# Supplementary material
Source: ML conference proceedings conference paper supplement (https://openreview.net/forum?id=A7O7Fl5Qo9W)
Supplement: supplementary_material [file attachment]

## Appendix

### A Decomposition of the State Space

#### A.1 The $E_u \oplus E_s$ -decomposition

It is evident that the following two subspaces of  $\mathbb{R}^n$  are invariant with respect to  $A$ , namely

$$E_u := \bigoplus_{i \leq k} E_i, \quad E_s := \bigoplus_{i > k} E_i$$

which we refer to as the *unstable subspace* and the *stable subspace* of  $A$ , respectively. Since the eigenspaces  $E_i$  sum to the whole  $\mathbb{R}^n$  space, one natural decomposition is  $\mathbb{R}^n = E_u \oplus E_s$ ; accordingly, each state can be uniquely decomposed as  $x = x_u + x_s$ , where  $x_u \in E_u$  is called the *unstable component*, and  $x_s \in E_s$  is called the *stable component*.

We also decompose  $A$  based on the  $E_u \oplus E_s$ -decomposition. Suppose  $E_u$  and  $E_s$  are represented by their *orthonormal* bases  $Q_1 \in \mathbb{R}^{n \times k}$  and  $Q_2 \in \mathbb{R}^{n \times (n-k)}$ , respectively, namely

$$E_u = \text{col}(Q_1), \quad E_s = \text{col}(Q_2).$$

Let  $Q = [Q_1 \ Q_2]$  (which is invertible as long as  $A$  is diagonalizable), and let  $R = [R_1^\top \ R_2^\top]^\top := Q^{-1}$ . Further, let  $\Pi_u := Q_1 R_1$  and  $\Pi_s := Q_2 R_2$  be the *oblique* projectors onto  $E_u$  and  $E_s$  (along the other subspace), respectively. Since  $E_u$  and  $E_s$  are both invariant with regard to  $A$ , we know there exists  $N_1 \in \mathbb{R}^{k \times k}$ ,  $N_2 \in \mathbb{R}^{(n-k) \times (n-k)}$ , such that

$$AQ = Q \begin{bmatrix} N_1 & \\ & N_2 \end{bmatrix} \Leftrightarrow N := \begin{bmatrix} N_1 & \\ & N_2 \end{bmatrix} = RAQ.$$

Let  $z = [z_1^\top \ z_2^\top]^\top$  be the coordinate representation of  $x$  in the basis  $Q$  (i.e.,  $x = Qz$ ). The system dynamics in  $z$ -coordinates can be expressed as

$$\begin{bmatrix} z_{1,t+1} \\ z_{2,t+1} \end{bmatrix} = RAQ \begin{bmatrix} z_{1,t} \\ z_{2,t} \end{bmatrix} + RBu_t = \begin{bmatrix} N_1 & \\ & N_2 \end{bmatrix} \begin{bmatrix} z_{1,t} \\ z_{2,t} \end{bmatrix} + \begin{bmatrix} R_1 B \\ R_2 B \end{bmatrix} u_t.$$

The major advantage of this decomposition is that the dynamical matrix in  $z$ -coordinate is block diagonal, so it would be simpler to study the behavior of the open-loop system.

#### A.2 Geometric Interpretation: Principle Angles

Before going any further, we emphasize that Definition 3.1 is well-defined by itself, since singular values are preserved under orthonormal transformations.

It might seem unintuitive to interpret  $\sigma_{\min}(P_2^\top Q_2)$  in Definition 3.1 as a measure of “closeness”. However, this is closely related to the *principle angles* between subspaces that generalize the standard angle measures in lower dimensional cases. More specifically, we can recursively define the  $i^{\text{th}}$  principle angle  $\theta_i$  ( $i = 1, \dots, n-k$ ) as

$$\theta_i := \min \left\{ \arccos \left( \frac{\langle x, y \rangle}{\|x\| \|y\|} \right) \mid \begin{array}{l} x \in E_u^\perp, x \perp \text{span}(x_1, \dots, x_{i-1}); \\ y \in E_s, y \perp \text{span}(y_1, \dots, y_{i-1}). \end{array} \right\} =: \angle(x_i, y_i), \quad (7)$$

where  $x_i$  and  $y_i$  ( $i = 1, \dots, n-k$ ) are referred to as the  $i^{\text{th}}$  principle vectors accordingly. Meanwhile, let  $P_2^\top Q_2 = U \Sigma V^\top$  be the singular value decomposition (SVD), where  $\Sigma = \text{diag}(\sigma_1, \dots, \sigma_{n-k})$  and  $\sigma_1 \geq \dots \geq \sigma_{n-k}$ . Then by an equivalent recursive characterization of singular values, we have

$$\sigma_i = \max_{\substack{\|x\|=\|y\|=1 \\ \forall j < i: x \perp x_j, y \perp y_j}} x^\top P_2^\top Q_2 y =: \bar{x}_i^\top P_2^\top Q_2 \bar{y}_i.$$

Since  $P_2$  and  $Q_2$  are orthonormal,  $\bar{x}_i$  and  $\bar{y}_i$  can be regarded as coordinate representations of  $x_i = P_2 \bar{x}_i$  and  $y_i = Q_2 \bar{y}_i$ , and it can be easily verified that  $x_i$  and  $y_i$  defined in this way are exactly the minimizers in (7). Hence we conclude that  $\sigma_i = \cos \theta_i$ . Therefore,  $E_u^\perp$  and  $E_s$  are  $\xi$ -close if and only if the all principle angles between  $E_u^\perp$  and  $E_s$  lie in the interval  $[0, \arccos(1 - \xi)]$ ; the above argument also shows that we can find orthonormal bases for  $E_u^\perp$  and  $E_s$  so that corresponding vectors form exactly the principle angles.

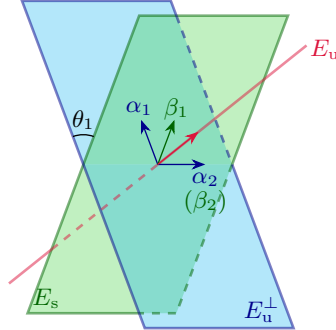

### 609 A.3 Characterization of $\xi$ -close Subspaces

610 It is naturally expected that the geometric interpretation should inspire more relationships among  
 611  $P_1 = Q_1, P_2, Q_2, R_1, R_2$  and  $N_2$ . We would like to emphasize that  $P_1, P_2$  and  $Q_1$  are not confined  
 612 to bases consisting of eigenvectors (since they are even not necessarily orthonormal). Meanwhile,  
 613 since they are only used in the stability guarantee proof, we are granted the freedom to select any  
 614 orthonormal bases. For simplicity, we will stick to the convention that  $P_1 = Q_1$  (and thus  $M_1 =$   
 615  $N_1$ ). Further, in Lemma A.1, such freedom is utilized to establish fundamental relationships between  
 616 the bases in the above two decompositions. The results are concluded as follows.

617 **Lemma A.1.** Suppose  $E_u^\perp$  and  $E_s$  are  $\xi$ -close. Then we shall select  $P_2$  and  $Q_2$  such that

618 (1)  $\sigma_{\min}(P_2^\top Q_2) \geq 1 - \xi, \|P_1^\top Q_2\| \leq \sqrt{2\xi}, \|P_2 - Q_2\| \leq \sqrt{2\xi}.$

619 (2)  $\|R_2\| \leq \frac{1}{1-\xi}, \|N_2\| \leq \frac{1}{1-\xi}\|A\|.$

620 (3)  $\|P_1^\top - R_1\| \leq \frac{\sqrt{2\xi}}{1-\xi}, \|R_1\| \leq \frac{\sqrt{2\xi}}{1-\xi} + 1.$

621 (4)  $\|\Delta\| \leq \frac{2-\xi}{1-\xi}\sqrt{2\xi}\|A\|.$

622 *Proof.* (1) Following the above interpretation, take arbitrary orthonormal bases  $\bar{P}_2$  and  $\bar{Q}_2$  of  $E_u^\perp$   
 623 and  $E_s$ , respectively, and let  $\bar{P}_2^\top \bar{Q}_2 = U \Sigma V^\top$  be the SVD, which translates to

$$(\bar{P}_2 U)^\top (\bar{Q}_2 V) = \Sigma =: \text{diag}(\sigma_1, \dots, \sigma_{n-k}).$$

624 Since  $U$  and  $V$  are orthonormal matrices, the columns of  $\bar{P}_2 U$  and  $\bar{Q}_2 V$  also form orthonormal bases  
 625 of  $E_u^\perp$  and  $E_s$ , respectively. Then  $\xi$ -closeness basically says that there exist a basis  $\{\alpha_1, \dots, \alpha_{n-k}\}$   
 626 for  $E_u^\perp$ , and a basis  $\{\beta_1, \dots, \beta_{n-k}\}$  for  $E_s$  (both are assumed to be orthonormal), such that

$$\langle \alpha_i, \beta_j \rangle = \delta_{ij} \sigma_i = \begin{cases} \sigma_i \geq 1 - \xi & \text{for any } i = j \\ 0 & \text{for any } i \neq j \end{cases},$$

627 and we also have  $\Pi_2 \beta_i = \sigma_i \alpha_i$  and  $\Pi_1 \alpha_i = \sigma_i \beta_i$  (recall that  $\Pi_1, \Pi_2$  are orthogonal projectors  
 628 onto subspaces  $E_u, E_s^\perp$ , respectively). Therefore, without loss of generality, we shall always select  
 629  $P_2 = [\alpha_1 \dots \alpha_{n-k}]$  and  $Q_2 = [\beta_1 \dots \beta_{n-k}]$ , such that  $P_2^\top Q_2 = \text{diag}(\sigma_1, \dots, \sigma_{n-k})$ , and

$$\sigma_{\min}(P_2^\top Q_2) = \min_i \sigma_i \geq 1 - \xi.$$

630 Equivalently speaking, for any  $\beta = Q_2 \eta \in E_s$ , we have (note that  $\|\eta\| = \|\beta\|$ )

$$\|P_2^\top \beta\| = \|P_2^\top Q_2 \eta\| \geq \sigma_{\min}(P_2^\top Q_2) \|\eta\| \geq (1 - \xi) \|\beta\|,$$

631 and consequently,

$$\|P_1^\top Q_2 \eta\| = \|P_1^\top \beta\| = \sqrt{\|\beta\|^2 - \|P_2^\top \beta\|^2} \leq \sqrt{2\xi} \|\beta\| = \sqrt{2\xi} \|\eta\|,$$

632 which further shows  $\|P_1^\top Q_2\| \leq \sqrt{2\xi}$ . To bound  $\|P_2 - Q_2\|$ , by definition we have

$$\begin{aligned} \|P_2 - Q_2\| &= \max_{\|\eta\|=1} \|(P_2 - Q_2)\eta\| = \max_{\|\eta\|=1} \left\| \sum_i \eta_i (\alpha_i - \beta_i) \right\| \\ &= \max_{\|\eta\|=1} \sqrt{\sum_{i,j} \eta_i \eta_j (\alpha_i - \beta_i)^\top (\alpha_j - \beta_j)} \\ &= \max_{\|\eta\|=1} \sqrt{\sum_i 2(1 - \mu_i) \eta_i^2} \\ &\leq \max_{\|\eta\|=1} \sqrt{2\xi \sum_i \eta_i^2} = \sqrt{2\xi}. \end{aligned}$$

633 Here  $\eta = [\eta_1, \dots, \eta_{n-k}]$  is an arbitrary vector in  $\mathbb{R}^{n-k}$ .

634 (2) By definition,  $I = QR = Q_1 R_1 + Q_2 R_2$ . Also recall that  $P_1 = Q_1$ , so we have  $P_1^\top Q_1 = I$  and  
 635  $P_2^\top Q_1 = \mathbf{0}$ . Then by left-multiplying  $P_2^\top$  to the equality, we have

$$P_2^\top = P_2^\top Q_1 R_1 + P_2^\top Q_2 R_2 = P_2^\top Q_2 R_2,$$

636 which further shows

$$\|R_2\| = \|(P_2^\top Q_2)^{-1} P_2^\top\| \leq \|(P_2^\top Q_2)^{-1}\| = \frac{1}{\sigma_{\min}(P_2^\top Q_2)} \leq \frac{1}{1-\xi}.$$

637 Therefore, since  $N_2 = R_2 A Q_2$ , we have

$$\|N_2\| = \|R_2 A Q_2\| \leq \|R_2\| \|A\| \|Q_2\| \leq \frac{1}{1-\xi} \|A\|.$$

638 (3) Similarly, by left-multiplying  $P_1^\top$  to the equality, we have

$$P_1^\top = P_1^\top Q_1 R_1 + P_1^\top Q_2 R_2 = R_1 + P_1^\top Q_2 R_2,$$

639 which further shows

$$\|P_1^\top - R_1\| = \|P_1^\top Q_2 R_2\| \leq \|P_1^\top Q_2\| \|R_2\| \leq \frac{\sqrt{2\xi}}{1-\xi},$$

640 and therefore  $\|R_1\| \leq \|P_1^\top - R_1\| + \|P_1^\top\| = 1 + \frac{\sqrt{2\xi}}{1-\xi}$ .

641 (4) A combination of the above results gives

$$\begin{aligned} \|\Delta\| &= \|P_1^\top A P_2\| = \|P_1^\top A P_2 - R_1 A Q_2\| \\ &\leq \|P_1^\top A (P_2 - Q_2)\| + \|(P_1^\top - R_1) A Q_2\| \\ &\leq \|P_1^\top\| \|A\| \|P_2 - Q_2\| + \|P_1^\top - R_1\| \|A\| \|Q_2\| \\ &\leq \|A\| \sqrt{2\xi} + \frac{\sqrt{2\xi}}{1-\xi} \|A\| = \frac{2-\xi}{1-\xi} \sqrt{2\xi} \|A\|. \end{aligned}$$

642 This completes the proof. □

## 643 B Solution to the Least Squares Problem in Stage 2

644 Lemma B.1 gives the explicit form for the solution to the least squares problem (see Algorithm 1).

645 **Lemma B.1.** Given  $D := [x_{t_0+1} \cdots x_{t_0+k}]$  and  $\hat{P}_1 \hat{P}_1^\top = \hat{\Pi}_1 = D(D^\top D)^{-1} D^\top$ , the solution

$$\hat{M}_1 = \arg \min_{M_1} \sum_{t=t_0+1}^{t_0+k} \|\hat{P}_1^\top x_{t+1} - M_1 \hat{P}_1^\top x_t\|^2$$

646 is uniquely given by  $\hat{M}_1 = \hat{P}_1^\top A \hat{P}_1$ .

647 *Proof.* Here we assume by default that the summation over  $t$  sums from  $t_0 + 1$  to  $t_0 + k$ . Since  $M_1$   
648 is a stationary point of  $\mathcal{L}$ , for any  $\Delta$  in the neighbourhood of  $O$ , we have

$$\begin{aligned} 0 \leq \mathcal{L}(M_1 + \Delta) - \mathcal{L}(M_1) &= \sum_t \|\hat{y}_{1,t+1} - M_1 \hat{y}_{1,t} - \Delta \hat{y}_{1,t}\|^2 - \sum_t \|\hat{y}_{1,t+1} - M_1 \hat{y}_{1,t}\|^2 \\ &= \sum_t \langle \Delta \hat{y}_{1,t}, \hat{y}_{1,t+1} - M_1 \hat{y}_{1,t} \rangle + O(\|\Delta\|^2) \\ &= \sum_t \text{tr}(\hat{y}_{1,t}^\top \Delta^\top (\hat{y}_{1,t+1} - M_1 \hat{y}_{1,t})) + O(\|\Delta\|^2) \\ &= \sum_t \text{tr}(\Delta^\top (\hat{y}_{1,t+1} - M_1 \hat{y}_{1,t}) \hat{y}_{1,t}^\top) + O(\|\Delta\|^2) \\ &= \text{tr}\left(\Delta^\top \sum_t (\hat{y}_{1,t+1} - M_1 \hat{y}_{1,t}) \hat{y}_{1,t}^\top\right) + O(\|\Delta\|^2). \end{aligned}$$

649 Since it always holds for any  $\Delta$ , we must have

$$\sum_t (\hat{y}_{1,t+1} - M_1 \hat{y}_{1,t}) \hat{y}_{1,t}^\top \Leftrightarrow M_1 \sum_t \hat{y}_{1,t} \hat{y}_{1,t}^\top = \sum_t \hat{y}_{1,t+1} \hat{y}_{1,t}^\top.$$

650 Plugging in  $\hat{y}_{1,t} = \hat{P}_1^\top x_t$  and  $\hat{y}_{1,t+1} = \hat{P}_1^\top A x_t$ , we further have

$$M_1 \hat{P}_1^\top X \hat{P}_1 = M_1 \sum_t \hat{P}_1^\top x_t x_t^\top \hat{P}_1 = \sum_t \hat{P}_1^\top A x_t x_t^\top \hat{P}_1 = \hat{P}_1^\top A X \hat{P}_1,$$

651 where  $X := \sum_t x_t x_t^\top = D D^\top$ . Since the columns of  $\hat{P}_1$  form an orthonormal basis of  $\hat{E}_u$ , for any  
 652  $x \in \hat{E}_u$ ,  $\hat{P}_1^\top x$  is the coordinate of  $x$  under that basis. The columns of  $D$  are linearly independent,  
 653 so the columns of  $\hat{P}_1^\top D$  are also linearly independent, which further yields

$$\text{rank}(\hat{P}_1^\top X \hat{P}_1) = \text{rank}((\hat{P}_1^\top D)(\hat{P}_1^\top D)^\top) = \text{rank}(\hat{P}_1^\top D) = k.$$

654 Therefore,  $\hat{P}_1^\top X \hat{P}_1$  is invertible, and  $M_1$  is explicitly given by

$$M_1 = (\hat{P}_1^\top A X \hat{P}_1)(\hat{P}_1^\top X \hat{P}_1)^{-1}.$$

655 Note that  $\hat{H}_1 = \hat{P}_1 \hat{P}_1^\top$  is the projector onto subspace  $\text{col}(D)$ , we must have

$$\hat{P}_1 \hat{P}_1^\top X = (\hat{H}_1 D) D^\top = D D^\top = X,$$

656 which yields

$$M_1 = (\hat{P}_1^\top A (\hat{P}_1 \hat{P}_1^\top X) \hat{P}_1)(\hat{P}_1^\top X \hat{P}_1)^{-1} = (\hat{P}_1^\top A \hat{P}_1)(\hat{P}_1^\top X \hat{P}_1)(\hat{P}_1^\top X \hat{P}_1)^{-1} = \hat{P}_1^\top A \hat{P}_1.$$

657 This completes the proof of Lemma B.1.  $\square$

658 It might help understanding to note that, when  $\hat{P}_1 = P_1$ , for any  $x_t, x_{t+1} \in E_u$  we have

$$P_1^\top A x_t = y_{t+1} = M_1 y_t = M_1 P_1^\top x_t,$$

659 which requires  $P_1^\top A = M_1 P_1^\top$ , or equivalently  $M_1 = P_1^\top A P_1$  (recall  $P_1^\top P_1 = I$ ).

## 660 C Transformation of $B$ with Arbitrary Columns

661 In the remaining sections of this paper, we have always regarded  $B$  as an  $n$ -by- $k$  matrix (i.e.,  $m =$   
 662  $k$ ). In this section, we will show that other cases can be handled in a similar way under proper  
 663 transformations. This is trivial for the case where  $m > k$ , since we can simply select  $k$  linearly  
 664 independent columns from  $B$ , and pad 0's in  $u_t$  for all unselected entries.

665 For the case where  $m < k$ , let  $d = \lceil k/m \rceil$ . Intuitively, we can “pack” every  $d$  consecutive steps to  
 666 obtain a system with sufficient number of control inputs. More specifically, let

$$\tilde{x}_t = \begin{bmatrix} x_{td} \\ x_{td+1} \\ \vdots \\ x_{(t+1)d-1} \end{bmatrix}, \quad \tilde{u}_t = \begin{bmatrix} u_{td-1} \\ u_{td} \\ \vdots \\ u_{(t+1)d-2} \end{bmatrix},$$

$$\tilde{A} = \begin{bmatrix} \mathbf{0} & & A \\ & \ddots & \vdots \\ & & \mathbf{0} & A^{d-1} \\ & & & A^d \end{bmatrix}, \quad \tilde{B} = \begin{bmatrix} B & & & \\ AB & B & & \\ \vdots & \vdots & \ddots & \\ A^{d-1}B & A^{d-2}B & \dots & B \end{bmatrix},$$

667 and consider the transformed system with dynamics

$$\tilde{x}_{t+1} = \tilde{A} \tilde{x}_t + \tilde{B} \tilde{u}_t.$$

668 The instability index of  $\tilde{A}$  is still  $k$ , with  $|\tilde{\lambda}_i| = |\lambda_i|^d$  ( $i = 1, \dots, n$ ). Norms of  $\tilde{A}$  and  $\tilde{B}$  satisfy

$$\|\tilde{A}\| \leq \sqrt{\sum_{i=1}^d \|A^i\|^2} = \|A^d\| O(d), \quad \|\tilde{B}\| \leq \|B\| \sqrt{\sum_{i=1}^d (d-i) \|A^i\|^2} = \|A^d\| \|B\| O(d).$$

669 Since  $d \leq k \ll n$ , the above transformation only multiplies the bounds by a small constant.

## 670 D Proof of Lemma 5.3

671 Lemma 5.3 is actually a direct corollary of the following lemma, for which we first need to define  
 672  $\text{gap}_i(A)$ , the (bipartite)spectral gap around  $\lambda_i$  with respect to  $A$ , namely

$$\text{gap}_i(A) := \begin{cases} \min_{\lambda_j \in \lambda(A_2)} |\lambda_i - \lambda_j| & \lambda_i \in \lambda(A_1) \\ \min_{\lambda_j \in \lambda(A_1)} |\lambda_i - \lambda_j| & \lambda_i \in \lambda(A_2) \end{cases},$$

673 where  $\lambda(A)$  denotes the spectrum of  $A$ .

674 **Lemma D.1.** For 2-by-2 block matrices  $A$  and  $E$  in the form

$$A = \begin{bmatrix} A_1 & \mathbf{0} \\ \mathbf{0} & A_2 \end{bmatrix}, \quad E = \begin{bmatrix} \mathbf{0} & E_{12} \\ E_{21} & \mathbf{0} \end{bmatrix},$$

675 we have

$$|\lambda_i(A + E) - \lambda_i(A)| \leq \frac{\kappa_d(A)\kappa_d(A + E)}{\text{gap}_i(A)} \|E_{12}\| \|E_{21}\|.$$

676 Here  $\kappa_d(A)$  is the condition number of the matrix consisting of  $A$ 's eigenvectors as columns.

677 *Proof.* The proof of the lemma can be found in existing literature like [53]. □

678 *Proof of Lemma 5.3.* Lemma D.1 basically guarantees that every eigenvalue of  $A + E$  is within  
 679 a distance of  $O(\|E_{12}\| \|E_{21}\|)$  from some eigenvalue of  $A$ . Hence, by defining  $\chi(A + E)$  as the  
 680 maximum coefficient, namely

$$\chi(A + E) := \frac{\kappa_d(A)\kappa_d(A + E)}{\min_i \{\text{gap}_i(A)\}},$$

681 we shall guarantee  $|\rho(A + E) - \rho(A)| \leq \chi(A + E) \|E_{12}\| \|E_{21}\|$ . □

## 682 E Proof of Theorem 5.1 and its Corollary

683 The main idea of this proof is to diagonalize  $A$  and write the open-loop system dynamics using the  
 684 basis formed by the eigenvectors of  $A$ . Then, we provide an explicit expression for  $\hat{\Pi}_1$  and  $\Pi_1$ ,  
 685 based on which we can bound the error. To further derive a bound for  $\|\hat{P}_1 - P_1\|$ , one only needs  
 686 to notice that norms are preserved under orthonormal coordinate transformations, so it only suffices  
 687 to find a specific pair of bases of  $E_u^\perp$  and  $E_s$  that are close to each other — and the pair of bases  
 688 formed by principle vectors (see Appendix A) is exactly what we want. This leads to Corollary 5.2  
 689 that is repeatedly used in subsequent proofs.

690 Without loss of generality, we shall write all matrices in the basis formed by unit eigenvectors  
 691  $\{w_1, \dots, w_n\}$  of  $A$ . Otherwise, let  $W = [w_1 \dots w_n]$ , and perform change-of-coordinate by setting  
 692  $\tilde{D} := W^{-1}DW$ ,  $\tilde{\Pi}_1 := W^{-1}\Pi_1W$ , which further gives

$$\tilde{\Pi}_1 = \tilde{D}(\tilde{D}^\top \tilde{D})^{-1} \tilde{D}^\top = (W^{-1}DW)(W^{-1}D^\top DW)^{-1}(W^{-1}D^\top W) = W^{-1}\hat{\Pi}_1W.$$

693 Note that  $\|W^{-1}\hat{\Pi}_1W - W^{-1}\Pi_1W\| \leq \|W\| \|W^{-1}\| \|\hat{\Pi}_1 - \Pi_1\|$ , where the upper bound is only  
 694 magnified by a constant factor of  $\kappa_d(A) = \|W\| \|W^{-1}\|$  that is completely determined by  $A$ . There-  
 695 fore, it is largely equivalent to consider  $(\tilde{D}, \tilde{\Pi}_1, \tilde{\hat{\Pi}}_1)$  instead of  $(D, \Pi_1, \hat{\Pi}_1)$ .

696 Note that the matrix  $D = [x_{t_0+1} \dots x_{t_0+k}]$  can be written as

$$D = \begin{bmatrix} d_1 & \lambda_1 d_1 & \dots & \lambda_1^{k-1} d_1 \\ d_2 & \lambda_2 d_2 & \dots & \lambda_2^{k-1} d_2 \\ \vdots & \vdots & \ddots & \vdots \\ d_n & \lambda_n d_n & \dots & \lambda_n^{k-1} d_n \end{bmatrix},$$

697 where  $x_{t_0+1} = [d_1, \dots, d_n]^\top$ . We first present a lemma characterizing some well-known properties  
 698 of Vandermonde matrices that we need in the proof.

699 **Lemma E.1.** Given a Vandermonde matrix in variables  $x_1, \dots, x_n$  of order  $n$

$$V := V_n(x_1, \dots, x_n) = \begin{bmatrix} 1 & 1 & \dots & 1 \\ x_1 & x_2 & \dots & x_n \\ \vdots & \vdots & \ddots & \vdots \\ x_1^{n-1} & x_2^{n-1} & \dots & x_n^{n-1} \end{bmatrix},$$

700 its determinant is given by

$$\det(V) = \sum_{\pi} (-1)^{\text{sgn}(\pi)} x_{\pi(i_1)}^0 x_{\pi(i_2)}^1 \dots x_{\pi(i_n)}^{n-1} = \prod_{j < \ell} (x_\ell - x_j), \quad (8)$$

701 and its  $(u, v)$ -cofactor is given by

$$\text{cof}_{u,v}(V) = \begin{vmatrix} 1 & \dots & 1 & 1 & \dots & 1 \\ \vdots & \ddots & \vdots & \vdots & \ddots & \vdots \\ x_1^{u-2} & \dots & x_{v-1}^{u-2} & x_{v+1}^{u-2} & \dots & x_n^{u-2} \\ x_1^u & \dots & x_{v-1}^u & x_{v+1}^u & \dots & x_n^u \\ \vdots & \ddots & \vdots & \vdots & \ddots & \vdots \\ x_1^{n-1} & \dots & x_{v-1}^{n-1} & x_{v+1}^{n-1} & \dots & x_n^{n-1} \end{vmatrix} = \sigma_{u,v} \prod_{j < \ell \neq v} (x_\ell - x_j). \quad (9)$$

702 Here coefficients  $\sigma_{u,v}$  are given by  $\sigma_{u,v} := s_{n-u}(x_1, \dots, x_{v-1}, x_{v+1}, \dots, x_n)$ , where function  $s_m$   
703 is defined by  $s_m(y_1, \dots, y_n) := \sum_{i_1 < \dots < i_m} y_{i_1} \dots y_{i_m}$ .

704 *Proof of Lemma E.1.* The proof of (8) can be found in any standard linear algebra textbook, and that  
705 of (9) can be found in [54].  $\square$

706 It is evident that the entries in  $D$  display a similar pattern as those of a Vandermonde matrix. Based  
707 on this observation, we shall further derive the explicit form of  $\hat{H}_1$  as in the next lemma.

708 **Lemma E.2.** The projector  $\hat{H}_1 = D(D^\top D)^{-1} D^\top$  has explicit form

$$(\hat{H}_1)_{uv} = \frac{\sum_{\substack{i_2 < \dots < i_k \\ \forall j: i_j \neq u, v}} \alpha_{u, i_2, \dots, i_k} \alpha_{v, i_2, \dots, i_k}}{\sum_{i_1 < \dots < i_k} \alpha_{i_1, \dots, i_k}^2},$$

709 where the summand  $\alpha_{i_1, \dots, i_k}$  (with ordered subscript) is defined as

$$\alpha_{i_1, \dots, i_k} := \prod_j d_{i_j} \prod_{j < \ell} (\lambda_{i_\ell} - \lambda_{i_j}).$$

710 *Proof of Lemma E.2.* We start by deriving the explicit form of  $(D^\top D)^{-1}$ . Note that the determinant  
711 (which is also the denominator in the lemma) is given by

$$\begin{aligned} \det(D^\top D) &= \sum_{i_1, \dots, i_k} \begin{vmatrix} \lambda_{i_1}^0 d_{i_1}^2 & \lambda_{i_2}^1 d_{i_2}^2 & \dots & \lambda_{i_k}^{k-1} d_{i_k}^2 \\ \lambda_{i_1}^1 d_{i_1}^2 & \lambda_{i_2}^2 d_{i_2}^2 & \dots & \lambda_{i_k}^k d_{i_k}^2 \\ \vdots & \vdots & \ddots & \vdots \\ \lambda_{i_1}^{k-1} d_{i_1}^2 & \lambda_{i_2}^k d_{i_2}^2 & \dots & \lambda_{i_k}^{2k-2} d_{i_k}^2 \end{vmatrix} \\ &= \sum_{i_1, \dots, i_k} d_{i_1}^2 \dots d_{i_k}^2 \lambda_{i_1}^0 \lambda_{i_2}^1 \dots \lambda_{i_k}^{k-1} \prod_{j < \ell} (\lambda_{i_\ell} - \lambda_{i_j}) \\ &= \sum_{i_1 < \dots < i_k} d_{i_1}^2 \dots d_{i_k}^2 \prod_{j < \ell} (\lambda_{i_\ell} - \lambda_{i_j}) \sum_{\pi} (-1)^{\text{sgn}(\pi)} \lambda_{\pi(j_1)}^0 \lambda_{\pi(j_2)}^1 \dots \lambda_{\pi(j_k)}^{k-1} \\ &= \sum_{i_1 < \dots < i_k} d_{i_1}^2 \dots d_{i_k}^2 \prod_{j < \ell} (\lambda_{i_\ell} - \lambda_{i_j})^2 \\ &= \sum_{i_1 < \dots < i_k} \alpha_{i_1, \dots, i_k}^2, \end{aligned}$$

712 and the  $(u, v)$ -cofactor  $\text{cof}_{u,v}(D^\top D)$  is given by

$$\begin{aligned}
\text{cof}_{u,v}(D^\top D) &= (-1)^{u+v} \sum_{i_1, \dots, i_{k-1}} \begin{vmatrix} \lambda_{i_1}^0 d_{i_1}^2 & \cdots & \lambda_{i_{v-1}}^{v-2} d_{i_{v-1}}^2 & \lambda_{i_v}^v d_{i_v}^2 & \cdots & \lambda_{i_{k-1}}^{k-1} d_{i_{k-1}}^2 \\ \vdots & \ddots & \vdots & \vdots & \ddots & \vdots \\ \lambda_{i_1}^{u-2} d_{i_1}^2 & \cdots & \lambda_{i_{v-1}}^{u+v-4} d_{i_{v-1}}^2 & \lambda_{i_v}^{u+v-2} d_{i_v}^2 & \cdots & \lambda_{i_{k-1}}^{u+k-3} d_{i_{k-1}}^2 \\ \lambda_{i_1}^u d_{i_1}^2 & \cdots & \lambda_{i_{v-1}}^{u+v-2} d_{i_{v-1}}^2 & \lambda_{i_v}^{u+v} d_{i_v}^2 & \cdots & \lambda_{i_{k-1}}^{u+k-1} d_{i_{k-1}}^2 \\ \vdots & \ddots & \vdots & \vdots & \ddots & \vdots \\ \lambda_{i_1}^{k-1} d_{i_1}^2 & \cdots & \lambda_{i_{u+v-2}}^{k+v-3} d_{i_{v-1}}^2 & \lambda_{i_v}^{k+v-1} d_{i_v}^2 & \cdots & \lambda_{i_{k-1}}^{2k-2} d_{i_{k-1}}^2 \end{vmatrix} \\
&= (-1)^{u+v} \sum_{i_1, \dots, i_{k-1}} d_{i_1}^2 \cdots d_{i_{k-1}}^2 \lambda_{i_1}^0 \cdots \lambda_{i_{v-1}}^{v-2} \lambda_{i_v}^v \cdots \lambda_{i_{k-1}}^{k-1} s_{k-u} \prod_{j < \ell} (\lambda_{i_\ell} - \lambda_{i_j}) \\
&= (-1)^{u+v} \sum_{i_1 < \dots < i_{k-1}} s_{k-u} \cdot d_{i_1}^2 \cdots d_{i_{k-1}}^2 \prod_{j < \ell} (\lambda_{i_\ell} - \lambda_{i_j}) \cdot \\
&\quad \sum_{\pi} (-1)^{\text{sgn}(\pi)} \lambda_{\pi(i_1)}^0 \cdots \lambda_{\pi(i_{v-1})}^{v-2} \lambda_{\pi(i_v)}^v \cdots \lambda_{\pi(i_{k-1})}^{k-1} \\
&= (-1)^{u+v} \sum_{i_1 < \dots < i_{k-1}} s_{k-u} s_{k-v} \cdot d_{i_1}^2 \cdots d_{i_{k-1}}^2 \prod_{j < \ell} (\lambda_{i_\ell} - \lambda_{i_j})^2,
\end{aligned}$$

713 where  $s_{k-u}(\lambda_{i_1}, \dots, \lambda_{i_{k-1}})$  is abbreviated to  $s_{k-u}$ .

714 Note that symmetry of  $D^\top D$  guarantees  $\text{cof}_{v,u}(D^\top D) = \text{cof}_{u,v}(D^\top D)$ , so we have

$$(D^\top D)_{u,v}^{-1} = \frac{\text{cof}_{v,u}(D^\top D)}{\det(D^\top D)} = \frac{\text{cof}_{u,v}(D^\top D)}{\det(D^\top D)}.$$

715 And eventually we shall derive that

$$\begin{aligned}
\hat{P}_{u,v} &= \sum_{p,q} D_{u,p} (D^\top D)_{p,q}^{-1} D_{q,v}^\top \\
&= \frac{1}{\det(D^\top D)} \sum_{p,q} D_{u,p} D_{v,q} \text{cof}_{u,v}(D^\top D) \\
&= \frac{1}{\det(D^\top D)} \sum_{p,q} \lambda_u^{p-1} d_u \lambda_v^{q-1} d_v \cdot (-1)^{p+q} \sum_{i_1 < \dots < i_{k-1}} s_{k-p} s_{k-q} \cdot d_{i_1}^2 \cdots d_{i_{k-1}}^2 \prod_{j < \ell} (\lambda_{i_\ell} - \lambda_{i_j})^2 \\
&= \frac{1}{\det(D^\top D)} \sum_{i_1 < \dots < i_{k-1}} d_u d_v d_{i_1}^2 \cdots d_{i_{k-1}}^2 \prod_{j < \ell} (\lambda_{i_\ell} - \lambda_{i_j})^2 \sum_{p=1}^k (-1)^p \lambda_u^{p-1} s_{k-p} \sum_{q=1}^k (-1)^q \lambda_v^{q-1} s_{k-q} \\
&= \frac{1}{\det(D^\top D)} \sum_{i_1 < \dots < i_{k-1}} d_u d_{i_1} \cdots d_{i_{k-1}} \prod_{j < \ell} (\lambda_{i_\ell} - \lambda_{i_j}) \prod_{\ell} (\lambda_{i_\ell} - \lambda_u) \cdot \\
&\quad d_v d_{i_1} \cdots d_{i_{k-1}} \prod_{j < \ell} (\lambda_{i_\ell} - \lambda_{i_j}) \prod_{\ell} (\lambda_{i_\ell} - \lambda_v) \\
&= \frac{1}{\det(D^\top D)} \sum_{\substack{i_2 < \dots < i_k \\ \forall j: i_j \neq u, v}} \alpha_{u, i_2, \dots, i_k} \alpha_{v, i_2, \dots, i_k},
\end{aligned}$$

716 which is in exact the same form as stated in the lemma.  $\square$

717 Now we shall go back to the proof of the main result of this section.

718 *Proof of Theorem 5.1.* Recall that  $d_i = \lambda_i^{t_0+1} x_{0,i}$ . For the clarity of notations, let

$$\theta_{i_1, i_2, \dots, i_k} := \frac{\alpha_{i_1, i_2, \dots, i_k}}{\alpha_{1, 2, \dots, k}},$$

719 and it is evident that  $|\theta_{i_1, i_2, \dots, i_k}| = 1$  only if  $(i_1, i_2, \dots, i_k)$  is a permutation of  $(1, 2, \dots, k)$ . For  
 720 any other  $(i_1, i_2, \dots, i_k)$ , by the definition in Lemma E.2 we have

$$|\theta_{i_1, i_2, \dots, i_k}| \leq c_{i_1, i_2, \dots, i_k} \cdot r^{\sum_j \mathbf{1}_{i_j > k} t_0} \leq c \cdot r^{t_0},$$

721 where  $r = \frac{|\lambda_{k+1}|}{|\lambda_k|}$  and  $c := \max_{i_1, \dots, i_k} \{c_{i_1, i_2, \dots, i_k}\}$ . Therefore, since there are  $\binom{n}{k}$  different  $k$ -tuples  
 722  $(i_1, \dots, i_k)$  such that  $i_1 < \dots < i_k$ , we have

$$\sum_{i_1 < \dots < i_k} \theta_{i_1, \dots, i_k}^2 - \theta_{1, \dots, k}^2 < c \binom{n}{k} r^{2t_0}.$$

723 Now we can bound the entries in  $\hat{\Pi}_1$ . For any  $\varepsilon > 0$ , we shall select  $t_0$  such that  $c \binom{n}{k} r^{2t_0} < \frac{\varepsilon}{n^2}$ ,  
 724 where the denominator is always bounded by

$$1 \leq \sum_{i_1 < \dots < i_k} \theta_{i_1, \dots, i_k}^2 \leq 1 + \frac{\varepsilon}{n^2}.$$

725 For the nominator, note that for each  $\delta$  there are fewer entries with exponent  $\delta$  in the nominator than  
 726 in the denominator, so we can bound the denominator as

$$\left| \sum_{\substack{i_2 < \dots < i_k \\ \forall j: i_j \neq u, v}} \theta_{u, i_2, \dots, i_k} \theta_{v, i_2, \dots, i_k} \right| \leq \begin{cases} c \binom{n}{k} r^{2t_0} + 1 & u = v \leq k \\ c \binom{n}{k} r^{2t_0} & \text{otherwise} \end{cases}.$$

727 Therefore, when  $u = v \leq k$ , we have  $\sum_{\substack{i_2 < \dots < i_k \\ \forall j: i_j \neq u}} \theta_{u, i_2, \dots, i_k}^2 \geq 1$ , which shows

$$\left. \begin{aligned} (\hat{\Pi}_1)_{uv} &\geq \left(1 + \frac{\varepsilon}{n^2}\right)^{-1} \geq 1 - \frac{\varepsilon}{n^2} \\ (\hat{\Pi}_1)_{uv} &\leq 1 + \frac{\varepsilon}{n^2} \end{aligned} \right\} \Rightarrow |(\hat{\Pi}_1)_{uv} - (\Pi_1)_{uv}| \leq \frac{\varepsilon}{n^2};$$

728 for all other cases, the nominator cannot sum over a permutation of  $(1, \dots, k)$ , which gives

$$|(\hat{\Pi}_1)_{uv} - (\Pi_1)_{uv}| = |(\hat{\Pi}_1)_{uv}| \leq \frac{\varepsilon}{n^2}.$$

729 Therefore, the overall estimation error is bounded by

$$\|\hat{\Pi}_1 - \Pi_1\| \leq \sum_{u, v} |(\hat{\Pi}_1)_{uv} - (\Pi_1)_{uv}| \leq \varepsilon.$$

730 Recall that the bound is subject to a change-of-basis transformation, and in the general scenario  
 731 where the eigenvectors of  $A$  are not mutually orthogonal, the original prediction error bound should  
 732 be multiplied by  $\kappa_d(A)$ . Therefore, to achieve error threshold  $\varepsilon$  for predictions on  $\Pi_i$ , it is required  
 733 that  $c \binom{n}{k} r^{2t_0} < \frac{\varepsilon}{\kappa_d(A) n^2}$ , or equivalently, by *Stirling's Formula*,

$$t_0 > \frac{\log \kappa_d(A) + \log \frac{cn^2}{\varepsilon} + \log \binom{n}{k}}{2 \log \frac{1}{r}} = O \left( \frac{k \log n - \log \varepsilon + \log \kappa_d(A)}{2 \log \frac{|\lambda_k|}{|\lambda_{k+1}|}} \right). \quad (10)$$

734 This completes the proof.  $\square$

735 *Proof of Corollary 5.2.* We first construct a specific pair of orthonormal bases  $(P_1^*, \hat{P}_1^*)$  that satisfy  
 736 the corollary. To start with, take an arbitrary initial pair of orthonormal basis  $(P_1^\circ, \hat{P}_1^\circ)$ , and consider  
 737 the SVD  $(P_1^\circ)^\top \hat{P}_1^\circ = U \Sigma V^\top$ , which is equivalent to  $(P_1^\circ U)^\top (\hat{P}_1^\circ V) = \Sigma$ . Note that the columns  
 738 of  $P_1^\circ U = [w_1 \dots w_k]$  and  $\hat{P}_1^\circ V = [\hat{w}_1 \dots \hat{w}_k]$  form orthonormal bases of  $\text{col}(\Pi_1)$  and  $\text{col}(\hat{\Pi}_1)$ ,  
 739 respectively; furthermore, these bases project onto each other accordingly by subscripts, namely

$$\Pi_1 \hat{w}_i = \sigma_i w_i, \quad \hat{\Pi}_1 w_i = \sigma_i \hat{w}_i.$$

740 Now we set  $P_1^* := P_1^\circ U$  and  $\hat{P}_1^* := \hat{P}_1^\circ V$ . Note that

$$|1 - \sigma_i| = \|(\hat{\Pi}_1 - \Pi_1) \hat{w}_i\| < \varepsilon,$$



741 which shows, by properties of projection matrix  $\Pi_1$ ,

$$\|w_i - \hat{w}_i\| = \sqrt{\|w_i - \Pi_1 \hat{w}_i\|^2 + \|\Pi_1 \hat{w}_i - \hat{w}_i\|^2} = \sqrt{|1 - \sigma_i|^2 + \|(\hat{\Pi}_1 - \Pi_1)\hat{w}_i\|^2} < \sqrt{2}\varepsilon,$$

742 and thus

$$\|P_1^* - \hat{P}_1^*\| = \max_{\|z\|=1} \|(P_1^* - \hat{P}_1^*)z\| = \max_{\|z\|=1} \left\| \sum_i z_i (w_i - \hat{w}_i) \right\| \leq \sqrt{k} \cdot \sqrt{2}\varepsilon.$$

743 To further generalize the proposition to any arbitrary  $\hat{P}_1$ , we only have to note that there exists an  
 744 orthonormal matrix  $T$  that maps the basis  $\hat{P}_1^*$  to  $\hat{P}_1 = \hat{P}_1^* T$ . Now take  $P_1 = P_1^* T$ , and we have

$$\|\hat{P}_1 - P_1\| = \|(\hat{P}_1^* - P_1^*)T\| = \|\hat{P}_1^* - P_1^*\| < \sqrt{2k}\varepsilon.$$

745 As for the estimation error bound for  $M_1$ , we can directly write

$$\begin{aligned} \|P_1^\top A P_1 - \hat{P}_1^\top A \hat{P}_1\| &\leq \|P_1^\top A P_1 - P_1^\top A \hat{P}_1\| + \|P_1^\top A \hat{P}_1 - \hat{P}_1^\top A \hat{P}_1\| \\ &\leq \|A\| \|P_1 - \hat{P}_1\| + \|A\| \|P_1 - \hat{P}_1\| \\ &< 2\|A\|\delta, \end{aligned}$$

746 This completes the proof of the corollary.  $\square$

747 Recall that we are allowed to take any orthonormal basis  $P_1$  for  $E_u$ . Hence we shall always assume  
 748 by default that  $P_1$  in the proofs are selected as shown in the proof above.

749 We finish this section with simple but frequently-used bounds on  $\|\hat{P}_1^\top P_1\|$  and  $\|\hat{P}_1^\top P_2\|$ . These  
 750 factors represent an additional error introduced by using the inaccurate projector  $\hat{P}_1$ .

751 **Proposition E.1.** *Under the premises of Corollary 5.2,  $\|I_k - \hat{P}_1^\top P_1\| < \delta$ ,  $\|\hat{P}_1^\top P_2\| < \delta$ .*

752 *Proof.* Note that  $P_1^\top P_1 = I_k$  and  $P_1^\top P_2 = O$ , it is evident that

$$\begin{aligned} \|I_k - \hat{P}_1^\top P_1\| &= \|(P_1 - \hat{P}_1)^\top P_1\| < \delta, \\ \|\hat{P}_1^\top P_2\| &= \|(\hat{P}_1 - P_1)^\top P_2\| = \|\hat{P}_1 - P_1\| < \delta. \end{aligned}$$

753 This finishes the proof.  $\square$

## 754 F Proof of Theorem 4.2

755 We first consider a warm-up case where  $A$  is symmetric, which provides some intuition for the  
 756 general case. In this case, the eigenvectors of  $A$  are mutually orthogonal, which guarantees  $E_u^\perp = E_s$   
 757 (i.e., they are 0-close to each other) and thus  $\Delta = \mathbf{0}$ . This allows us to select  $\tau = 1$ ,  $\omega = 0$  and  
 758  $\alpha = 1$ , and the closed-loop dynamical matrix simplifies to

$$\hat{L}_1 = \begin{bmatrix} M_1 + P_1^\top B \hat{K}_1 \hat{P}_1^\top P_1 & P_1^\top B \hat{K}_1 \hat{P}_1^\top P_2 \\ P_2^\top B \hat{K}_1 \hat{P}_1^\top P_1 & M_2 + P_2^\top B \hat{K}_1 \hat{P}_1^\top P_2 \end{bmatrix}. \quad (11)$$

759 The norm of the top-left block is in the order of  $O(\delta)$  based on the estimation error bound (see  
 760 Theorem F.1)  $\|\hat{B}_1 - B_1\| = O(\sqrt{k}\delta)$ , which characterizes how well the controller can eliminate the  
 761 unstable component. The spectrum of the bottom-right block can be viewed as a perturbation (note  
 762 that  $\|\hat{P}_1^\top P_2\| = O(\delta)$  is small by Proposition E.1) to a stable matrix  $M_2$  (recall  $\rho(M_2) = |\lambda_{k+1}|$ ),  
 763 which should also be stable as long as  $\delta$  is small enough. Meanwhile, the top-right block is also  
 764 approximately zero, since only projection error contributes to the top-right block (again  $\|\hat{P}_1^\top P_2\| =$   
 765  $O(\delta)$ ). The above observations together show that  $\hat{L}_1$  is in the order of

$$\hat{L}_1 = \begin{bmatrix} O(\delta) & O(\delta) \\ O(1) & |\lambda_{k+1}| + O(\delta) \end{bmatrix}, \quad (12)$$

766 which is almost lower-triangular. Therefore, we can apply the block perturbation bound to bound  
 767 the spectrum of  $\hat{L}_1$ .

768 We start by showing the estimation error bound for  $B_1$ , which is straight-forward since  $\Delta = \mathbf{0}$ . Note  
 769 that the upper bound of the norm of our controller  $\hat{K}_1$  appears as a natural corollary of it.

770 **Proposition F.1.** *Under the premises of Theorem 4.2,  $\|\hat{B}_1 - B_1\| < 4\|A\|\sqrt{k}\delta$ .*

771 *Proof.* Note that the column vector  $b_i$  has estimation error bound

$$\begin{aligned}\|b_i - \hat{b}_i\| &= \frac{1}{\|x_{t_i}\|} \left\| (P_1^\top x_{t_{i+1}} - M_1 P_1^\top x_{t_i}) - (\hat{P}_1^\top x_{t_{i+1}} - \hat{M}_1 \hat{P}_1^\top x_{t_i}) \right\| \\ &\leq \frac{1}{\|x_{t_i}\|} \left( \|(P_1^\top - \hat{P}_1^\top) A x_{t_i}\| + \|(M_1 P_1^\top - \hat{M}_1 \hat{P}_1^\top) x_{t_i}\| \right) \\ &\leq \|P_1^\top - \hat{P}_1^\top\| \|A\| + \|M_1 P_1^\top - \hat{M}_1 \hat{P}_1^\top\| + \|M_1 \hat{P}_1^\top - \hat{M}_1 \hat{P}_1^\top\| \\ &< \|A\| \delta + \|M_1\| \|P_1^\top - \hat{P}_1^\top\| + \|M_1 - \hat{M}_1\| \\ &< \|A\| \delta + \|A\| \delta + 2\|A\| \delta = 4\|A\| \delta,\end{aligned}$$

772 where we repeatedly apply Corollary 5.2 and the fact that  $\|M_1\| \leq \|A\|$ . Then, to bound the error  
773 of the whole matrix, we simply apply the definition

$$\|\hat{B}_1 - B_1\| = \max_{\|u\|=1} \|(\hat{B}_1 - B_1)u\| \leq \max_{\|u\|=1} \sum_{i=1}^k |u_i| \|\hat{b}_i - b_i\| < 4\|A\|\sqrt{k}\delta.$$

774 This completes the proof. □

775 **Corollary F.1.** *Under the premises of Theorem 4.2, when (13) holds,  $\|\hat{K}_1\| < \frac{2\|A\|}{c\|B\|}$ .*

776 *Proof.* By Proposition F.1, it is evident that

$$\sigma_{\min}(\hat{B}_1) \geq \sigma_{\min}(B_1) - \|\hat{B}_1 - B_1\| > (c - 4\|A\|\sqrt{k}\delta)\|B\| > \frac{c}{2}\|B\|,$$

777 where the last inequality requires

$$\delta < \frac{c}{8\|A\|\sqrt{k}}. \quad (13)$$

778 Recall that  $\hat{K}_1 = \hat{B}_1^{-1} \hat{M}_1$ , and note that  $\|\hat{B}_1^{-1}\| \leq \frac{1}{\sigma_{\min}(\hat{B}_1)}$ , so we have

$$\|\hat{K}_1\| = \|\hat{B}_1^{-1} \hat{M}_1\| \leq \frac{\|\hat{P}_1^\top A \hat{P}_1\|}{\sigma_{\min}(\hat{B}_1)} < \frac{2\|A\|}{c\|B\|}.$$

779 This completes the proof. □

780 Recall that to apply Lemma 5.3, we need a bound on the spectral radii of diagonal blocks. The  
781 top-left block has already been eliminated to approximately  $\mathbf{0}$  by the design of  $\hat{K}_1$ , but the bottom-  
782 right block needs some extra work — although  $M_2$  is known to be stable, the inaccurate projection  
783 introduces an extra error that perturbs the spectrum. To bound the perturbed spectral radius, we will  
784 apply the following perturbation bound known as Bauer-Fike Theorem.

785 **Lemma F.2** (Bauer-Fike). *Suppose  $A \in \mathbb{R}^{n \times n}$  is diagonalizable, then for any  $E \in \mathbb{R}^{n \times n}$ , we have*

$$|\rho(A) - \rho(A + E)| \leq \max_{\hat{\lambda} \in \lambda(A+E)} \min_{\lambda \in \lambda(A)} |\lambda - \hat{\lambda}| \leq \kappa_d(A) \|E\|,$$

786 where  $\kappa_d(A)$  is the condition number of the matrix consisting of  $A$ 's eigenvectors as columns (i.e.,  
787 if  $A = SAS^{-1}$  with diagonal  $\Lambda$ , then  $\kappa_d(A) = \text{cond}(S)$ ), and  $\lambda(A)$  denotes the spectrum of  $A$ .

788 *Proof.* The proof is well-known and can be found in, e.g., [55]. □

789 Now we are ready to prove the main theorem for any symmetric dynamical matrix  $A$ .

790 *Proof of Theorem 4.2.* With  $\tau = 1$ , the controlled dynamics under estimated controller  $\hat{K}_1$  becomes

$$\hat{L}_1 = \begin{bmatrix} M_1 + P_1^\top B \hat{K}_1 \hat{P}_1^\top P_1 & P_1^\top B \hat{K}_1 \hat{P}_1^\top P_2 \\ P_2^\top B \hat{K}_1 \hat{P}_1^\top P_1 & M_2 + P_2^\top B \hat{K}_1 \hat{P}_1^\top P_2 \end{bmatrix}.$$

791 We first guarantee that the diagonal blocks are stable. For the top-left block,

$$\begin{aligned}
\|M_1 + P_1^\top B \hat{K}_1\| &= \|M_1 - B_1 \hat{B}_1^{-1} \hat{M}_1 \hat{P}_1^\top P_1\| \\
&\leq \|M_1 - \hat{M}_1\| + \|\hat{M}_1 - B_1 \hat{B}_1^{-1} \hat{M}_1\| + \|B_1 \hat{B}_1^{-1} \hat{M}_1 (I_k - \hat{P}_1^\top P_1)\| \\
&\leq \|M_1 - \hat{M}_1\| + \|\hat{B}_1 - B_1\| \|\hat{K}_1\| + \|B\| \|\hat{K}_1\| \|I_k - \hat{P}_1^\top P_1\| \\
&< 2\|A\|\delta + \frac{8\|A\|^2 \sqrt{k}}{c\|B\|} \delta + \frac{2\|A\|}{c} \delta \\
&= \frac{2(4\sqrt{k}\|A\| + (c+1)\|B\|)\|A\|}{c\|B\|} \delta,
\end{aligned} \tag{14}$$

792 where in (14) we apply Corollary 5.2, Corollary F.1, and Proposition E.1. Meanwhile, for the  
793 bottom-right block, note that the norm of the error term is bounded by

$$\|P_2^\top B \hat{K}_1 \hat{P}_1^\top P_2\| \leq \|B\| \|\hat{B}_1^{-1}\| \|\hat{M}_1\| \|\hat{P}_1^\top P_2\| \leq \frac{2\|A\|}{c} \delta.$$

794 Hence, by Lemma F.2, the spectral radius of the bottom-right block is bounded by

$$\rho(M_2 + P_2^\top B \hat{K}_1 \hat{P}_1^\top P_2) \leq \rho(M_2) + \frac{2}{c} \kappa_d(M_2) \|A\| \delta < 1,$$

795 where we require (recall that  $\rho(M_2) = |\lambda_{k+1}|$ )

$$\delta < \frac{c(1 - |\lambda_{k+1}|)}{2\kappa_d(M_2)\|A\|}. \tag{15}$$

796 To apply the lemma, it only suffices to bound the spectral norms of off-diagonal blocks. Note that  
797 the top-right block is bounded by

$$\|P_1^\top B \hat{K}_1 \hat{P}_1^\top P_2\| \leq \|B\| \|\hat{K}_1\| \|\hat{P}_1^\top P_2\| < \frac{2\|A\|}{c} \delta,$$

798 and the bottom-left block is bounded by

$$\|P_2^\top B \hat{K}_1 \hat{P}_1^\top P_1\| \leq \|B\| \|\hat{K}_1\| \leq \frac{2\|A\|}{c}.$$

799 Now, by Lemma 5.3, we can guarantee that

$$\rho(\hat{L}_1) \leq \max \left\{ \frac{2(4\sqrt{k}\|A\| + 2(c+1)\|B\|)\|A\|}{c\|B\|} \delta, |\lambda_{k+1}| + \|B\| \|\hat{K}_1\| \delta \right\} + \frac{4\|A\|^2 \chi(\hat{L}_1)}{c^2} \delta < 1,$$

800 where we require

$$\delta < \min \left\{ \frac{1}{\frac{2(4\sqrt{k}\|A\| + 2(c+1)\|B\|)\|A\|}{c\|B\|} + \frac{4\|A\|^2 \chi(\hat{L}_1)}{c^2}}, \frac{1 - |\lambda_{k+1}|}{\frac{2\|A\|}{c} + \frac{4\|A\|^2 \chi(\hat{L}_1)}{c^2}} \right\}. \tag{16}$$

801 So far, it is still left to recollect all the constraints we need on  $\delta$  (see (13), (15) and (16)), i.e.,

$$\delta < \min \left\{ \frac{c}{8\|A\|\sqrt{k}}, \frac{c(1 - |\lambda_{k+1}|)}{2\kappa_d(M_2)\|A\|}, \frac{1 - |\lambda_{k+1}|}{\frac{2\|A\|}{c} + \frac{4\|A\|^2 \chi(\hat{L}_1)}{c^2}}, \frac{1}{\frac{2(4\sqrt{k}\|A\| + 2(c+1)\|B\|)\|A\|}{c\|B\|} + \frac{4\|A\|^2 \chi(\hat{L}_1)}{c^2}} \right\},$$

802 which can be simplified (but weakened) to

$$\delta < \frac{c^2(1 - |\lambda_{k+1}|)}{16\sqrt{k}\kappa_d(M_2)\|A\|(\|A\| + \|B\|)\chi(\hat{L}_1)} = O(k^{-1/2}). \tag{17}$$

803 We shall rewrite the bound equivalently in terms of  $t_0$  (recall (10) in Appendix E) as

$$t_0 > \frac{\log(cn^2 \binom{n}{k}) - \log \frac{c^2(1 - |\lambda_{k+1}|)}{16\sqrt{k}\kappa_d(M_2)\|A\|(\|A\| + \|B\|)\chi(\hat{L}_1)}}{2 \log \frac{|\lambda_k|}{|\lambda_{k+1}|}} = O \left( \frac{k \log n}{\log \frac{|\lambda_k|}{|\lambda_{k+1}|}} \right), \tag{18}$$

804 since  $\kappa_d(A) = 1$ . This completes the proof of Theorem 4.2.  $\square$

## G Proof of the Main Theorem

For the general case, the analysis becomes more challenging for two reasons: on the one hand, we have to apply  $\tau$ -hop control with  $\tau$  possibly larger than 1, which potentially increases the norm of  $B_\tau$  and  $\hat{K}_1$ ; on the other hand, the top-right corner will no longer be  $O(\delta)$  with a non-zero  $\Delta$  (in fact,  $\Delta_\tau$  is in the order of  $|\lambda_1|^\tau$  that grows exponentially with respect to  $\tau$ ). To settle these issues, we first introduce two key observations on bounds of major factors:

- (1) For an arbitrary matrix  $X$ , although  $\|X\|$  might be significantly larger than  $\rho(X)$ , we always have  $\|X^t\| = O(\rho(X)^t)$  when  $t$  is large enough. This is formally proven as Gelfand's Formula (see Lemma G.1), and helps to establish bounds like  $\|M_1\| = O(|\lambda_1|^\tau)$ ,  $\|M_2\| = O(|\lambda_{k+1}|^\tau)$ ,  $\|\Delta_\tau\| = O(|\lambda_1|^\tau)$ ,  $\|P_2^\top A^{\tau-1}\| = O(|\lambda_{k+1}|^\tau)$ , and  $\|\hat{M}_1^\tau - M_1^\tau\| = O(|\lambda_1|^\tau \delta)$ .
- (2) When the system runs with 0 control inputs for a long period (specifically, for  $\omega$  time steps), eventually we will see the unstable component expanding and the stable component shrinking, and consequently  $\frac{\|P_2^\top A^{\omega} x\|}{\|A^{\omega} x\|} = O(|\lambda_k|^{-\omega})$ . This cancels out the exponentially exploding  $\|\Delta_\tau\|$ , and helps to establish the estimation bound  $\|\hat{B}_\tau - B_\tau\| = O(|\lambda_1|^\tau \delta)$ .

With these in hand, we are ready to upper bound the norms of the blocks in  $\hat{L}_\tau$ :

- (1) *The top-left and bottom-right blocks:* similar to the warm-up case, only to note that dynamical matrices are lifted to their  $\tau^{\text{th}}$  power, and thus  $\|\hat{B}_\tau - B_\tau\|$  carries an additional factor of  $|\lambda_1|^\tau$ .
- (2) *The bottom-left block:*  $P_2^\top A^{\tau-1}$  contributes an  $O(|\lambda_{k+1}|^\tau)$  factor that decays exponentially, while  $\hat{K}_1$  contributes an  $O(|\lambda_1|^\tau)$  factor that explodes exponentially. The overall bound is in the order of  $O(|\lambda_1 \lambda_{k+1} / \lambda_k|^\tau)$ , and decays with respect to  $\tau$  if  $|\lambda_1 \lambda_{k+1}| < 1$ .
- (3) *The top-right block:* the first term is in the order of  $O(|\lambda_1|^\tau)$ , and the second term is in the order of  $O(|\lambda_1 \lambda_{k+1} / \lambda_k|^\tau \delta)$ . This block is in the order of  $O(|\lambda_1|^\tau)$  when  $\delta$  is small enough.

Therefore, the closed-loop dynamical matrix is actually in the order of

$$\hat{L}_\tau = \begin{bmatrix} O(|\lambda_1|^{2\tau} \delta) & O(|\lambda_1|^\tau + |\lambda_1 \lambda_{k+1} / \lambda_k|^\tau \delta) \\ O(|\lambda_1 \lambda_{k+1} / \lambda_k|^\tau) & O(|\lambda_{k+1}|^\tau + |\lambda_1 \lambda_{k+1}|^\tau \delta) \end{bmatrix}. \quad (19)$$

Finally, by Lemma 5.3, asymptotic stability is guaranteed when  $|\lambda_1|^2 |\lambda_{k+1}| < |\lambda_k|$  (i.e., the norm of the bottom-left block decays faster than the norm of the top-right block grows), in which case we can set  $\tau$  to be some constant determined by  $A$  and  $B$ , and  $\delta$  in the order of  $O(|\lambda_1|^{-2\tau})$ .

Technically, we would like to bound the spectral radius of the matrix

$$\hat{L}_\tau = \begin{bmatrix} M_1^\tau + P_1^\top A^{\tau-1} B \hat{K}_1 \hat{P}_1^\top P_1 & \Delta_\tau + P_1^\top A^{\tau-1} B \hat{K}_1 \hat{P}_1^\top P_2 \\ P_2^\top A^{\tau-1} B \hat{K}_1 \hat{P}_1^\top P_1 & M_2^\tau + P_2^\top A^{\tau-1} B \hat{K}_1 \hat{P}_1^\top P_2 \end{bmatrix}$$

using Lemma 5.3. The proof is split into two major building blocks: on the one hand, we introduce the well-known Gelfand's Formula to bound matrices appearing with exponents; on the other hand, we establish the estimation error bound for  $B_\tau$  (parallel to Lemma F.1) and proceed to bound  $\|\hat{K}_1\|$ , for which we rely on the instability results shown in Section G.2. Finally, a combination of these building blocks naturally establishes the main theorem.

### G.1 Gelfand's Formula

In this section, we will show norm bounds for factors that contain matrix exponents. It is natural to apply the well-known Gelfand's formula as stated below.

**Lemma G.1** (Gelfand's formula). *For any square matrix  $X$ , we have*

$$\rho(X) = \lim_{t \rightarrow \infty} \|X^t\|^{1/t}. \quad (20)$$

*In other words, for any  $\varepsilon > 0$ , there exists a constant  $\zeta_\varepsilon(X)$  such that*

$$\sigma_{\max}(X^t) = \|X^t\| \leq \zeta_\varepsilon(X) (\rho(X) + \varepsilon)^t. \quad (21)$$

*Further, if  $X$  is invertible, let  $\lambda_{\min}(X)$  denote the eigenvalue of  $X$  with minimum modulus, then*

$$\sigma_{\min}(X^t) \geq \frac{1}{\zeta_\varepsilon(X^{-1})} \left( \frac{|\lambda_{\min}(X)|}{1 + \varepsilon |\lambda_{\min}(X)|} \right)^t. \quad (22)$$

843 *Proof.* The proof of (20) can be easily found in existing literature (e.g., [56], Corollary 5.6.14), and  
 844 (21) follows by the definition of limits. For (22), note that

$$\sigma_{\min}(X^t) = \frac{1}{\sigma_{\max}((X^{-1})^t)} \geq \frac{1}{\zeta_{\varepsilon}(X^{-1})(\rho(X^{-1}) + \varepsilon)^t} = \frac{1}{\zeta_{\varepsilon}(X^{-1})} \left( \frac{|\lambda_{\min}(X)|}{1 + \varepsilon|\lambda_{\min}(X)|} \right)^t,$$

845 where we apply  $\sigma_{\min}(X^t) = \sigma_{\max}((X^{-1})^t)^{-1}$  and  $\rho(X^{-1}) = |\lambda_{\min}(X)|^{-1}$ .  $\square$

846 It is evident that  $\rho(A) = \rho(M_1) = \rho(N_1) = |\lambda_1|$ ,  $\lambda_{\min}(M_1) = \lambda_{\min}(N_1) = |\lambda_k|$  and  $\rho(M_2) =$   
 847  $\rho(N_2) = |\lambda_{k+1}|$  (recall that  $M_1$  and  $M_2$  inherits the unstable and stable eigenvalues, respectively).  
 848 Therefore, we can use Gelfand's formula to bound the relevant factors appearing in  $\hat{L}_{\tau}$ .

849 **Proposition G.1.** *Under the premises of Theorem 4.1, the following results hold for any  $t \in \mathbb{N}$ :*

- 850 (1)  $\|B_t\| \leq \zeta_{\varepsilon_1}(A)(|\lambda_1| + \varepsilon_1)^{t-1}\|B\|$ ;
- 851 (2)  $\|P_2^{\top} A^t\| \leq \zeta_{\varepsilon_2}(M_2)(|\lambda_{k+1}| + \varepsilon_2)^t$ ;
- 852 (3)  $\|\Delta_t\| \leq C_{\Delta}(|\lambda_1| + \varepsilon_1)^t$ , where  $C_{\Delta} = \zeta_{\varepsilon_1}(M_1)\zeta_{\varepsilon_2}(M_2) \frac{(2-\xi)\sqrt{2\xi}\|A\|}{1-\xi} \frac{2|\lambda_{k+1}|}{|\lambda_1| + \varepsilon_1 - |\lambda_{k+1}| - \varepsilon_2}$ .
- 853 Here (and below)  $\varepsilon_1$  and  $\varepsilon_2$  are selected to be sufficiently small constants (see (47)).

854 *Proof.* (1) This is a direct corollary of Gelfand's Formula, since

$$\|B_t\| = \|P_1^{\top} A^{t-1} B\| \leq \|A^{t-1}\| \|B\| \leq \zeta_{\varepsilon_1}(A)(|\lambda_1| + \varepsilon_1)^{t-1} \|B\|.$$

855 (2) It only suffices to recall  $\rho(M_2) = |\lambda_{k+1}|$ , and note that

$$P_2^{\top} A^t = P_2^{\top} P M^t P^{-1} = [0 \ I_{n-k}] M^t P^{\top} = M_2^t P_2^{\top}.$$

856 Hence by Gelfand's formula we have  $\|P_2^{\top} A^t\| = \|M_2^t\| \leq \zeta_{\varepsilon_2}(M_2)(|\lambda_{k+1}| + \varepsilon_2)^t$ .

857 (3) This is a direct corollary of Lemma A.1(4) and Gelfand's formula, since

$$\begin{aligned} \|\Delta_t\| &= \left\| \sum_i M_1^i \Delta M_2^{t-1-i} \right\| \leq \|\Delta\| \sum_i \|M_1^i\| \|M_2^{t-1-i}\| \\ &\leq \zeta_{\varepsilon_1}(M_1) \zeta_{\varepsilon_2}(M_2) \frac{(2-\xi)\sqrt{2\xi}\|A\|}{1-\xi} \sum_i (\varepsilon_1 + |\lambda_1|)^i (|\lambda_{k+1}| + \varepsilon_2)^{t-1-i} \\ &= C_{\Delta}(|\lambda_1| + \varepsilon_1)^t. \end{aligned}$$

858 This finishes the proof of the proposition.  $\square$

859 **Proposition G.2.** *Under the premises of Theorem 4.1,*

$$\|\hat{M}_1^{\tau} - M_1^{\tau}\| < 2\tau\|A\|\zeta_{\varepsilon_1}(A)^2(|\lambda_1| + \varepsilon_1)^{\tau-1}\delta.$$

860 *Proof.* Recall that Corollary 5.2 gives  $\|M_1 - \hat{M}_1\| < 2\|A\|\delta$ . Meanwhile, by Gelfand's Formula,

$$\begin{aligned} \|M_1^t\| &= \|P^{\top} A^t P\| \leq \|A^t\| \leq \zeta_{\varepsilon_1}(A)(|\lambda_1| + \varepsilon_1)^t, \\ \|\hat{M}_1^t\| &= \|\hat{P}^{\top} A^t \hat{P}\| \leq \|A^t\| \leq \zeta_{\varepsilon_1}(A)(|\lambda_1| + \varepsilon_1)^t. \end{aligned}$$

861 Then we have the following bound by telescoping

$$\begin{aligned} \|M_1^{\tau} - \hat{M}_1^{\tau}\| &= \left\| \sum_{i=1}^{\tau} (M_1^i \hat{M}_1^{\tau-i} - M_1^{i-1} \hat{M}_1^{\tau-i+1}) \right\| \\ &\leq \sum_{i=1}^{\tau} \|M_1^{i-1}\| \|\hat{M}_1^{\tau-i}\| \|M_1 - \hat{M}_1\| \\ &< \tau \cdot \zeta_{\varepsilon_1}(A)^2(|\lambda_1| + \varepsilon_1)^{\tau-1} \cdot 2\|A\|\delta \\ &= 2\tau\|A\|\zeta_{\varepsilon_1}(A)^2(|\lambda_1| + \varepsilon_1)^{\tau-1}\delta. \end{aligned}$$

862 This finishes the proof.  $\square$

863 **Corollary G.2.** *Under the premises of Theorem 4.1, when  $\delta < \frac{1}{\tau}$ ,*

$$\|\hat{M}_1^\tau\| < (\zeta_{\varepsilon_1}(M_1)(|\lambda_1| + \varepsilon_1) + 2\|A\|\zeta_{\varepsilon_1}(A))(|\lambda_1| + \varepsilon_1)^{\tau-1}.$$

864 *Proof.* A combination of Gelfand's Formula and Proposition G.2 yields

$$\begin{aligned} \|\hat{M}_1^\tau\| &\leq \|M_1^\tau\| + \|\hat{M}_1^\tau - M_1^\tau\| \\ &\leq \zeta_{\varepsilon_1}(M_1)(|\lambda_1| + \varepsilon_1)^\tau + 2\tau\|A\|\zeta_{\varepsilon_1}(A)^2(|\lambda_1| + \varepsilon_1)^{\tau-1}\delta \\ &< (\zeta_{\varepsilon_1}(M_1)(|\lambda_1| + \varepsilon_1) + 2\tau\|A\|\zeta_{\varepsilon_1}(A)\delta)(|\lambda_1| + \varepsilon_1)^{\tau-1}, \end{aligned}$$

865 where the last inequality requires  $\delta < \frac{1}{\tau}$ . This completes the proof.  $\square$

## 866 G.2 Instability of the Unstable Component

867 We have been referring to  $E_s$  (and approximately,  $E_u^\perp$ ) as “stable”, and  $E_u$  as “unstable”. This leads  
868 us to think that the unstable component will constitute an increasing proportion of the state as the  
869 system evolves with zero control input. However, in some cases it might happen that the proportion  
870 of unstable component does not increase within the first few time steps, although eventually it will  
871 explode. This motivates us to formally characterize such instability of the unstable component.

872 In this section, we aim to establish a fundamental property of  $A^\omega$  (for large enough  $\omega$ , of course)  
873 that it “almost surely” increases the norm of the state. By “almost surely” we mean that the initial  
874 state should have non-negligible unstable component, which happens with probability  $1 - \varepsilon$  when  
875 we uniformly sample the initial state from the surface of unit hyper-sphere in  $\mathbb{R}^n$ .

876 Throughout this section, we use  $\gamma$  to denote the ratio of the unstable component over the stable  
877 component within some state  $x$  (i.e.,  $\frac{\|R_1x\|}{\|R_2x\|}$ ). Note that

$$x = \Pi_u x + \Pi_s x = Q_1 R_1 x + Q_2 R_2 x,$$

878 where  $Q_1, Q_2$  are orthonormal. Hence

$$\|R_1x\| - \|R_2x\| \leq \|x\| \leq \|R_1x\| + \|R_2x\|.$$

879 As a consequence, when  $\frac{\|R_1x\|}{\|R_2x\|} > \gamma > 1$ , we also know that

$$\frac{\|R_1x\|}{\|x\|} \geq \frac{\|R_1x\|}{\|R_1x\| + \|R_2x\|} > \frac{\gamma}{\gamma + 1}, \quad \frac{\|R_2x\|}{\|x\|} \leq \frac{\|R_2x\|}{\|R_1x\| - \|R_2x\|} < \frac{1}{\gamma - 1}.$$

880 The following results are presented to fit in the framework of an inductive proof. We first establish  
881 the inductive step, where Proposition G.3 shows that the unstable component eventually becomes  
882 dominant with a non-negligible initial  $\gamma$ , and Proposition G.4 shows that the unstable component will  
883 still constitute a non-negligible part after a control input of mild magnitude is injected. Meanwhile,  
884 Proposition G.5 shows that the initial unstable component is non-negligible with large probability.

885 **Proposition G.3.** *Given a dynamical matrix  $A$  and some constant  $\gamma > 0$ , for any state  $x$  such that*  
886  *$\frac{\|R_1x\|}{\|R_2x\|} > \gamma$ , for any  $\omega \in \mathbb{N}$ , we have*

$$\frac{\|R_1A^\omega x\|}{\|R_2A^\omega x\|} > \gamma_\omega := C_\gamma \left( \frac{|\lambda_k|}{(1 + \varepsilon_3|\lambda_k|)(|\lambda_{k+1}| + \varepsilon_2)} \right)^\omega,$$

887 where  $C_\gamma := \frac{1}{(1 + \frac{1}{\gamma})\zeta_{\varepsilon_3}(N_1^{-1})\zeta_{\varepsilon_2}(N_2)\|R_2\|}$  is a constant related to  $\gamma$ . Specifically, for any  $\gamma_+ > 0$ ,

888 there exists a constant  $\omega_0(\gamma, \gamma_+) = O(\log \frac{\gamma_+}{\gamma})$ , such that for any  $\omega > \omega_0(\gamma, \gamma_+)$ ,  $\frac{\|R_1x\|}{\|R_2x\|} > \gamma_+$ .

889 *Proof.* Recall that  $R_1A^\omega = N_1^\omega R_1$  and  $R_2A^\omega = N_2^\omega R_2$ . By Gelfand's Formula we have

$$\begin{aligned} \frac{\|R_1A^\omega x\|}{\|R_2A^\omega x\|} &= \frac{\|N_1^\omega R_1x\|}{\|N_2^\omega R_2x\|} \geq \frac{\sigma_{\min}(N_1^\omega)\|R_1x\|}{\|N_2^\omega\|\|R_2\|\|x\|} > \frac{\sigma_{\min}(N_1^\omega)}{(1 + \frac{1}{\gamma})\|N_2^\omega\|\|R_2\|} \\ &\geq \frac{(|\lambda_k|/(1 + \varepsilon_3|\lambda_k|))^\omega}{(1 + \frac{1}{\gamma})\zeta_{\varepsilon_3}(N_1^{-1})\zeta_{\varepsilon_2}(N_2)(|\lambda_{k+1}| + \varepsilon_2)^\omega\|R_2\|} \end{aligned}$$

$$= \frac{1}{(1 + \frac{1}{\gamma})\zeta_{\varepsilon_3}(N_1^{-1})\zeta_{\varepsilon_2}(N_2)\|R_2\|} \left( \frac{|\lambda_k|}{(1 + \varepsilon_3|\lambda_k|)(|\lambda_{k+1}| + \varepsilon_2)} \right)^\omega.$$

Therefore, we shall take

$$\omega_0(\gamma, \gamma_+) = \frac{\log \gamma_+ / C_\gamma}{\log(|\lambda_k|) / ((1 + \varepsilon_3|\lambda_k|)(|\lambda_{k+1}| + \varepsilon_2))} = O\left(\log \frac{\gamma_+}{\gamma}\right),$$

and the proof is completed.  $\square$

**Corollary G.3.** Under the premises of Proposition G.3, for any  $\omega > \omega_0(\gamma, \gamma_+)$ ,

$$\frac{\|P_1^\top A^\omega x\|}{\|A^\omega x\|} > 1 - \frac{2}{\gamma_\omega - 1}, \quad \frac{\|P_2^\top A^\omega x\|}{\|A^\omega x\|} < \frac{1}{\gamma_\omega - 1}.$$

*Proof.* Note that we have decomposition  $x = \Pi_u x + \Pi_1 \Pi_s x + \Pi_2 \Pi_s x$ , where  $\|\Pi_u x\| = \|R_1 x\|$  and  $\|\Pi_s x\| = \|R_2 x\|$ . Hence, for any  $\omega > \omega_0(\gamma, \gamma_+)$ , we can show that

$$\begin{aligned} \frac{\|P_1^\top A^\omega x\|}{\|A^\omega x\|} &= \frac{\|\Pi_u A^\omega x + \Pi_1 \Pi_s A^\omega x\|}{\|A^\omega x\|} \\ &\geq \frac{\|\Pi_u A^\omega x\| - \|\Pi_1 \Pi_s A^\omega x\|}{\|A^\omega x\|} \\ &\geq \frac{\|R_1 A^\omega x\| - \|R_2 A^\omega x\|}{\|A^\omega x\|} \\ &> \frac{\gamma_\omega}{\gamma_\omega + 1} - \frac{1}{\gamma_\omega - 1} > 1 - \frac{2}{\gamma_\omega - 1}, \end{aligned}$$

and similarly,

$$\frac{\|P_2^\top A^\omega x\|}{\|A^\omega x\|} = \frac{\|\Pi_2 \Pi_s A^\omega x\|}{\|A^\omega x\|} \leq \frac{\|\Pi_s A^\omega x\|}{\|A^\omega x\|} < \frac{1}{\gamma_\omega - 1}.$$

The proof is completed.  $\square$

**Proposition G.4.** Given dynamical matrices  $A, B$  and constants  $\gamma > 0, \gamma_+ > 1$ , for any state  $x$  such that  $\frac{\|R_1 x\|}{\|R_2 x\|} > \gamma_+$ , suppose we feed a control input  $\|u\| \leq \alpha \|x\|$  and observe the next state  $x' = Ax + Bu$ , where  $\alpha$  satisfies

$$\alpha < \frac{\frac{\gamma_+}{\gamma_+ + 1} \sigma_{\min}(M_1) - \frac{\gamma}{\gamma_+ - 1} \frac{1}{1 - \xi} \|A\|}{(1 + \frac{\sqrt{2\xi}}{1 - \xi} + \frac{\gamma}{1 - \xi}) \|B\|}. \quad (23)$$

Then we can guarantee that  $\frac{\|R_1 x'\|}{\|R_2 x'\|} > \gamma$ .

*Proof.* The proposition can be shown by direct calculation. Let  $z = Rx = [z_1^\top, z_2^\top]^\top$ . Recall that

$$Rx' = z' = \begin{bmatrix} N_1 z_1 + R_1 B u \\ N_2 z_2 + R_2 B u \end{bmatrix},$$

and note that  $\frac{\|z_1\|}{\|x\|} > \frac{\gamma_+}{\gamma_+ + 1}$ ,  $\frac{\|z_2\|}{\|x\|} < \frac{1}{\gamma_+ - 1}$  under the assumptions, so we have

$$\begin{aligned} \frac{\|R_1 x'\|}{\|R_2 x'\|} &= \frac{\|N_1 z_1 + R_1 B u\|}{\|N_2 z_2 + R_2 B u\|} \geq \frac{\|N_1 z_1\| - \|R_1 B u\|}{\|N_2 z_2\| + \|R_2 B u\|} \\ &\geq \frac{\sigma_{\min}(N_1) \|z_1\| - \|R_1 B\| \|u\|}{\|N_2\| \|z_2\| + \|R_2 B\| \|u\|} \\ &\geq \frac{\sigma_{\min}(N_1) \frac{\gamma_+}{\gamma_+ + 1} \|x\| - \alpha \|R_1\| \|B\| \|x\|}{\|N_2\| \frac{1}{\gamma_+ - 1} \|x\| + \alpha \|R_2\| \|B\| \|x\|} \\ &\geq \frac{\sigma_{\min}(M_1) \frac{\gamma_+}{\gamma_+ + 1} \|x\| - \alpha (1 + \frac{\sqrt{2\xi}}{1 - \xi}) \|B\| \|x\|}{\frac{1}{1 - \xi} \|A\| \frac{1}{\gamma_+ - 1} \|x\| + \alpha \frac{1}{1 - \xi} \|B\| \|x\|} \\ &> \gamma, \end{aligned}$$

where we apply Lemma A.1 and the convention of taking  $N_1 = M_1$ .  $\square$

904 **Proposition G.5.** Suppose a state  $x$  is sampled uniformly randomly from the unit hyper-sphere  
 905 surface  $\mathbb{B}_n \subset \mathbb{R}^n$ , then for any constant  $\gamma < \min \left\{ \frac{1}{2}, \frac{1}{\sqrt{2/(\sigma_{\min}(R_1)k)+1}} \right\}$ , we have

$$\Pr_{x \sim \mathcal{U}(\mathbb{B}_n)} \left[ \frac{\|R_1 x\|}{\|R_2 x\|} > \gamma \right] > 1 - \theta(\gamma),$$

906 where  $\theta(\gamma) = \frac{8\sqrt{2}}{B(\frac{1}{2}, \frac{n-1}{2})\sqrt{\sigma_{\min}(R_1)}}\gamma = O(\gamma)$  is a constant bounded linearly by  $\gamma$ .

907 *Proof.* Note that

$$\|R_1 x\| > \frac{\gamma}{1-\gamma}\|x\| \Rightarrow \|R_2 x\| < \|x\| + \|R_1 x\| < \frac{1}{1-\gamma}\|x\| \Rightarrow \frac{\|R_1 x\|}{\|R_2 x\|} > \gamma.$$

908 so we only have to show that  $\Pr_{x \sim \mathcal{U}(\mathbb{B}_n)} \left[ \frac{\|R_1 x\|}{\|R_2 x\|} \leq \frac{\gamma}{1-\gamma} \right] < \theta(\gamma)$ . Now let  $R_1^\top R_1 = S^\top D S$  be the  
 909 eigen-decomposition of  $R_1^\top R_1$ , where  $S$  is selected to be orthonormal such that

$$D = \text{diag}(d_1, \dots, d_k, 0, \dots, 0).$$

910 Note that the vector  $y = Sx =: [y_1, \dots, y_n]$  also obeys a uniform distribution over  $\mathbb{B}_n$ , so we have

$$\begin{aligned} \Pr \left[ \|R_1 x\| \leq \frac{\gamma}{1-\gamma} \|x\| \right] &= \Pr \left[ x^\top R_1^\top R_1 x \leq \left( \frac{\gamma}{1-\gamma} \right)^2 \right] = \Pr \left[ y^\top D y \leq \left( \frac{\gamma}{1-\gamma} \right)^2 \right] \\ &\leq \Pr \left[ d_i y_i^2 \leq \frac{1}{k} \left( \frac{\gamma}{1-\gamma} \right)^2, \forall i = 1, \dots, k \right] \\ &\leq \sum_{i=1}^k \Pr \left[ y_i^2 \leq \frac{1}{d_i k} \left( \frac{\gamma}{1-\gamma} \right)^2 \right]. \end{aligned}$$

911 It suffices to bound the probability  $\Pr_{y \sim \mathcal{U}(B)} [y_i^2 \leq \eta]$ . Note that  $y$  can be obtained by first sampling  
 912 a Gaussian random vector  $z \sim \mathcal{N}(0, I_n)$ , and then normalize it to get  $y = \frac{z}{\|z\|}$ . Hence

$$\Pr_{y \sim \mathcal{U}(\mathbb{B}_n)} [y_i^2 \leq \eta] = \Pr_{z \sim \mathcal{N}(0, I_n)} [z_i^2 \leq \eta \|z\|^2] = \Pr_{z \sim \mathcal{N}(0, I_n)} \left[ \frac{z_i^2}{\sum_{j \neq i} z_j^2} \leq \frac{\eta}{1-\eta} \right],$$

913 where  $w := \frac{z_i^2}{\sum_{j \neq i} z_j^2}$  is known to obey an F-distribution  $w \sim \mathcal{F}(1, n-1)$ . The c.d.f. of  $w$  is known  
 914 to be  $I_{w/(w+n-1)}(\frac{1}{2}, \frac{n-1}{2})$ , where  $I$  denotes the *regularized incomplete Beta function*. Note that

$$I_{w/(w+n-1)} \left( \frac{1}{2}, \frac{n-1}{2} \right) = \frac{2w^{1/2}}{(n-1)^{1/2} B(\frac{1}{2}, \frac{n-1}{2})} - \frac{nw^{3/2}}{3(n-1)^{3/2} B(\frac{1}{2}, \frac{n-1}{2})} + O(n^{5/2}),$$

915 it can be shown that  $I_{w/(w+n-1)}(\frac{1}{2}, \frac{n-1}{2}) < \frac{4\sqrt{w}}{\sqrt{n-1} B(\frac{1}{2}, \frac{n-1}{2})}$ . Hence

$$\Pr_{y \sim \mathcal{U}(\mathbb{B}_n)} [y_i^2 \leq \eta] = \Pr_{z \sim \mathcal{N}(0, I_n)} \left[ \frac{z_i^2}{\sum_{j \neq i} z_j^2} \leq \frac{\eta}{1-\eta} \right] < \frac{4\sqrt{\frac{\eta}{1-\eta}}}{\sqrt{n-1} B(\frac{1}{2}, \frac{n-1}{2})},$$

916 which further gives

$$\Pr \left[ \|R_1 x\| \leq \frac{\gamma}{1-\gamma} \|x\| \right] < \sum_{i=1}^k \frac{4\sqrt{\frac{2}{d_i k} \left( \frac{\gamma}{1-\gamma} \right)^2}}{\sqrt{n-1} B(\frac{1}{2}, \frac{n-1}{2})} < \frac{8\sqrt{2}}{B(\frac{1}{2}, \frac{n-1}{2})\sqrt{\sigma_{\min}(R_1)}}\gamma = O(\gamma)$$

917 where we require  $\gamma < \min \left\{ \frac{1}{2}, \frac{1}{\sqrt{2/(\sigma_{\min}(R_1)k)+1}} \right\}$ . □

918 Combining the previous three propositions, we have shown in an inductive way that the algorithm  
 919 guarantees  $\frac{\|P_2^\top x_{t_i}\|}{\|x_{t_i}\|}$  is constantly upper bounded at each time step  $t_i$  ( $i = 1, \dots, k$ ), which is critical  
 920 to the estimation error bound of  $B_\tau$ . This is concluded as the following lemma.



921 **Lemma G.4.** *Under the premises of Theorem 4.1, for any constants  $\omega, \gamma$  such that  $\omega < t_0$  and*  
 922  *$\gamma < \min \left\{ \frac{1}{2}, \frac{1}{\sqrt{2/(\sigma_{\min}(R_1)k)+1}} \right\}$ , the algorithm guarantees*

$$\frac{\|P_2^\top x_{t_i}\|}{\|x_{t_i}\|} < \frac{1}{\gamma_\omega - 1}, \quad \forall i = 1, \dots, k$$

923 *with probability  $1 - \theta(\gamma)$  over the initialization of  $x_0$  on the unit hyper-sphere surface  $\mathbb{B}_n$ , where*

$$\gamma_\omega := C_\gamma \left( \frac{|\lambda_k|}{(1 + \varepsilon_3 |\lambda_k|)(|\lambda_{k+1}| + \varepsilon_2)} \right)^\omega.$$

924 *Proof.* We proceed by showing that  $\frac{\|R_1 x_{t_i}\|}{\|R_2 x_{t_i}\|} > \gamma_\omega$  for  $i = 1, \dots, k$  in an inductive way.

925 For the base case, it is guaranteed by Proposition G.5 that  $x_0$  satisfies  $\frac{\|R_1 x_0\|}{\|R_2 x_0\|} > \gamma$  with probability  
 926  $1 - \theta(\gamma)$ , and Proposition G.3 further guarantees  $\frac{\|R_1 x_{t_1}\|}{\|R_2 x_{t_1}\|} > \gamma_\omega$ . Here we require  $t_0 > \omega$ .

927 For the inductive step, suppose we have shown  $\frac{\|R_1 x_{t_i}\|}{\|R_2 x_{t_i}\|} > \gamma_\omega$ . Since  $\|u_{t_i}\| = \alpha \|x_{t_i}\|$ , we have  
 928  $\frac{\|R_1 x_{t_i+1}\|}{\|R_2 x_{t_i+1}\|} > \gamma$  by Proposition G.4, and again Proposition G.3 guarantees  $\frac{\|R_1 x_{t_{i+1}}\|}{\|R_2 x_{t_{i+1}}\|} > \gamma_\omega$ .

929 Now it only suffices to apply Corollary G.3 to complete the proof.  $\square$

### 930 G.3 Estimation Error of $B_\tau$

931 **Proposition G.6.** *Under the premises of Theorem 4.1 and Lemma G.4, when (29) holds,*

$$\|\hat{B}_\tau - B_\tau\| < C_B(|\lambda_1| + \varepsilon_1)^{\tau-1} \delta,$$

932 *where  $C_B := \frac{2\sqrt{k}\zeta_{\varepsilon_1}(A)^2((2\tau+2)\|A\| + \|B\|)}{\alpha}$ .*

933 *Proof.* This is parallel to Lemma F.1. Note that we have to subtract an additional term (induced by  
 934 non-zero  $\Delta_\tau$  in  $M^\tau$ ) to calculate the actual  $b_i$ , so we have

$$\begin{aligned} \|b_i - \hat{b}_i\| &= \frac{1}{\alpha \|x_{t_i}\|} \left\| (P_1^\top x_{t_i+\tau} - M_1^\tau P_1^\top x_{t_i} - \Delta_\tau P_2^\top x_{t_i}) - (\hat{P}_1^\top x_{t_i+\tau} - \hat{M}_1^\tau \hat{P}_1^\top x_{t_i}) \right\| \\ &\leq \frac{1}{\alpha \|x_{t_i}\|} \left( \|(P_1 - \hat{P}_1)^\top (A^\tau x_{t_i} + B_\tau u_{t_i})\| + \|M_1^\tau P_1^\top x_{t_i} - \hat{M}_1^\tau \hat{P}_1^\top x_{t_i}\| + \|\Delta_\tau P_2^\top x_{t_i}\| \right) \\ &< \frac{1}{\alpha} (\zeta_{\varepsilon_1}(A)^2(|\lambda_1| + \varepsilon_1)^{\tau-1}((2\tau+2)\|A\| + \|B\|)\delta + \delta). \end{aligned}$$

935 Here the first term is bounded by

$$\begin{aligned} \|(P_1 - \hat{P}_1)^\top (A^\tau x_{t_i} + B_\tau u_{t_i})\| &\leq \|P_1 - \hat{P}_1\|(\|A^\tau\| + \|A^{\tau-1}B\|)\|x_{t_i}\| \\ &< \|x_{t_i}\|\zeta_{\varepsilon_1}(A)(|\lambda_1| + \varepsilon_1)^{\tau-1}(\|A\| + \|B\|)\delta, \end{aligned}$$

936 where in the last inequality we apply Corollary 5.2; the second term is bounded by

$$\begin{aligned} \|M_1^\tau P_1^\top x_{t_i} - \hat{M}_1^\tau \hat{P}_1^\top x_{t_i}\| &\leq (\|M_1^\tau (P_1^\top - \hat{P}_1^\top)\| + \|(M_1^\tau - \hat{M}_1^\tau) \hat{P}_1^\top\|)\|x_{t_i}\| \\ &< (\zeta_{\varepsilon_1}(A)(|\lambda_1| + \varepsilon_1)^{\tau-1}\|A\|\delta \\ &\quad + 2\tau\|A\|\zeta_{\varepsilon_1}(A)^2(|\lambda_1| + \varepsilon_1)^{\tau-1}\delta)\|x_{t_i}\| \end{aligned} \quad (24)$$

$$\leq \|x_{t_i}\|\zeta_{\varepsilon_1}(A)^2(|\lambda_1| + \varepsilon_1)^{\tau-1}(2\tau+1)\|A\|\delta, \quad (25)$$

937 where in (24) we apply Proposition G.2, and in (25) we apply a simple fact that  $\zeta_{\varepsilon_1}(A) \geq 1$ ; the  
 938 third term is bounded by

$$\frac{\|\Delta_\tau\| \|P_2^\top x_{t_i}\|}{\|x_{t_i}\|} \leq \frac{C_\Delta(|\lambda_1| + \varepsilon_1)^\tau}{\left[ C_\gamma \left( \frac{|\lambda_k|}{(1+\varepsilon_3|\lambda_k|)(|\lambda_{k+1}|+\varepsilon_2)} \right)^\omega - 1 \right]} \quad (26)$$

$$< \frac{2C_\Delta(|\lambda_1| + \varepsilon_1)^\tau}{C_\gamma \left( \frac{|\lambda_k|}{(1+\varepsilon_3|\lambda_k|)(|\lambda_{k+1}|+\varepsilon_2)} \right)^\omega} \quad (27)$$

$$< \delta, \quad (28)$$

939 where in (26) we apply Lemma G.4, while in (27) and (28) we require

$$\omega > \max \left\{ \frac{\log 2/C_\gamma}{\log(|\lambda_k|/(1+\varepsilon_3|\lambda_k|)(|\lambda_{k+1}|+\varepsilon_2))}, \frac{\log(2C_\Delta)/(C_\gamma\delta) + \tau \log(|\lambda_1|+\varepsilon_1)}{\log(|\lambda_k|/(1+\varepsilon_3|\lambda_k|)(|\lambda_{k+1}|+\varepsilon_2))} \right\}. \quad (29)$$

940 Finally, to bound the error of the whole matrix, we simply apply the definition

$$\begin{aligned} \|\hat{B}_\tau - B_\tau\| &= \max_{\|u\|=1} \|(\hat{B}_\tau - B_\tau)u\| \leq \max_{\|u\|=1} \sum_{i=1}^k |u_i| \|\hat{b}_i - b_i\| \\ &< \frac{\sqrt{k}}{\alpha} (\zeta_{\varepsilon_1}(A)^2(|\lambda_1|+\varepsilon_1)^{\tau-1}((2\tau+2)\|A\|+\|B\|)+1) \delta \\ &< \frac{2\sqrt{k}\zeta_{\varepsilon_1}(A)^2((2\tau+2)\|A\|+\|B\|)}{\alpha} (|\lambda_1|+\varepsilon_1)^{\tau-1} \delta. \end{aligned}$$

941 This completes the proof.  $\square$

942 **Corollary G.5.** *Under the premises of Theorem 4.1 and Lemma G.4, when (29), (30) and (31) hold,*

$$\sigma_{\min}(\hat{B}_\tau) > \frac{c\|B\|}{4\zeta_{\varepsilon_3}(N_1^{-1})} \left( \frac{|\lambda_k|}{1+\varepsilon_3|\lambda_k|} \right)^{\tau-1}.$$

943 *Proof.* We apply the  $E_u \oplus E_s$ -decomposition. Note that

$$B_\tau = P_1^\top A^{\tau-1} B = P_1^\top (Q_1 N_1^{\tau-1} R_1 + Q_2 N_2^{\tau-1} R_2) B = N_1^{\tau-1} R_1 B + P_1^\top Q_2 N_2^{\tau-1} R_2 B,$$

944 so by Gelfand's Formula and Lemma A.1 we have

$$\begin{aligned} \sigma_{\min}(B_\tau) &= \sigma_{\min}(N_1^{\tau-1} R_1 B + P_1^\top Q_2 N_2^{\tau-1} R_2 B) \\ &\geq \sigma_{\min}(N_1^{\tau-1}) \sigma_{\min}(R_1 B) - \|P_1^\top Q_2\| \|N_2^{\tau-1}\| \|R_2\| \|B\| \\ &\geq \frac{c\|B\|}{\zeta_{\varepsilon_3}(N_1^{-1})} \left( \frac{|\lambda_k|}{1+\varepsilon_3|\lambda_k|} \right)^{\tau-1} - \frac{\sqrt{2\xi}\zeta_{\varepsilon_2}(N_2)\|B\|}{1-\xi} (|\lambda_{k+1}|+\varepsilon_2)^{\tau-1} \\ &> \frac{c\|B\|}{2\zeta_{\varepsilon_3}(N_1^{-1})} \left( \frac{|\lambda_k|}{1+\varepsilon_3|\lambda_k|} \right)^{\tau-1} \end{aligned}$$

945 where the last inequality requires

$$\frac{\sqrt{2\xi}\zeta_{\varepsilon_2}(N_2)\zeta_{\varepsilon_3}(N_1^{-1})}{c(1-\xi)} \left( \frac{(|\lambda_{k+1}|+\varepsilon_2)(1+\varepsilon_3|\lambda_k|)}{|\lambda_k|} \right)^{\tau-1} < \frac{1}{2},$$

946 or equivalently,

$$\tau > \frac{\log \frac{c(1-\xi)}{2\sqrt{2\xi}\zeta_{\varepsilon_2}(N_2)\zeta_{\varepsilon_3}(N_1^{-1})}}{\log \frac{(|\lambda_{k+1}|+\varepsilon_2)(1+\varepsilon_3|\lambda_k|)}{|\lambda_k|}} + 1. \quad (30)$$

947 Therefore, using Proposition G.6,  $\sigma_{\min}(\hat{B}_\tau)$  is lower bounded by

$$\begin{aligned} \sigma_{\min}(\hat{B}_\tau) &\geq \sigma_{\min}(B_\tau) - \|\hat{B}_\tau - B_\tau\| \\ &> \frac{c\|B\|}{2\zeta_{\varepsilon_3}(N_1^{-1})} \left( \frac{|\lambda_k|}{1+\varepsilon_3|\lambda_k|} \right)^{\tau-1} - C_B (|\lambda_1|+\varepsilon_1)^{\tau-1} \delta \\ &> \frac{c\|B\|}{4\zeta_{\varepsilon_3}(N_1^{-1})} \left( \frac{|\lambda_k|}{1+\varepsilon_3|\lambda_k|} \right)^{\tau-1}, \end{aligned}$$

948 where the last inequality requires

$$\delta < \frac{c\|B\|}{4\zeta_{\varepsilon_3}(N_1^{-1})C_B} \left( \frac{|\lambda_k|}{(1+\varepsilon_3|\lambda_k|)(|\lambda_1|+\varepsilon_1)} \right)^{\tau-1}. \quad (31)$$

949 This completes the proof.  $\square$

950 Finally, using the above bounds, we can easily upper bound the norm of our controller  $\hat{K}_1$ .

951 **Proposition G.7.** *Under the premises of Theorem 4.1, when (29), (30), (31) and  $\delta < \frac{1}{\tau}$  hold,*

$$\|\hat{K}_1\| < C_K \left( \frac{(|\lambda_1| + \varepsilon_1)(1 + \varepsilon_3|\lambda_k|)}{|\lambda_k|} \right)^{\tau-1},$$

952 where  $C_K := \frac{4\zeta_{\varepsilon_3}(N_1^{-1})(\zeta_{\varepsilon_1}(M_1)(|\lambda_1| + \varepsilon_1) + 2\|A\|\zeta_{\varepsilon_1}(A))}{c\|B\|}$ .

953 *Proof.* Recall that the controller is constructed as  $\hat{K}_1 = \hat{B}_\tau^{-1} \hat{M}_1^\tau \hat{P}_1^\top$ , so we have

$$\|\hat{K}_1\| \leq \|\hat{B}_\tau^{-1}\| \|\hat{M}_1^\tau\| = \frac{\|\hat{M}_1^\tau\|}{\sigma_{\min}(\hat{B}_\tau)},$$

954 and the bound is merely a combination of Corollary G.2 and Corollary G.5 whenever  $\delta < \frac{1}{\tau}$ .  $\square$

#### 955 G.4 Proof of Theorem 4.1

956 Now we are ready to combine the above building blocks and present the complete proof of Theorem  
957 4.1. Note that, with all the bounds established above, the proof structure parallels that of Theorem  
958 4.2, the special case with a symmetric dynamical matrix  $A$ .

959 *Proof of Theorem 4.1.* The proof is again based on Lemma 5.3. We first guarantee that the diagonal  
960 blocks are stable. For the top-left block,

$$\begin{aligned} \|M_1^\tau + P_1^\top A^{\tau-1} B \hat{K}_1\| &= \|M_1^\tau - B_\tau \hat{B}_\tau^{-1} \hat{M}_1^\tau \hat{P}_1^\top P_1\| \\ &\leq \|M_1^\tau - \hat{M}_1^\tau\| + \|(B_\tau - \hat{B}_\tau) \hat{B}_\tau^{-1} \hat{M}_1^\tau\| + \|B_\tau \hat{B}_\tau^{-1} \hat{M}_1^\tau (I - \hat{P}_1^\top P_1)\| \\ &\leq \|M_1^\tau - \hat{M}_1^\tau\| + \|B_\tau - \hat{B}_\tau\| \|\hat{K}_1\| + \|B_\tau\| \|\hat{K}_1\| \|I - \hat{P}_1^\top P_1\| \\ &\leq 2\tau \|A\| \zeta_{\varepsilon_1}(A)^2 (|\lambda_1| + \varepsilon_1)^{\tau-1} \delta \\ &\quad + C_B C_K \left( \frac{(|\lambda_1| + \varepsilon_1)^2 (1 + \varepsilon_3 |\lambda_k|)}{|\lambda_k|} \right)^{\tau-1} \delta \end{aligned} \quad (32)$$

$$\begin{aligned} &\quad + \zeta_{\varepsilon_1}(A) \|B\| C_K \left( \frac{(|\lambda_1| + \varepsilon_1)^2 (1 + \varepsilon_3 |\lambda_k|)}{|\lambda_k|} \right)^{\tau-1} \delta \\ &< (C_B C_K + \zeta_{\varepsilon_1}(A) \|B\| C_K + 1) \left( \frac{(|\lambda_1| + \varepsilon_1)^2 (1 + \varepsilon_3 |\lambda_k|)}{|\lambda_k|} \right)^{\tau-1} \delta \end{aligned} \quad (33)$$

$$< \frac{1}{2}, \quad (34)$$

961 where in (32) we apply Propositions G.2, G.6, G.7, and E.1; in (33) we require

$$\frac{1}{\tau} \left( \frac{(|\lambda_1| + \varepsilon_1)^2 (1 + \varepsilon_3 |\lambda_k|)}{|\lambda_k|} \right)^{\tau-1} > 2 \|A\| \zeta_{\varepsilon_1}(A)^2; \quad (35)$$

962 and in (34) we require

$$\delta < \frac{1}{2(C_B C_K + \zeta_{\varepsilon_1}(A) \|B\| C_K + 1)} \left( \frac{(|\lambda_1| + \varepsilon_1)^2 (1 + \varepsilon_3 |\lambda_k|)}{|\lambda_k|} \right)^{-(\tau-1)}. \quad (36)$$

963 For the bottom-right block, it is straight-forward to see that

$$\begin{aligned} \|M_2^\tau + P_2^\top A^{\tau-1} B \hat{K}_1 \hat{P}_1^\top P_2\| &\leq \|M_2^\tau\| + \|P_2^\top A^{\tau-1}\| \|B\| \|\hat{K}_1\| \|\hat{P}_1^\top P_2\| \\ &\leq \zeta_{\varepsilon_2}(M_2) (|\lambda_{k+1}| + \varepsilon_2)^\tau \\ &\quad + \zeta_{\varepsilon_2}(M_2) \|B\| C_K \left( \frac{(|\lambda_1| + \varepsilon_1)(|\lambda_{k+1}| + \varepsilon_2)(1 + \varepsilon_3 |\lambda_k|)}{|\lambda_k|} \right)^{\tau-1} \delta \\ &< 1 \end{aligned}$$

964 where the last inequality requires

$$\tau > \frac{\log 1/(4\zeta_{\varepsilon_2}(M_2))}{\log(|\lambda_{k+1}| + \varepsilon_2)}, \quad (37)$$

$$\delta < \frac{1}{4\zeta_{\varepsilon_2}(M_2)\|B\|C_K} \left( \frac{(|\lambda_1| + \varepsilon_1)(|\lambda_{k+1}| + \varepsilon_2)(1 + \varepsilon_3|\lambda_k|)}{|\lambda_k|} \right)^{-(\tau-1)}. \quad (38)$$

965 Now it only suffices to bound the spectral norms of off-diagonal blocks. Note that, by applying  
966 Proposition G.7 and Proposition G.1, the top-right block is bounded as

$$\begin{aligned} \|\Delta_\tau + P_1^\top A^{\tau-1} B \hat{K}_1 \hat{P}_1^\top P_2\| &\leq \|\Delta_\tau\| + \|B_\tau\| \|\hat{K}_1\| \|\hat{P}_1^\top P_2\| \\ &< C_\Delta (|\lambda_1| + \varepsilon_1)^\tau \\ &\quad + \zeta_{\varepsilon_1}(A) \|B\| C_K \left( \frac{(|\lambda_1| + \varepsilon_1)^2 (1 + \varepsilon_3|\lambda_k|)}{|\lambda_k|} \right)^{\tau-1} \delta \\ &< (C_\Delta + 1) (|\lambda_1| + \varepsilon_1)^\tau \end{aligned}$$

967 where the last inequality requires

$$\delta < \frac{(|\lambda_1| + \varepsilon_1)^2}{\zeta_{\varepsilon_1}(A) \|B\| C_K} \left( \frac{(|\lambda_1| + \varepsilon_1)^2 (1 + \varepsilon_3|\lambda_k|)}{|\lambda_k|} \right)^{-\tau}; \quad (39)$$

968 and the bottom-left block is bounded as

$$\begin{aligned} \|P_2^\top A^{\tau-1} B \hat{K}_1 \hat{P}_1^\top P_1\| &\leq \|P_2^\top A^{\tau-1}\| \|B\| \|\hat{K}_1\| \\ &< \zeta_{\varepsilon_2}(M_2) \|B\| C_K \left( \frac{(|\lambda_1| + \varepsilon_1)(|\lambda_{k+1}| + \varepsilon_2)(1 + \varepsilon_3|\lambda_k|)}{|\lambda_k|} \right)^{\tau-1}. \end{aligned}$$

969 Now, by Lemma 5.3, we can guarantee that

$$\rho(\hat{L}_\tau) \leq \frac{1}{2} + \chi(\hat{L}_\tau) \frac{(C_\Delta + 1) \zeta_{\varepsilon_2}(M_2) \|B\| C_K}{|\lambda_1| + \varepsilon_1} \left( \frac{(|\lambda_1| + \varepsilon_1)^2 (|\lambda_{k+1}| + \varepsilon_2)(1 + \varepsilon_3|\lambda_k|)}{|\lambda_k|} \right)^{\tau-1} < 1,$$

970 which requires

$$\tau > \frac{\log \frac{2(|\lambda_1| + \varepsilon_1)}{\chi(\hat{L}_\tau)(C_\Delta + 1) \zeta_{\varepsilon_2}(M_2) \|B\| C_K}}{\log \frac{(|\lambda_1| + \varepsilon_1)^2 (|\lambda_{k+1}| + \varepsilon_2)(1 + \varepsilon_3|\lambda_k|)}{|\lambda_k|}}. \quad (40)$$

971 Note that the above constraint makes sense only if  $|\lambda_1|^2 |\lambda_{k+1}| < |\lambda_k|$ .

972 So far, it is still left to recollect all the constraints we need on the parameters  $\tau, \alpha, \delta, \gamma$  and  $\omega$ . To  
973 start with, all constraints on  $\tau$  (see (30), (35), (37) and (40)) can be summarized as

$$\begin{aligned} \tau > \max \left\{ \frac{\log \frac{c(1-\xi)}{2\sqrt{2\xi}\zeta_{\varepsilon_2}(N_2)\zeta_{\varepsilon_3}(N_1^{-1})}}{\log \frac{(|\lambda_{k+1}| + \varepsilon_2)(1 + \varepsilon_3|\lambda_k|)}{|\lambda_k|}} + 1, \frac{\log 1/(4\zeta_{\varepsilon_2}(M_2))}{\log(|\lambda_{k+1}| + \varepsilon_2)}, \frac{\log \frac{2(|\lambda_1| + \varepsilon_1)}{\chi(\hat{L}_\tau)(C_\Delta + 1) \zeta_{\varepsilon_2}(M_2) \|B\| C_K}}{\log \frac{(|\lambda_1| + \varepsilon_1)^2 (|\lambda_{k+1}| + \varepsilon_2)(1 + \varepsilon_3|\lambda_k|)}{|\lambda_k|}}, \right. \\ \left. - \frac{1}{\log \frac{(|\lambda_1| + \varepsilon_1)^2 (1 + \varepsilon_3|\lambda_k|)}{|\lambda_k|}} W_{-1} \left( - \frac{\log \frac{(|\lambda_1| + \varepsilon_1)^2 (1 + \varepsilon_3|\lambda_k|)}{|\lambda_k|}}{2\|A\| \zeta_{\varepsilon_1}(A)^2 \frac{(|\lambda_1| + \varepsilon_1)^2 (1 + \varepsilon_3|\lambda_k|)}{|\lambda_k|}} \right) \right\}, \end{aligned}$$

974 where  $W_{-1}$  denotes the non-principle branch of the Lambert-W function. Here we utilize the fact  
975 that, for  $x > \frac{1}{\log a}$ ,  $y = \frac{a^x}{x}$  is monotone increasing with inverse function  $x = -\frac{1}{\log a} W_{-1} \left( -\frac{\log a}{y} \right)$ ,  
976 which can be upper bounded by Theorem 1 in [57] as

$$-\frac{1}{\log a} W_{-1} \left( -\frac{\log a}{y} \right) < \frac{\log y - \log \log a + \sqrt{2(\log y - \log \log a)}}{\log a} < \frac{3(\log y - \log \log a)}{\log a}.$$

977 By gathering different constants, we have

$$\tau > \frac{\log \frac{\sqrt{\xi}}{1-\xi} + \log \frac{1}{c} + \log \chi(\hat{L}_\tau) + 5 \log \bar{\zeta} + \log \frac{\|A\|}{|\lambda_1| - |\lambda_{k+1}|} + C_\tau}{\log \frac{|\lambda_k|}{|\lambda_1|^2 |\lambda_{k+1}|}} = O(1), \quad (41)$$

978 where we define  $\bar{\zeta} := \max\{\zeta_{\varepsilon_1}(A), \zeta_{\varepsilon_2}(M_2), \zeta_{\varepsilon_2}(N_2), \zeta_{\varepsilon_3}(N_1^{-1})\}$ , and  $C_\tau$  is a numerical constant.  
 979 Note that we have to guarantee the denominator to be positive, which gives rise to the additional  
 980 assumption  $|\lambda_1|^2|\lambda_{k+1}| < |\lambda_k|$ . Meanwhile, for any  $\ell \in \mathbb{N}$ , we shall select  $\gamma$  such that

$$\gamma = O(k^{-\ell}), \quad \gamma < \min \left\{ \frac{1}{2}, \frac{1}{\sqrt{2/(\sigma_{\min}(R_1)k)} + 1} \right\}, \quad (42)$$

981 and select  $\alpha$  such that (see (23), and we have already guaranteed  $\gamma_\omega > 2$  in (29))

$$\alpha < \frac{\frac{2}{3}\sigma_{\min}(M_1) - \frac{\gamma}{1-\xi}\|A\|}{(1 + \frac{\sqrt{2\xi}}{1-\xi} + \frac{\gamma}{1-\xi})\|B\|} = O(1). \quad (43)$$

982 Now constraints on  $\delta$  (see (31), (36), (38) and (39)) can be summarized as

$$\begin{aligned} \delta < \min \left\{ \frac{c\|B\|}{4\zeta_{\varepsilon_3}(N_1^{-1})C_B} \left( \frac{|\lambda_k|}{(1 + \varepsilon_3|\lambda_k|)(|\lambda_1| + \varepsilon_1)} \right)^{\tau-1}, \right. \\ & \quad \frac{1}{2(C_B C_K + \zeta_{\varepsilon_1}(A)\|B\|C_K + 1)} \left( \frac{(|\lambda_1| + \varepsilon_1)^2(1 + \varepsilon_3|\lambda_k|)}{|\lambda_k|} \right)^{-(\tau-1)}, \\ & \quad \frac{1}{4\zeta_{\varepsilon_2}(M_2)\|B\|C_K} \left( \frac{(|\lambda_1| + \varepsilon_1)(|\lambda_{k+1}| + \varepsilon_2)(1 + \varepsilon_3|\lambda_k|)}{|\lambda_k|} \right)^{-(\tau-1)}, \\ & \quad \left. \frac{(|\lambda_1| + \varepsilon_1)^2}{\zeta_{\varepsilon_1}(A)\|B\|C_K} \left( \frac{(|\lambda_1| + \varepsilon_1)^2(1 + \varepsilon_3|\lambda_k|)}{|\lambda_k|} \right)^{-\tau} \right\}, \end{aligned}$$

983 which can be simplified to ( $C_\delta$  is a constant collecting minor factors)

$$\delta < \frac{C_\delta \alpha c}{\sqrt{k}\bar{\zeta}^3(\|A\| + \|B\|)} |\lambda_1|^{-2\tau} = O(k^{-1/2}|\lambda_1|^{-2\tau}), \quad (44)$$

984 or we can rewrite the bound equivalently in terms of  $t_0$  (recall (10) in Appendix E) as

$$\begin{aligned} t_0 &> \frac{\log(n^2 \binom{n}{k}) + \log k + \log \kappa_d(A) + 2\tau \log |\lambda_1| + 3 \log \bar{\zeta} + \log(\|A\| + \|B\|) + \log \frac{\sqrt{2}}{C_\delta \alpha}}{2 \log \frac{|\lambda_k|}{|\lambda_{k+1}|}} \\ &= O \left( \frac{2\tau \log |\lambda_1| + k \log n + \log \kappa_d(A)}{\log \frac{|\lambda_k|}{|\lambda_{k+1}|}} \right), \end{aligned} \quad (45)$$

985 Finally, we select  $\omega$  such that (see (29), and note that  $C_\gamma = O(\gamma) = O(k^{-\ell})$ )

$$\omega > \max \left\{ \frac{\log \frac{2}{C_\gamma}}{\log \frac{|\lambda_k|}{(1 + \varepsilon_3|\lambda_k|)(|\lambda_{k+1}| + \varepsilon_2)}}, \frac{\log \frac{2C_A}{C_\gamma \delta} + \tau \log(|\lambda_1| + \varepsilon_1)}{\log \frac{|\lambda_k|}{(1 + \varepsilon_3|\lambda_k|)(|\lambda_{k+1}| + \varepsilon_2)}} \right\},$$

986 which can be reorganized as

$$\omega > \frac{\log \frac{1}{C_\gamma} + \log \frac{\sqrt{\xi}}{1-\xi} + 2 \log \bar{\zeta} + \log \frac{\|A\|}{|\lambda_1| - |\lambda_{k+1}|} + \log \frac{1}{\delta} + C_\omega}{\log \frac{|\lambda_k|}{|\lambda_{k+1}|}} = O(\ell \log k). \quad (46)$$

987 Note that here  $\varepsilon_1, \varepsilon_2, \varepsilon_3$  are taken to be small enough, so that

$$|\lambda_{k+1}| + \varepsilon_2 < 1, \quad |\lambda_1| + \varepsilon_1)^2(|\lambda_{k+1}| + \varepsilon_2) < \frac{|\lambda_k|}{1 + \varepsilon_3|\lambda_k|}, \quad \varepsilon_3|\lambda_k| < 1. \quad (47)$$

988 Also, the probability of sampling an admissible  $x_0$  is  $1 - \theta(\gamma) = 1 - O(k^{-\ell})$  by the union bound.

989 Finally, by (41), (45) and (46), we conclude that Algorithm 1 terminates within

$$t_0 + k(1 + \omega + \tau) > \frac{1}{2 \log \frac{|\lambda_k|}{|\lambda_{k+1}|}} \left( \underbrace{\log(n^2 \binom{n}{k})}_{O(k \log n)} + \underbrace{2k \log \frac{1}{C_\gamma} + \log k}_{O(k \log k)} \right) + k$$

$$\begin{aligned}
& + \frac{\log \kappa_d(A) + 2\tau \log |\lambda_1| + 3 \log \bar{\zeta} + \log(\|A\| + \|B\|) + \log \frac{\sqrt{2}}{C_\delta \alpha}}{2 \log \frac{|\lambda_k|}{|\lambda_{k+1}|}} \\
& + \frac{k \left( \log \frac{\sqrt{\xi}}{1-\xi} + 2 \log \bar{\zeta} + \log \frac{\|A\|}{|\lambda_1| - |\lambda_{k+1}|} + \log \frac{1}{\delta} + C_\omega \right)}{\log \frac{|\lambda_k|}{|\lambda_{k+1}|}} \\
& + \frac{k \left( \log \frac{\sqrt{\xi}}{1-\xi} + \log \frac{1}{c} + \log \chi(\hat{L}_\tau) + 5 \log \bar{\zeta} + \log \frac{\|A\|}{|\lambda_1| - |\lambda_{k+1}|} + C_\tau \right)}{\log \frac{|\lambda_k|}{|\lambda_1|^2 |\lambda_{k+1}|}} \\
& = O(k \log n),
\end{aligned}$$

time steps, which completes the proof.  $\square$

For the convenience of readers, we provide a table summarizing all constants appearing in the bound.

Table 1: Lists of parameters and constants appearing in the bound.

| (a) Algorithmic parameters (introduced in Algorithm algorithm 1). |                  |                                                                                                                                                                                                  |
|-------------------------------------------------------------------|------------------|--------------------------------------------------------------------------------------------------------------------------------------------------------------------------------------------------|
| Constant                                                          | Appearance       | Explanation                                                                                                                                                                                      |
| $t_0$                                                             | Stage 1          | $t_0$ initialization steps to separate unstable components                                                                                                                                       |
| $\omega$                                                          | Stage 3          | $\omega$ heat-up steps in each iteration of learning $B_\tau$                                                                                                                                    |
| $\alpha$                                                          | Stage 3          | $\ u_{t_i}\  = \alpha \ x_{t_i}\ $ to keep non-negligible unstable component                                                                                                                     |
| $\tau$                                                            | Stage 4          | $\tau$ steps between consecutive control inputs are injected                                                                                                                                     |
| (b) System parameters (as functions of dynamical matrices).       |                  |                                                                                                                                                                                                  |
| Constant                                                          | Definition       | Explanation                                                                                                                                                                                      |
| $\lambda_i$                                                       | Assumption 4.1   | (complex) eigenvalue of $A$ with $i^{\text{th}}$ largest modulus                                                                                                                                 |
| $\ A\ , \ B\ $                                                    | Notation         | 2-norm of dynamical matrices $A$ and $B$                                                                                                                                                         |
| $c$                                                               | Assumption 4.3   | $c$ effective controllability over the unstable subspace $E_u$ , i.e., $\sigma_{\min}(R_1 B) > c \ B\ $                                                                                          |
| $\xi$                                                             | Definition 3.1   | $E_u^\perp$ and $E_s$ are $\xi$ -close subspaces, i.e., $\sigma_{\min}(P_2^\top Q_2) > 1 - \xi$                                                                                                  |
| $\chi(\cdot)$                                                     | Lemma D.1        | perturbation constant for 2-by-2 block diagonal matrices                                                                                                                                         |
| $\zeta_\varepsilon(\cdot)$                                        | Lemma G.1        | Gelfand constant for the norm of matrix exponents                                                                                                                                                |
| $\kappa_d(\cdot)$                                                 | Notation         | the diagonalization condition number, i.e., condition number of the matrix formed by eigenvectors as columns                                                                                     |
| (c) Shorthand notations (introduced in proofs).                   |                  |                                                                                                                                                                                                  |
| Constant                                                          | Definition       | Explanation                                                                                                                                                                                      |
| $C_\Delta$                                                        | Proposition G.1  | $C_\Delta := \zeta_{\varepsilon_1}(M_1) \zeta_{\varepsilon_2}(M_2) \frac{(2-\xi)\sqrt{2\xi}\ A\ }{1-\xi} \frac{2 \lambda_{k+1} }{ \lambda_1  + \varepsilon_1 -  \lambda_{k+1}  - \varepsilon_2}$ |
| $C_\gamma$                                                        | Proposition G.3  | $C_\gamma := \frac{1}{(1+\frac{1}{\gamma})\zeta_{\varepsilon_3}(N_1^{-1})\zeta_{\varepsilon_2}(N_2)\ R_2\ }$ ( $\gamma$ is taken according to (42))                                              |
| $C_B$                                                             | Proposition G.6  | $C_B := \frac{2\sqrt{k}\zeta_{\varepsilon_1}(A)^2 \left( (2\tau+2)\ A\  + \ B\  \right)}{\alpha}$                                                                                                |
| $C_K$                                                             | Proposition G.7  | $C_K := \frac{4\zeta_{\varepsilon_3}(N_1^{-1}) \left( \zeta_{\varepsilon_1}(M_1)( \lambda_1  + \varepsilon_1) + 2\ A\ \zeta_{\varepsilon_1}(A) \right)}{c\ B\ }$                                 |
| $\zeta$                                                           | below (41)       | $\zeta := \max\{\zeta_{\varepsilon_1}(A), \zeta_{\varepsilon_2}(M_2), \zeta_{\varepsilon_2}(N_2), \zeta_{\varepsilon_3}(N_1^{-1})\}$                                                             |
| $C_\tau, C_\delta, C_\omega$                                      | (41), (44), (46) | collection of numerical constants in (41), (44), (46)                                                                                                                                            |

## H An Illustrative Example with Additive Noise

Finally, we include an illustrative experiment that shows the performance of our LTS<sub>0</sub> algorithm.

**Settings.** We evaluate the algorithm in LTI systems with additive noise

$$x_{t+1} = Ax_t + Bu_t + w_t, \quad \text{where } w_t \stackrel{\text{i.i.d.}}{\sim} \mathcal{N}(0, \sigma_w^2 I).$$

Here  $\sigma_w$  characterizes the variance (and thus the magnitude) of the noise. The dynamical matrices are randomly generated:  $A$  is generated based on its eigen-decomposition  $A = V\Lambda V^{-1}$ , where the

997 eigenvalues  $\Lambda = \text{diag}(\lambda_1, \dots, \lambda_n)$  are randomly generated by selecting  $\lambda_{1:k} \sim \mathcal{U}(1, \lambda_{\max})$  and  
 998  $\lambda_{k+1:n} \sim \frac{|\lambda_k|}{|\lambda_1|^2} \cdot \mathcal{U}(-1, 1)$  (to ensure  $|\lambda_1|^2 |\lambda_{k+1}| < |\lambda_k|$ ), and the eigenvectors  $V = [v_1, \dots, v_n]$   
 999 are generated by random perturbation to a random orthogonal matrix (to avoid tiny  $\xi$ ); meanwhile,  $B$   
 1000 is generated by random sampling i.i.d. entries from  $\mathcal{U}(0, 1)$ . For comparability and reproducibility,  
 1001 throughout the experiment we set  $k = 3$  and use 0 as the initial random seed.

1002 To compare the performance in different settings, 30 data points are collected for each pair of  $\sigma_w$   
 1003 and  $n$ . It is observed that our algorithm might cause numerical instability issues (e.g.,  $\text{cond}(D^\top D)$   
 1004 could be large), so we simply ignore such cases and repeat until 30 data points are collected. The  
 1005 parameters of the algorithm are determined in an adaptive way that minimizes the number of running  
 1006 steps: we search for the minimum  $t_0$  that yields estimation error smaller than  $\delta$ , search for the  
 1007 minimum  $\tau$  such that  $K = B_\tau^{-1} M_1^\top P_1^\top$  stabilizes the system, and the  $\omega$  heat-up steps in Stage 3  
 1008 could be ended earlier if we already observe  $\|\hat{P}_1^\top x\|/\|x\|$  larger than a certain threshold.

1009 Our experimental results are presented in Figure 1 below.

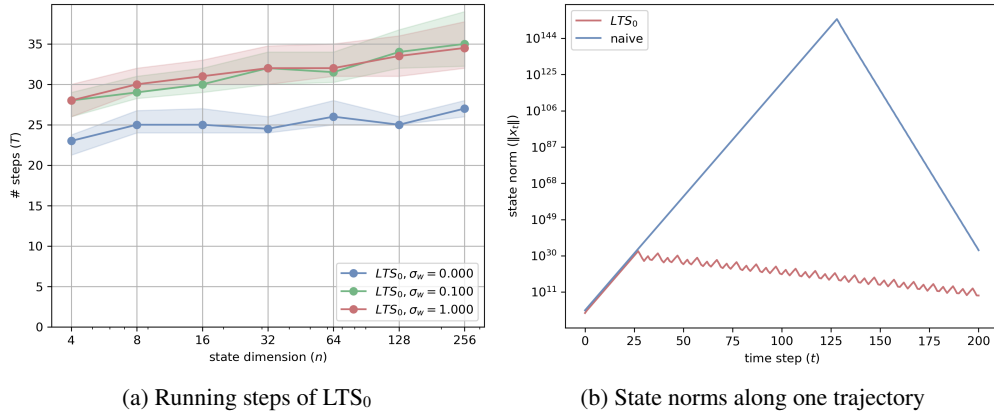

Figure 1: Experimental results. In (a) the line shows the median of running steps, and the shadow marks the range between upper and lower quartiles (the horizontal axis is in log scale). In (b) the trajectories of our algorithm and the naive approach are compared in a randomly-generated system with  $n = 128$  and  $\sigma_w = 0$  (the vertical axis is in log scale).

1010 **Performance under different  $n$  and  $\sigma_w$ .** Figure 1a shows the number of running steps of  $\text{LTS}_0$   
 1011 that is needed to learn a stabilizing controller. It is evident that the number of running steps grow  
 1012 almost linearly with regard to  $\log n$ , which is in accordance with Theorem 4.1.

1013 As for the effect of noise, it is observed that the algorithm needs more steps in systems with noise  
 1014 than in those without noise; nevertheless, the magnitude of noise does not have much influence on  
 1015 the number of running steps. This is also reasonable since the increase is mainly attributed to  $t_0$  —  
 1016 it takes more initial steps to push the state close enough to  $E_u$ , such that the estimation error of  $P_1$   
 1017 drops to acceptable level; however, as the  $E_u$ -component grows exponentially fast over time while  
 1018  $w_t$  is i.i.d., the magnitude of noise only plays a minor role in the increase. Noise becomes negligible  
 1019 in later stages due to the disproportionate magnitudes of states and noise.

1020 **Analysis of comparison of trajectories.** In Figure 1b we study an exemplary trajectory of our  $\text{LTS}_0$   
 1021 algorithm, and compare it against that of the naive approach, which first identifies the system and  
 1022 then designs a controller to nullify the unstable eigenvalues by standard pole-placement method.  
 1023 It is evident that our algorithm needs significantly fewer steps, and thus induces far smaller state  
 1024 norms, to learn a controller that effectively stabilizes the system. It is also observed that our con-  
 1025 troller decreases state norm in a zig-zag manner, which is due to the  $\tau$ -hop design our algorithm  
 1026 adopts. Nevertheless, a potential drawback of our controller design is that the spectral radius of the  
 1027 controlled system is larger (since we cannot precisely nullify all unstable eigenvalues), resulting in  
 1028 a slower stabilizing rate than the naive approach (compare the decreasing parts of the curves).
