# Supplementary material
Source: ML conference proceedings conference paper supplement (https://openreview.net/forum?id=A7O7Fl5Qo9W)
Supplement: supplementary_material [file attachment]

---

# On the Sample Complexity of Stabilizing LTI Systems on a Single Trajectory

---

Anonymous Author(s)

Affiliation

Address

email

## Abstract

1 Stabilizing an unknown dynamical system is one of the central problems in control theory. In this paper, we study the sample complexity of the learn-to-stabilize problem in Linear Time-Invariant (LTI) systems on a single trajectory. Current state-of-the-art approaches require a sample complexity linear in  $n$ , the state dimension, which incurs a state norm that blows up exponentially in  $n$ . We propose a novel algorithm based on spectral decomposition that only needs to learn “a small part” of the dynamical matrix acting on its unstable subspace. We show that, under proper assumptions, our algorithm stabilizes an LTI system on a single trajectory with  $\tilde{O}(k)$  samples, where  $k$  is the instability index of the system. This represents the first sub-linear sample complexity result for the stabilization of LTI systems under the regime when  $k = o(n)$ .

## 12 1 Introduction

13 Linear Time-Invariant (LTI) systems, namely  $x_{t+1} = Ax_t + Bu_t$ , where  $x_t \in \mathbb{R}^n$  is the state and  $u_t \in \mathbb{R}^m$  is the control input, are one of the most fundamental dynamical systems in control theory, and have wide applications across engineering, economics and societal domains. For systems with known dynamical matrices  $(A, B)$ , there is a well-developed theory for designing feedback controllers with guaranteed stability, robustness, and performance [1, 2]. However, these tools cannot be directly applied when  $(A, B)$  is unknown.

19 Driven by the success of machine learning [3, 4], there has been significant interest in learning-based (adaptive) control, where the learner does not know the underlying system dynamics and learns to control the system in an online manner, usually with the goal of achieving low regret [5–13].

22 Despite the progress, an important limitation in this line of work is a common assumption that the learner has a priori access to a known *stabilizing* controller. This assumption simplifies the learning task, since it ensures a bounded state trajectory in the learning stage, and thus enables the learner to learn with low regret. However, assuming a known stabilizing controller is not practical, as *stabilization* itself is nontrivial and considered equally important as any other performance guarantee.

27 To overcome this limitation, in this paper we consider the *learn-to-stabilize* problem, i.e., learning to stabilize an unknown dynamical system without prior knowledge of any stabilizing controller. Understanding the learn-to-stabilize problem is of great importance to the learning-based control literature, as it serves as a precursor to any learning-based control algorithms that assume knowledge of a stabilizing controller.

32 The learn-to-stabilize problem has attracted extensive attention recently. For example, [14] and [15] adopt a model-based approach that first excites the open-loop system to learn dynamical matrices  $(A, B)$ , and then designs a stabilizing controller, with a sample complexity scaling linearly in  $n$ , the state dimension. However, a linearly-scaling sample complexity could be unsatisfactory for some

specific instances, since the state trajectory still blows up exponentially when the open-loop system is unstable, incurring a  $2^{\tilde{\Theta}(n)}$  state norm, and hence a  $2^{\tilde{\Theta}(n)}$  regret (in LQR settings, for example). Another recent work [16] proposes a policy-gradient-based discount annealing method that solves a series of discounted LQR problems with increasing discount factors, and shows that the control policy converges to a near-optimal policy. However, this model-free approach only guarantees a  $\text{poly}(n)$  sample complexity. In fact, to the best of our knowledge, state-of-the-art learn-to-stabilize algorithms with theoretical guarantees always incur state norms exponential in  $n$ .

It has been shown in [15] that all *general-purpose* control algorithms are doomed to suffer a *worst-case* regret of  $2^{\Omega(n)}$ . This result is intuitive, since from an information-theoretic perspective, a complete recovery of  $A$  should take  $\Theta(n)$  samples since  $A$  itself involves  $n^2$  parameters. However, this does not rule out the possibility that we can achieve better regret in *specific* systems. Our work is motivated by the observation that it is not always necessary to learn the whole matrix  $A$  to stabilize an LTI system. For example, if the system is open-loop stable, we do not need to learn anything to stabilize it. For general LTI systems, it is still intuitive that open-loop *stable* “modes” exist and need not be learned for the learn-to-stabilize problem. So, we focus on learning a controller that stabilizes only the *unstable* “modes”, making it possible to learn a stabilizing controller without exponentially exploding state norms. The central question of this paper is:

*Can we exploit instance-specific properties of an LTI system to learn to stabilize it on a single trajectory, without incurring a state norm exponentially large in  $n$ ?*

**Contribution.** In this paper, we answer the above question by designing an algorithm that stabilizes an LTI system with only  $\tilde{O}(k)$  state samples along a single trajectory, where  $k$  is the *instability index* of the open-loop system and is defined as the number of unstable “modes” (i.e., eigenvalues with moduli larger than 1) of matrix  $A$ . Our result is significant in the sense that  $k$  can be considerably smaller than  $n$  for practical systems and, in such cases, our algorithm stabilizes the system using asymptotically fewer samples than prior work; specifically, it only incurs a state norm (and regret) in the order of  $2^{\tilde{O}(k)}$ , which is much smaller than  $2^{O(n)}$  of prior state of the art when  $k \ll n$ .

To formalize the concept of unstable “modes” for the presentation of our algorithm and analysis, we formulate a novel framework based on the spectral decomposition of dynamical matrix  $A$ . More specifically, we focus on the *unstable subspace*  $E_u$  spanned by the eigenvectors corresponding to unstable eigenvalues, and consider the system dynamics “restricted” to it — states are orthogonally projected onto  $E_u$ , and we only have to learn the effective part of  $A$  within subspace  $E_u$ , which takes only  $O(k)$  samples. The formulation is explained in detail in Section 3.1 and Appendix A. We comment that this idea of decomposition is in stark contrast to prior work, which in one way or another seeks to learn the entire  $A$  (or other similar quantities).

**Related work.** Our work contributes to and builds upon related works described below.

*Learning for control assuming known stabilizing controllers.* There has been a large literature on learning-based control with known stabilizing controllers. For example, one line of research utilizes model-free policy optimization approaches to learn the optimal controller for LTI systems [5–7, 17–30]. All of these works require a known stabilizing controller as an initializer for the policy search method. Another line of research uses model-based methods, i.e., learning dynamical matrices  $(A, B)$  first before designing a controller, which also require a known stabilizing controller (e.g., [31–39]). Compared to these works, we focus on the learn-to-stabilize problem without knowledge of an initial stabilizing controller, which can serve as a precursor to existing learning-for-control works that require a known stabilizing controller.

*Learning to stabilize on a single trajectory.* Stabilizing linear systems over *infinite* horizons with asymptotic convergence guarantees is a classical problem that has been studied extensively in a wide range of papers such as [40–42]. On the other hand, the problem of system stabilization over *finite* horizons remains partially open and has not seen significant progresses. Algorithms incurring a  $2^{O(n)}O(\sqrt{T})$  regret have been proposed in settings that rely on relatively strong assumptions of controllability and strictly stable transition matrices [13, 43], which has recently been improved to  $2^{\tilde{O}(n)} + \tilde{O}(\text{poly}(n)\sqrt{T})$  [14, 15]. Another model-based approach that merely assumes stabilizability is introduced in [44], though it does not provide guarantees on regret or sample complexity. A more recent model-free approach based on policy gradient [16] provides a novel perspective into this problem, yet it can only guarantee a sample complexity that is polynomial in  $n$ . Compared to these previous works, our approach requires only  $\tilde{O}(k)$  samples, incurring a sub-exponential state norm.

91 *Learning to stabilize on multiple trajectories.* There are also works [12, 45] that do not assume  
 92 known stabilizing controllers and learn the full dynamics before designing an optimal stabilizing  
 93 controller. While requiring  $\tilde{O}(n)$  samples which is larger than  $\tilde{O}(k)$  of our work, those approaches  
 94 do not have the exponentially large state norm issue as they allow *multiple trajectories*; i.e., the state  
 95 can be “reset” to 0 so that it won’t get too large. In contrast, we focus on the more challenging  
 96 single-trajectory scenario where the state cannot be reset.

97 *System Identification.* Our work is also related to the system identification literature, which focuses  
 98 on learning the system parameters of dynamical systems, with early works like [46] focusing on  
 99 asymptotic guarantees, and more recent works such as [47–52] focusing on finite-time guarantees.  
 100 Our approach also identifies the system (partially) before constructing a stabilizing controller, but  
 101 we only identify a part of  $A$  rather than the entire  $A$ .

## 102 2 Problem Formulation

103 We consider a noiseless LTI system  $x_{t+1} = Ax_t + Bu_t$ , where  $x_t \in \mathbb{R}^n$  and  $u_t \in \mathbb{R}^m$  are the *state*  
 104 and *control input* at time step  $t$ , respectively. The dynamical matrices  $A \in \mathbb{R}^{n \times n}$  and  $B \in \mathbb{R}^{n \times m}$   
 105 are unknown to the learner. The learner is allowed to learn about the system by interacting with it  
 106 on a *single trajectory* — the initial state is sampled uniformly at random from the unit hyper-sphere  
 107 surface in  $\mathbb{R}^n$ , and then, at each time step  $t$ , the learner is allowed to observe  $x_t$  and freely determine  
 108  $u_t$ . The goal of the learner is to learn a stabilizing controller, which is defined as follows.

109 **Definition 2.1** (Stabilizing Controller). *Control rule  $u_t = f_t(x_t, x_{t-1}, \dots, x_0)$  is called a **stabiliz-***  
 110 *ing controller if and only if the closed-loop system  $x_{t+1} = Ax_t + Bu_t$  is asymptotically stable; i.e.,*  
 111 *for any  $x_0 \in \mathbb{R}^n$ ,  $\lim_{t \rightarrow \infty} \|x_t\| = 0$  is guaranteed in the closed-loop system.*

112 To achieve this goal, a simple strategy is to let the system run in open loop to learn  $(A, B)$  via least  
 113 squares, and then design a stabilizing controller based on the learned dynamical matrices. However,  
 114 as has been discussed in the introduction, such a simple strategy inevitably induces an exponentially  
 115 large stage norm that is potentially improvable.<sup>1</sup> A possible remedy for this is to learn “a small part”  
 116 of  $(A, B)$  that is crucial for stabilization. Driven by such intuition, the core problem of this paper is  
 117 to characterize what is the “small part” and design an algorithm to learn it.

118 Note that, although it is common to include an additive disturbance term  $w_t$  in the LTI dynamics,  
 119 the introduction of stochasticity does not provide additional insights into our decomposition-based  
 120 algorithm, but rather, merely makes the analysis more technically challenging. Therefore, here we  
 121 simply omit the noise in theoretical results for the clarity of exposition, and will show by numerical  
 122 experiments that our algorithm can also handle disturbances (see Appendix H).

123 **Notation.** For  $z \in \mathbb{C}$ ,  $|z|$  is the modulus of  $z$ . For a matrix  $A \in \mathbb{R}^{p \times q}$ ,  $A^\top$  denotes the transpose of  
 124  $A$ ;  $\|A\|$  is the induced 2-norm of  $A$  (equal to its largest singular value), and  $\sigma_{\min}(A)$  is the smallest  
 125 singular value of  $A$ ; when  $A$  is square,  $\rho(A)$  denotes the spectral radius of  $A$ , and  $\kappa_d(A)$  denotes  
 126 the condition number of the matrix consisting of  $A$ ’s eigenvectors as columns. The space spanned  
 127 by  $\{v_1, \dots, v_p\}$  is denoted by  $\text{span}(v_1, \dots, v_p)$ , and the column space of  $A$  is denoted by  $\text{col}(A)$ .  
 128 For two subspaces  $U, V$  of  $\mathbb{R}^n$ ,  $U^\perp$  is the orthogonal complement of  $U$ , and  $U \oplus V$  is the direct sum  
 129 of  $U$  and  $V$ . The zero matrix and identity matrix are denoted by  $\mathbf{0}$ ,  $I$ , respectively.

## 130 3 Learning to Stabilize from Zero (LTS<sub>0</sub>)

131 The core of this paper is a novel algorithm, Learning to Stabilize from Zero (LTS<sub>0</sub>), that utilizes a  
 132 decomposition of the state space based on a characterization of the notion of unstable “modes”. The  
 133 decomposition and other preliminaries for the algorithm are first introduced in Section 3.1, and then  
 134 we proceed to describe LTS<sub>0</sub> in Section 3.2.

### 135 3.1 Algorithm Preliminaries

136 We first introduce the decomposition of the state space in Section 3.1.1, which formally defines the  
 137 “small part” of  $A$  mentioned in the introduction. Then, we introduce  $\tau$ -hop control in Section 3.1.2,

<sup>1</sup>More sophisticated exploration strategies might be adopted to learn  $(A, B)$  [13, 15, 44], but as long as the control inputs do not completely cancel out the “dominant part” of the states, the above intuition still holds to a large extent as the “dominant part” of the state is still blowing up exponentially.

so that we can construct a stabilizing controller based only on the “small part” of  $A$  (as opposed to the entire  $A$ ). Together, these two ideas form the basis of  $\text{LTS}_0$ .

### 3.1.1 Decomposition of the State Space

Consider the open-loop system  $x_{t+1} = Ax_t$ . Suppose  $A$  is diagonalizable, and let  $\lambda_1, \dots, \lambda_n$  denote the eigenvalues of  $A$ , which are assumed to be distinct and satisfy

$$|\lambda_1| \geq |\lambda_2| \geq \dots \geq |\lambda_k| > 1 > |\lambda_{k+1}| \geq \dots \geq |\lambda_n|.$$

We define the *eigenspaces* associated to these eigenvalues: for a real eigenvalue  $\lambda_i \in \mathbb{R}$  corresponding to eigenvector  $v_i \in \mathbb{R}^n$ , we associate with it a 1-dimensional space  $E_i = \text{span}(v_i)$ ; for a complex eigenvalue  $\lambda_i \in \mathbb{C} \setminus \mathbb{R}$  corresponding to eigenvector  $v_i \in \mathbb{C}^n$ , there must exist some  $j$  such that  $\lambda_j = \bar{\lambda}_i$  (corresponding to eigenvector  $v_j = \bar{v}_i$ ), and we associate with them a 2-dimensional space  $E_i = E_j = \text{span}((v_i + \bar{v}_i), i(v_i - \bar{v}_i))$ . Further, define the *unstable subspace*  $E_u := \bigoplus_{i \leq k} E_i$  and *stable subspace*  $E_s := \bigoplus_{i > k} E_i$ .

As discussed earlier, we only need to learn “a small effective part” of  $A$  associated with the unstable “modes”, or the unstable eigenvectors of  $A$ . For this purpose, in the following we formally define a decomposition based on the orthogonal projection onto the unstable subspace  $E_u$ . This decomposition forms the foundation of our algorithm.

**The  $E_u \oplus E_u^\perp$ -decomposition.** Suppose the unstable subspace  $E_u$  and its orthogonal complement  $E_u^\perp$  are given by *orthonormal* bases  $P_1 \in \mathbb{R}^{n \times k}$  and  $P_2 \in \mathbb{R}^{n \times (n-k)}$ , respectively, namely

$$E_u = \text{col}(P_1), \quad E_u^\perp = \text{col}(P_2).$$

Let  $P = [P_1 \ P_2]$ , which is also orthonormal and thus  $P^{-1} = P^\top = [P_1^\top \ P_2^\top]^\top$ . For convenience, let  $\Pi_1 := P_1 P_1^\top$  and  $\Pi_2 := P_2 P_2^\top$  be the *orthogonal* projectors onto  $E_u$  and  $E_u^\perp$ , respectively. With the state space decomposition, we proceed to decompose matrix  $A$ . Note that  $E_u$  is an invariant subspace with regard to  $A$  (but  $E_u^\perp$  not necessarily is), there exists  $M_1 \in \mathbb{R}^{k \times k}$ ,  $\Delta \in \mathbb{R}^{k \times (n-k)}$  and  $M_2 \in \mathbb{R}^{(n-k) \times (n-k)}$ , such that

$$AP = P \begin{bmatrix} M_1 & \Delta \\ & M_2 \end{bmatrix} \Leftrightarrow M := \begin{bmatrix} M_1 & \Delta \\ & M_2 \end{bmatrix} = P^{-1}AP.$$

In the decomposition, the top-left block  $M_1 \in \mathbb{R}^{k \times k}$  represents the action of  $A$  on the unstable subspace. Matrix  $M_1$ , together with  $P_1$ , is the “small part” we discussed in the introduction. Note that  $M_1(P_1)$  is only  $k$ -by- $k$  ( $n$ -by- $k$ ) and thus takes much fewer samples to learn compared to the entire  $A$ . It is also evident that  $M_1$  inherits all unstable eigenvalues of  $A$ , while  $M_2$  inherits all stable eigenvalues. Finally, we provide the system dynamics in the transformed coordinates. Let  $y = [y_1^\top \ y_2^\top]^\top$  be the coordinate representation of  $x$  in the basis formed by column vectors of  $P$  (i.e.,  $x = Py$ ). The system dynamics in  $y$ -coordinates is

$$\begin{bmatrix} y_{1,t+1} \\ y_{2,t+1} \end{bmatrix} = P^{-1}AP \begin{bmatrix} y_{1,t} \\ y_{2,t} \end{bmatrix} + P^{-1}Bu_t = \begin{bmatrix} M_1 & \Delta \\ & M_2 \end{bmatrix} \begin{bmatrix} y_{1,t} \\ y_{2,t} \end{bmatrix} + \begin{bmatrix} P_1^\top B \\ P_2^\top B \end{bmatrix} u_t. \quad (1)$$

**The  $E_u \oplus E_s$ -decomposition.** In the above  $E_u \oplus E_u^\perp$ -decomposition,  $E_u^\perp$  is in general *not* an invariant subspace with respect to  $A$ . This can be seen from the top-right  $\Delta$  block in  $M$ , which represents how much of the state is “moved” by  $A$  from  $E_u^\perp$  into  $E_u$  in one step. The absence of invariant properties in  $E_u^\perp$  is sometimes inconvenient in the analysis. Hence, we introduce another invariant decomposition that is used in the proof as follows. Specifically,  $\mathbb{R}^n$  can be naturally decomposed into  $E_u \oplus E_s$ , and further both  $E_u$  and  $E_s$  are invariant with respect to  $A$ . We also represent  $E_u = \text{col}(Q_1)$  and  $E_s = \text{col}(Q_2)$  by their *orthonormal* bases, and define  $Q = [Q_1 \ Q_2]$ . Note that, these two subspaces are generally not orthogonal, so we additionally define  $Q^{-1} =: [R_1^\top \ R_2^\top]^\top$ . Details are deferred to Appendix A.1.

Lastly, we comment that when  $A$  is symmetric, the  $E_u \oplus E_u^\perp$ - and  $E_u \oplus E_s$ -decompositions are identical because  $E_u^\perp = E_s$  in such symmetric cases. While  $E_u^\perp \neq E_s$  in general cases, the “closeness” between  $E_u^\perp$  and  $E_s$  also contributes to the sample complexity bound in Section 4. For that reason, we formally define such “closeness” between subspaces in Definition 3.1. We point out that the definition has clear geometric interpretations and leads to connections between the bases of  $E_s$  and  $E_u^\perp$ , which is technical and thus deferred to Appendix A.2.

**Definition 3.1** ( $\xi$ -close subspaces). For  $\xi \in (0, 1]$ , the subspaces  $E_u^\perp = \text{col}(P_2)$ ,  $E_s = \text{col}(Q_2)$  are called  $\xi$ -close to each other, if and only if  $\sigma_{\min}(P_2^\top Q_2) > 1 - \xi$ .

### 3.1.2 $\tau$ -hop Control

This section discusses the design of controller based only on the “small part” of  $A$ , i.e., the  $P_1$  and  $M_1$  matrices discussed in Section 3.1.1, as opposed to the entire  $A$  matrix. Note that the main objective of this subsection is to introduce the idea of our controller design when  $M_1$  and  $P_1$  are known without errors, whereas in Section 3.2 we fully introduce Algorithm 1 that learns  $M_1$  and  $P_1$  before constructing the stabilizing controller.

As discussed in Section 3.1.1, we can view  $M_1$  as the “restriction” of  $A$  onto the unstable subspace  $E_u$  (spanned by the basis in  $P_1$ ) and it captures all the unstable eigenvalues of  $A$ . Since only  $M_1$  and  $P_1$  are known while  $M_2$  and  $P_2$  are unknown, a simple idea is to “restrict” the system trajectory entirely to  $E_u$  such that the effect of  $A$  is fully captured by  $M_1$ , the part of  $A$  that is known. However, such a restriction is not possible because, even if the current state  $x_t$  is in  $E_u$  (so  $Ax_t$  is also in  $E_u$ ),  $x_{t+1} = Ax_t + Bu_t$  is generally not in  $E_u$  for non-zero  $u_t$ . To address this issue, recall that a desirable property of the stable component is that it spontaneously dies out in open loop. Therefore, we propose the following  $\tau$ -hop controller design, where the control input is only injected every  $\tau$  steps — in this way, we let the stable component die out exponentially between two consecutive control injections. Consequently, when we examine the states every  $\tau$  steps, we could expect that the trajectory appears approximately “restricted to” the unstable subspace  $E_u$ .

More formally, a  $\tau$ -hop controller only injects non-zero  $u_t$  for  $t = s\tau$ ,  $s \in \mathbb{N}$ . Let  $\tilde{x}_s := x_{s\tau}$  and  $\tilde{u}_s := u_{s\tau}$  to be the state and input every  $\tau$  time steps. We can write the dynamics of the  $\tau$ -hop control system as  $\tilde{x}_{s+1} = A^\tau \tilde{x}_s + A^{\tau-1} B \tilde{u}_s$ . We also let  $\tilde{y}_s$  to denote the state under  $E_u \oplus E_u^\perp$ -decomposition, i.e.  $\tilde{y}_s = P^\top \tilde{x}_s$ . Then the state evolution can be written as

$$\begin{bmatrix} \tilde{y}_{1,s+1} \\ \tilde{y}_{2,s+1} \end{bmatrix} = P^{-1} A^\tau P \begin{bmatrix} \tilde{y}_{1,s} \\ \tilde{y}_{2,s} \end{bmatrix} + P^{-1} A^{\tau-1} B \tilde{u}_s = M^\tau \begin{bmatrix} \tilde{y}_{1,s} \\ \tilde{y}_{2,s} \end{bmatrix} + \begin{bmatrix} P_1^\top A^{\tau-1} B \\ P_2^\top A^{\tau-1} B \end{bmatrix} \tilde{u}_s, \quad (2)$$

where we define  $B_\tau := P_1^\top A^{\tau-1} B$  for simplicity, and

$$M^\tau = \left( \begin{bmatrix} M_1 & \\ & M_2 \end{bmatrix} + \begin{bmatrix} \mathbf{0} & \Delta \\ & \mathbf{0} \end{bmatrix} \right)^\tau = \begin{bmatrix} M_1^\tau & \sum_{i=0}^{\tau-1} M_1^i \Delta M_2^{\tau-1-i} \\ & M_2^\tau \end{bmatrix} =: \begin{bmatrix} M_1^\tau & \Delta_\tau \\ & M_2^\tau \end{bmatrix}.$$

Now we consider a state feedback controller  $\tilde{u}_s = K_1 \tilde{y}_{1,s}$  in the  $\tau$ -hop control system that only acts on the unstable component  $\tilde{y}_{1,s}$ , the closed-loop dynamics of which can then be written as

$$\tilde{y}_{s+1} = \begin{bmatrix} M_1^\tau + P_1^\top A^{\tau-1} B K_1 & \Delta_\tau \\ P_2^\top A^{\tau-1} B K_1 & M_2^\tau \end{bmatrix} \tilde{y}_s. \quad (3)$$

In (3), the bottom-left block becomes  $P_2^\top A^{\tau-1} B K_1$ , which is exponentially small in  $\tau$ . Therefore, with a properly chosen  $\tau$ , the closed-loop dynamical matrix in (3) is almost block-upper-triangular with the bottom-right block very close to  $\mathbf{0}$  (recall that  $M_2$  is a stable matrix). As a result, if we select  $K_1$  such that  $M_1^\tau + P_1^\top A^{\tau-1} B K_1$  is stable, then (3) will become stable as well. There are different ways to select such  $K_1$ , and in this paper, we focus on the simple case that  $B$  is an  $n$ -by- $k$  matrix and  $P_1^\top A^{\tau-1} B$  is an invertible square matrix (see Assumption 4.3), in which case selecting

$$K_1 = -(P_1^\top A^{\tau-1} B)^{-1} M_1^\tau \quad (4)$$

will suffice. Note that such a controller design will also need the knowledge of  $P_1^\top A^{\tau-1} B$ , which has the same dimension as  $M_1$  (a  $k$ -by- $k$  matrix) and takes only  $O(k)$  additional samples to learn. For the case that  $B$  is not  $n$ -by- $k$ , similar controller design can be done (but in a slightly more involved way), and we defer the discussion to Appendix C.

Finally, we end this section by pointing out that for the case of symmetric  $A$ , selecting  $\tau = 1$  should work well. This is because  $\Delta_\tau = \mathbf{0}$  in (3) for the symmetric case, and therefore, the matrix in (3) will be triangular even for  $\tau = 1$ . This will result in a simpler algorithm and controller design, and hence a better sample complexity bound, which we will present as Theorem 4.2 in Section 4.

## 3.2 Algorithm

Our algorithm, LTS<sub>0</sub>, is divided into 4 stages: (i) learn an orthonormal basis  $P_1$  of the unstable subspace  $E_u$  (Stage 1); (ii) learn  $M_1$ , the restriction of  $A$  onto the subspace  $E_u$  (Stage 2); (iii) learn

225  $B_\tau = P_1^\top A^{\tau-1} B$  (Stage 3); and (iv) design a controller that seeks to cancel out the “unstable”  $M_1$   
 226 matrix (Stage 4). This is formally described as Algorithm 1 below.

---

**Algorithm 1** LTS<sub>0</sub>: learning a  $\tau$ -hop stabilizing controller.

---

- 1: **Stage 1: learn the unstable subspace of  $A$ .**
  - 2: Run the system in open loop for  $t_0$  steps for initialization.
  - 3: Run the system in open loop for  $k$  more steps and let  $D \leftarrow [x_{t_0+1} \cdots x_{t_0+k}]$ .
  - 4: Calculate  $\hat{\Pi}_1 \leftarrow D(D^\top D)^{-1} D^\top$ .
  - 5: Calculate the top  $k$  (normalized) eigenvectors  $\hat{v}_1, \dots, \hat{v}_k$  of  $\hat{\Pi}_1$ , and let  $\hat{P}_1 \leftarrow [\hat{v}_1 \cdots \hat{v}_k]$ .
  - 6: **Stage 2: approximate  $M_1$  on the unstable subspace.**
  - 7: Solve the least squares  $\hat{M}_1 \leftarrow \arg \min_{M_1 \in \mathbb{R}^{k \times k}} \mathcal{L}(M_1) := \sum_{t=t_0+1}^{t_0+k} \|\hat{P}_1^\top x_{t+1} - \hat{M}_1 \hat{P}_1^\top x_t\|^2$ .
  - 8: **Stage 3: restore  $B_\tau$  for  $\tau$ -hop control.**
  - 9: **for**  $i = 1, \dots, k$  **do**
  - 10:     Let the system run in open loop for  $\omega$  time steps.
  - 11:     Run for  $\tau$  more steps with initial  $u_{t_i} = \alpha \|x_{t_i}\| e_i$ , where  $t_i = t_0 + k + i\omega + (i-1)\tau$ .
  - 12: Let  $\hat{B}_\tau \leftarrow [\hat{b}_1 \cdots \hat{b}_k]$ , where the  $i^{\text{th}}$  column  $\hat{b}_i \leftarrow \frac{1}{\alpha \|x_{t_i}\|} (\hat{P}_1^\top x_{t_i+\tau} - \hat{M}_1^\top \hat{P}_1^\top x_{t_i})$ .
  - 13: **Stage 4: construct a  $\tau$ -hop stabilizing controller  $\hat{K}$ .**
  - 14: Construct the  $\tau$ -hop stabilizing controller  $\hat{K} \leftarrow -\hat{B}_\tau^{-1} \hat{M}_1^\top \hat{P}_1^\top$ .
- 

227 In the remainder of this section we provide detailed descriptions of the four stages in LTS<sub>0</sub>.

228 **Stage 1: Learn the unstable subspace of  $A$ .** It suffices to learn an orthonormal basis of  $E_u$ . We  
 229 notice that, when  $A$  is applied recursively, it will push the state closer to  $E_u$ . Therefore, when we  
 230 let the system run in open loop (with control input  $u_t \equiv 0$ ) for  $t_0$  time steps, the ratio between  
 231 the norms of unstable and stable components will be magnified exponentially, and the state lies  
 232 “almost” in  $E_u$ . As a result, the subspace spanned by the next  $k$  states, i.e. the column space of  
 233  $D := [x_{t_0+1} \cdots x_{t_0+k}]$ , is very close to  $E_u$ . This motivates us to use the orthogonal projector  
 234 onto  $\text{col}(D)$ , namely  $\hat{\Pi}_1 = D(D^\top D)^{-1} D^\top$ , as an estimation of the projector  $\Pi_1 = P_1 P_1^\top$  onto  
 235  $E_u$ . Finally, the columns of  $\hat{P}_1$  are restored by taking the top  $k$  eigenvectors of  $\hat{\Pi}_1$  with largest  
 236 eigenvalues (they should be very close to 1), which form a basis of the estimated unstable subspace.

237 **Stage 2: Learn  $M_1$  on the unstable subspace.** Recall that  $M_1$  is the “dynamical matrix” for the  
 238  $E_u$ -component under the  $E_u \oplus E_u^\perp$ -decomposition. Therefore, to estimate  $M_1$ , we first calculate the  
 239 coordinates of the states  $x_{t_0+1:t_0+k}$  under basis  $P_1$ ; that is,  $\hat{y}_{1,t} = \hat{P}_1^\top x_t$ , for  $t = t_0 + 1, \dots, t_0 + k$ .  
 240 Then, we use least squares to estimate  $M_1$ , which minimizes the square loss over  $\hat{M}_1$

$$\mathcal{L}(\hat{M}_1) := \sum_{t=t_0+1}^{t_0+k} \|\hat{y}_{1,t+1} - \hat{M}_1 \hat{y}_{1,t}\|^2 = \sum_{t=t_0+1}^{t_0+k} \|\hat{P}_1^\top x_{t+1} - \hat{M}_1 \hat{P}_1^\top x_t\|^2. \quad (5)$$

241 It can be shown that the unique solution to (5) is  $\hat{M}_1 = \hat{P}_1^\top A \hat{P}_1$  (see Appendix B).

242 **Stage 3: Restore  $B_\tau$  for  $\tau$ -hop control.** In this step, we restore the  $B_\tau$  that quantifies the “effective  
 243 component” of control inputs restricted to  $E_u$  (see Section 3.1.2 for detailed discussion). Note that  
 244 equation (2) shows

$$y_{1,t_i+\tau} = M^\tau y_{1,t_i} + \Delta_\tau y_{2,t_i} + B_\tau u_{t_i}.$$

245 Hence, for the purpose of estimation, we simply ignore the  $\Delta_\tau$  term, and take the  $i^{\text{th}}$  column as

$$\hat{b}_i \leftarrow \frac{1}{\|u_{t_i}\|} (\hat{P}_1^\top x_{t_i+\tau} - \hat{M}_1^\top \hat{P}_1^\top x_{t_i}),$$

246 where  $u_{t_i}$  is parallel to  $e_i$  with magnitude  $\alpha \|x_{t_i}\|$  for normalization. Here we introduce an adjustable  
 247 constant  $\alpha$  to guarantee that the  $E_u$ -component still constitutes a non-negligible proportion of the  
 248 state after injecting  $u_{t_i}$ , so that the iterative restoration of columns could continue.

249 It is evident that the ignored  $\Delta_\tau P_2^\top x_{t_i}$  term will introduce an extra estimation error. Since  $\Delta_\tau$   
 250 contains a factor of  $M_1^{\tau-1} \Delta$  that explodes with respect to  $\tau$ , this part can only be bounded if  $\frac{\|P_2^\top x_{t_i}\|}{\|x_{t_i}\|}$   
 251 is sufficiently small. For this purpose, we introduce  $\omega$  heat-up steps (running in open loop with 0  
 252 control input) to reduce the ratio to an acceptable level, during which time the projection of state  
 253 onto  $E_u^\perp$  automatically diminishes over time since  $\rho(M_2) = |\lambda_{k+1}| < 1$ .

**Stage 4: Construct a  $\tau$ -hop stabilizing controller  $K$ .** Finally, we can design a controller that cancels out  $M_1^\top$  in the  $\tau$ -hop system. As mentioned in Section 3.1.2, we shall focus on the case where  $B$  is an  $n$ -by- $k$  matrix for the sake of exposition (the case for general  $B$  will be discussed in Appendix C). The invertibility of  $B_\tau$  can be guaranteed under certain conditions (Assumption 4.3); further,  $\hat{B}_\tau$  is also invertible as long as it is close enough to  $B_\tau$ . In this case, the  $\tau$ -hop stabilizing controller can be simply designed as  $\hat{K}_1 = -\hat{B}_\tau^{-1}\hat{M}_1^\top$  in  $y$ -coordinates where we replace  $B_\tau$  and  $M_1$  in (4) with their estimates. When we return to the original  $x$ -coordinates, the controller becomes  $\hat{K} = -\hat{B}_\tau^{-1}\hat{M}_1^\top\hat{P}_1^\top$ . Note that  $\hat{K}$  (and  $\hat{K}_1$ ) appears with a hat to emphasize the use of estimated projector  $\hat{P}_1$ , which introduces an extra estimation error to the final closed-loop dynamics.

It is evident that the algorithm terminates in  $t_0 + k(1 + \omega + \tau)$  time steps. In the next section, we show how to choose the parameters to guarantee both stability and sub-linear sample complexity.

## 4 Stability Guarantee

In this section, we formally state the assumptions and show the sample complexity for the proposed algorithm to find a stabilizing controller. Our first assumption is regarding the spectral properties of  $A$ , where we require all eigenvalues to appear without multiplicity (so that we can learn a complete basis of each eigenspace), and marginally stable eigenvalues (i.e., those with moduli 1) are eliminated (so that eigenspaces are either stable or unstable). We would like to point out that it is common practice (e.g., [49]) to discuss marginally stable eigenvalues separately, since it obscures the distinction between stable and unstable components and is thus technically challenging.

**Assumption 4.1** (Spectral Property).  *$A$  is diagonalizable with instability index  $k$ , with distinct eigenvalues  $\lambda_1, \dots, \lambda_n$  satisfying  $|\lambda_1| \geq |\lambda_2| \geq \dots \geq |\lambda_k| > 1 > |\lambda_{k+1}| \geq \dots \geq |\lambda_n|$ .*

The assumption is mild in the sense that matrices satisfying Assumption 4.1 are dense in  $\mathbb{R}^{n \times n}$ , and our final complexity bound only depends logarithmically on the diagonalization condition number  $\kappa_d(A)$  and the eigen-gap  $\lambda_k/\lambda_{k+1}$  (see Theorem 4.1 and the discussion below). Thus any matrix  $A$  that violates Assumption 4.1 can be handled via small perturbations.

Our second assumption is regarding how to choose the initial state, which again is standard. The initialization must be randomized to eliminate the coincidence where  $x_0$  has zero (oblique) projection onto some eigenvector  $v_i$ , in which case we cannot learn about  $v_i$  and thus  $D$  is not invertible.

**Assumption 4.2** (Initialization). *The initial state of the system is sampled uniformly at random on the unit hyper-sphere surface in  $\mathbb{R}^n$ .*

Lastly, we impose an assumption regarding controllability within the unstable subspace  $E_u$ .

**Assumption 4.3** ( $c$ -Effective Control within Unstable Subspace).  *$B \in \mathbb{R}^{n \times k}$ ,  $\sigma_{\min}(R_1 B) > c\|B\|$ .*

As mentioned in Section 3.1.2, we assume  $B$  has  $k$  columns for the ease of exposition, and the case for general  $B$  is discussed in Appendix C. In Assumption 4.3, recall matrix  $R_1$  that was defined in the  $E_u \oplus E_s$ -decomposition in Section 3.1.1. Intuitively, Assumption 4.3 characterizes “effective controllability in  $E_u$ ” in the following sense: every direction in the unstable subspace receives at least a proportion of  $c$  from the influence of any control input. This assumption is reasonable in that, if  $\sigma_{\min}(R_1 B) \approx 0$ , the control input  $u$  has to be very large to push the state along the direction corresponding to the smallest singular value, which could induce excessively large control cost.

In the following we present the main performance guarantees for our algorithm.

**Theorem 4.1** (Main Theorem). *Given a noiseless LTI system  $x_{t+1} = Ax_t + Bu_t$  subject to Assumptions 4.1, 4.2 and 4.3, and additionally  $|\lambda_1|^2|\lambda_{k+1}| < |\lambda_k|$ , by running  $LTS_0$  with parameters*

$$\tau = O(1), \omega = O(\ell \log k), \alpha = O(1), t_0 = O(k \log n)$$

*that terminates within  $t_0 + k(1 + \omega + \tau) = O(k \log n)$  time steps, the closed-loop system is exponentially stable with probability  $1 - O(k^{-\ell})$  over the initialization of  $x_0$  for any  $\ell \in \mathbb{N}$ . Here the big- $O$  notation only shows dependence on  $k$  and  $n$ , while hiding parameters like  $|\lambda_1|$ ,  $|\lambda_k|$ ,  $|\lambda_{k+1}|$ ,  $\|A\|$ ,  $\|B\|$ ,  $c$ ,  $\alpha$ ,  $\xi$  (recall that  $E_u^\perp$  and  $E_s$  are  $\xi$ -close),  $\chi(\hat{L}_\tau)$  (see Lemma D.1), and  $\zeta_\epsilon(\cdot)$  (see Lemma G.1), and details can be found in equations (41) through (46).*

Theorem 4.1 shows the proposed  $LTS_0$  can find a stabilizing controller in  $\tilde{O}(k)$  steps, which incurs a state norm of  $2^{\tilde{O}(k)}$ , significantly smaller than the state-of-the-art  $2^{\Theta(n)}$  in the  $k \ll n$  regime. We

would like to point out that this does not violate the lower bound shown in [15], since the state norm degenerates to  $2^{\Theta(n)}$  when  $k = \Theta(n)$ , and might degrade arbitrarily for systems with adversarially designed parameters. Still, for a large proportion of systems with  $k \ll n$  and favorable constants, our algorithm achieves better performance than the naive ones. The theoretical result is also verified by numerical experiments, the details of which can be found in Appendix H.

**Discussion on constants.** Curious readers can refer to Appendix G (equations (41) through (46)) for detailed expressions of the constants hidden behind the big-O notation in the theorem; Table 1 also summarizes all instance-specific constants appearing in the bound. Here we provide a brief overview how the bound depends on the system parameters. It is evident that, for a system with larger  $\xi$  (i.e., when  $E_u$  and  $E_s$  are “less orthogonal” to each other) or smaller  $c$  (i.e., when it costs more to control the unstable subspace), we see a larger  $\tau$  in (41), a smaller  $\alpha$  in (43), and larger  $t_0$  and  $\omega$  in (45) and (46), respectively, which altogether incur a larger constant term in the sample complexity. This is in accordance with our intuition of the state space decomposition and Assumption 4.3, respectively.

The bound also relies heavily on the spectral properties of  $A$ . The constraint  $|\lambda_1|^2 |\lambda_{k+1}| < |\lambda_k|$  ensures validity of (41), which is necessary for cancelling out the combined effect of non-orthogonal subspaces  $E_u$  and  $E_s$  (resulting in  $\Delta_\tau$  in the top-right block) and inaccurate basis  $\hat{P}_1$  (resulting in projection error in the bottom-left block) — a system with larger ratio  $|\lambda_1|^2 |\lambda_{k+1}| / |\lambda_k|$  suffers from more severe side-effects, and thus requires a larger  $\tau$  and a higher sample complexity. Nevertheless, we believe that this assumption is not essential, and we leave it as future work to relax it.

Another important parameter is the eigen-gap  $|\lambda_k| / |\lambda_{k+1}|$  around 1 that determines how fast the stable and unstable components become separable in magnitude when the system runs in open loop, which is utilized in the  $t_0$  initialization steps of Stage 1 and  $\omega$  heat-up steps of Stage 3. Consequently, a system with smaller eigen-gap  $|\lambda_k| / |\lambda_{k+1}|$  requires a larger  $t_0$  (see (10)) and  $\omega$  (see (46)) and therefore a higher sample complexity.

The diagonalization condition number  $\kappa_d(A)$  of  $A$  also contributes to the bound of  $t_0$ , the number of initialization steps. It is intuitive that, a large  $\kappa_d(A)$  indicates less orthogonal eigenspaces, which in turn requires a more distinct separation among the magnitudes of different eigen-components of  $x_{t_0}$ , so that the stable components does not interfere with the unstable ones.

Finally, we would like to point out that all these quantities appear in the bound as *logarithmic* terms, indicating that the sample complexity only degrades mildly when the constants become worse.

**A warm-up case.** Despite the generality of Theorem 4.1, its proof involves technical difficulties. In Theorem 4.2, we include results for the special case where  $A$  is real symmetric, which leads to a simpler choice of algorithm parameters and a cleaner sample complexity bound.

**Theorem 4.2.** *Given a noiseless LTI system  $x_{t+1} = Ax_t + Bu_t$  subject to Assumptions 4.1, 4.2 and 4.3 with symmetric  $A$ , by running  $LTS_0$  with parameters  $\tau = 1$ ,  $\omega = 0$ ,  $\alpha = 1$ ,  $t_0 = O(k \log n)$  that terminates within  $t_0 + k(1 + \omega + \tau) = O(k \log n)$  time steps, the closed-loop system is exponentially stable with probability 1 over the initialization of  $x_0$ . Here the big-O notation only shows dependence on  $k$  and  $n$ , while hiding parameters like  $|\lambda_1|$ ,  $|\lambda_k|$ ,  $|\lambda_{k+1}|$ ,  $\|A\|$ ,  $\|B\|$ ,  $c$ , and  $\chi(\hat{L}_1)$  (see Lemma D.1), and details can be found in equation (18).*

Although Theorem 4.2 takes a simpler form, its proof still captures the main insight of our analysis. For this reason, we use the proof of Theorem 4.2 as a warm-up example in Appendix F before we present the proof ideas of the main Theorem 4.1.

## 5 Proof Outline

In this section we will give a high-level overview of the key proof ideas for the main theorems. The full proof details can be found in Appendices E, F and G as indicated below.

**Proof Structure.** The proof is largely divided into two steps. In Step 1, we examine how accurate the learner estimates the unstable subspace  $E_u$  in Stage 1 and 2. We will show that  $\Pi_1$ ,  $P_1$  and  $M_1$  can be estimated up to an error of  $\delta$  within  $t_0 = O(k \log n - \log \delta)$  steps. In Step 2, we examine the estimation error of  $M_1$  and  $B_\tau$  in Stage 2 and 3 (and thus  $\hat{K}_1$ ), based on which we will eventually show that the  $\tau$ -hop controller output by Algorithm 1 makes the system asymptotically stable. The proof is based on a detailed spectral analysis of the dynamical matrix of the closed-loop system.



354 **Overview of Step 1.** To upper bound the estimation errors in Stage 1 and 2, we only have to notice  
 355 that the estimation error of  $\hat{\Pi}_1$  completely captures how well the unstable subspace is estimated, and  
 356 all other bounds should follow directly from it. The bound on  $\|\Pi_1 - \hat{\Pi}_1\|$  is shown in Theorem 5.1,  
 357 together with a bound on  $\|P_1 - \hat{P}_1\|$  as in Corollary 5.2.

358 **Theorem 5.1.** *For a noiseless linear dynamical system  $x_{t+1} = Ax_t$ , let  $E_u$  be the unstable subspace  
 359 of  $A$ ,  $k = \dim E_u$  be the instability index of the system, and  $\Pi_1$  be the orthogonal projector onto  
 360 subspace  $E_u$ . Then for any  $\varepsilon > 0$ , by running Stage 1 of Algorithm 1 with an arbitrary initial state  
 361 that terminates in  $(t_0 + k)$  time steps, where*

$$t_0 = O\left(\frac{k \log n - \log \varepsilon + \log \kappa_d(A)}{2 \log \frac{|\lambda_k|}{|\lambda_{k+1}|}}\right),$$

362 *the matrix  $D^\top D$  is invertible with probability 1 (where  $D = [x_{t_0+1} \cdots x_{t_0+k}]$ ) and in such cases  
 363 we shall obtain an estimated  $\hat{\Pi}_1 = D(D^\top D)^{-1}D^\top$  with error  $\|\hat{\Pi}_1 - \Pi_1\| < \varepsilon$ .*

364 **Corollary 5.2.** *Under the premises of Theorem 5.1, for any orthonormal basis  $\hat{P}_1$  of  $\text{col}(\hat{\Pi}_1)$  (where  
 365  $\hat{\Pi}_1$  is obtained by Algorithm 1), there exists a corresponding orthonormal basis  $P_1$  of  $\text{col}(\Pi_1)$ , such  
 366 that  $\|\hat{P}_1 - P_1\| < \sqrt{2k\varepsilon} =: \delta$ ,  $\|\hat{M}_1 - M_1\| < 2\|A\|\delta$ .*

367 The proofs are deferred to Appendix E due to limited length.

368 **Overview of Step 2.** To analyze the stability of the closed-loop system, we shall first write out the  
 369 closed-loop dynamics under the  $\tau$ -hop controller. Recall in Section 3.1.2 we have defined  $\tilde{u}_s, \tilde{x}_s, \tilde{y}_s$   
 370 to be the control input, state in  $x$ -coordinates, and state in  $y$ -coordinates in the  $\tau$ -hop control system,  
 371 respectively. Using these notations, the learned controller can be written as

$$\tilde{u}_s = \hat{K} \tilde{x}_s = \hat{K}_1 \hat{P}_1^\top P \tilde{y}_s = \begin{bmatrix} \hat{K}_1 \hat{P}_1^\top P_1 \\ \hat{K}_1 \hat{P}_1^\top P_2 \end{bmatrix} \tilde{y}_s$$

372 in  $y$ -coordinates (as opposed to  $\hat{K}_1 \tilde{y}_s$ ). Therefore, the closed-loop  $\tau$ -hop dynamics should be

$$\tilde{y}_{s+1} = \begin{bmatrix} M_1^\top + P_1^\top A^{\tau-1} B \hat{K}_1 \hat{P}_1^\top P_1 & \Delta_\tau + P_1^\top A^{\tau-1} B \hat{K}_1 \hat{P}_1^\top P_2 \\ P_2^\top A^{\tau-1} B \hat{K}_1 \hat{P}_1^\top P_1 & M_2^\top + P_2^\top A^{\tau-1} B \hat{K}_1 \hat{P}_1^\top P_2 \end{bmatrix} \begin{bmatrix} \tilde{y}_{1,s} \\ \tilde{y}_{2,s} \end{bmatrix} =: \hat{L}_\tau \tilde{y}_s, \quad (6)$$

373 and we will show it to be asymptotically stable (i.e.,  $\rho(\hat{L}_\tau) < 1$ ). Note that  $\hat{L}_\tau$  is given by a 2-by-2  
 374 block form, we can utilize the following lemma to assist the spectral analysis of block matrices, the  
 375 proof of which is deferred to Appendix D.

376 **Lemma 5.3** (block perturbation bound). *For 2-by-2 block matrices  $A = \begin{bmatrix} A_1 & \mathbf{0} \\ \mathbf{0} & A_2 \end{bmatrix}$ ,  $E = \begin{bmatrix} \mathbf{0} & E_{12} \\ E_{21} & \mathbf{0} \end{bmatrix}$ ,  
 377 the spectral radii of  $A$  and  $A + E$  differ by at most  $|\rho(A + E) - \rho(A)| \leq \chi(A + E) \|E_{12}\| \|E_{21}\|$ ,  
 378 where  $\chi(A + E)$  is a constant (see Appendix D).*

379 The above lemma shows a clear roadmap for proving  $\rho(\hat{L}_\tau) < 1$ . First, we need to guarantee stabil-  
 380 ity of the diagonal blocks — the top-left block is stable because  $\hat{K}_1$  is designed to (approximately)  
 381 eliminate it to zero (which requires the estimation error bound on  $B_\tau$ ), and the bottom-right block  
 382 is stable because it is almost  $M_2^\top$  with a negligible error induced by inaccurate projection. Then, we  
 383 need to upper-bound the norms of off-diagonal blocks via careful estimation of factors appearing in  
 384 these blocks. Complete proofs for both cases can be found in Appendices F and G, respectively.

## 385 6 Conclusions

386 This paper provides a new perspective into the learn-to-stabilize problem. We design a novel al-  
 387 gorithm that exploits instance-specific properties to learn to stabilize an unknown LTI system on a  
 388 single trajectory. We show that, under certain assumptions, the sample complexity of the algorithm  
 389 is upper bounded by  $\tilde{O}(k)$ , which avoids the  $2^{\Theta(n)}$  state norm blow-up in the literature in the  $k \ll n$   
 390 regime. This work initiates a new direction in the learn-to-stabilize literature, and many interesting  
 391 and challenging questions remain open, including handling additive disturbances, eliminating the  
 392 assumptions on spectral properties, and developing better ways to learn the unstable subspace.

## References

- [1] John C. Doyle, Bruce A. Francis, and Allen R. Tannenbaum. *Feedback Control Theory*. Courier Corporation, 2013.
- [2] Geir E. Dullerud and Fernando Paganini. *A Course in Robust Control Theory: A Convex Approach*, volume 36. Springer Science & Business Media, 2013.
- [3] Sergey Levine, Chelsea Finn, Trevor Darrell, and Pieter Abbeel. End-to-end training of deep visuomotor policies. *arXiv preprint arXiv:1504.00702*, 2015.
- [4] Yan Duan, Xi Chen, Rein Houthoofd, John Schulman, and Pieter Abbeel. Benchmarking deep reinforcement learning for continuous control. In *International Conference on Machine Learning*, pages 1329–1338, 2016.
- [5] Maryam Fazel, Rong Ge, Sham M. Kakade, and Mehran Mesbahi. Global convergence of policy gradient methods for the linear quadratic regulator. *arXiv preprint arXiv:1801.05039*, 2018.
- [6] Jingjing Bu, Afshin Mesbahi, Maryam Fazel, and Mehran Mesbahi. LQR through the lens of first order methods: Discrete-time case. *arXiv preprint arXiv:1907.08921*, 2019.
- [7] Yingying Li, Yujie Tang, Runyu Zhang, and Na Li. Distributed reinforcement learning for decentralized linear quadratic control: A derivative-free policy optimization approach. *arXiv preprint arXiv:1912.09135*, 2019.
- [8] Steven J. Bradtke, B. Erik Ydstie, and Andrew G. Barto. Adaptive linear quadratic control using policy iteration. In *Proceedings of 1994 American Control Conference-ACC'94*, volume 3, pages 3475–3479. IEEE, 1994.
- [9] Stephen Tu and Benjamin Recht. Least-squares temporal difference learning for the linear quadratic regulator. *arXiv preprint arXiv:1712.08642*, 2017.
- [10] Karl Krauth, Stephen Tu, and Benjamin Recht. Finite-time analysis of approximate policy iteration for the linear quadratic regulator. In *Advances in Neural Information Processing Systems*, pages 8512–8522, 2019.
- [11] Kemin Zhou, John Comstock Doyle, Keith Glover, et al. *Robust and Optimal Control*, volume 40. Prentice Hall New Jersey, 1996.
- [12] Sarah Dean, Horia Mania, Nikolai Matni, Benjamin Recht, and Stephen Tu. On the sample complexity of the linear quadratic regulator. *Foundations of Computational Mathematics*, pages 1–47, 2019.
- [13] Yasin Abbasi-Yadkori and Csaba Szepesvári. Regret bounds for the adaptive control of linear quadratic systems. In *Proceedings of the 24th Annual Conference on Learning Theory*, pages 1–26, 2011.
- [14] Sahin Lale, Kamyar Azizzadenesheli, Babak Hassibi, and Anima Anandkumar. Explore more and improve regret in linear quadratic regulators, 2020.
- [15] Xinyi Chen and Elad Hazan. Black-box control for linear dynamical systems. *arXiv preprint arXiv:2007.06650*, 2021.
- [16] Juan C. Perdomo, Jack Umenberger, and Max Simchowitz. Stabilizing dynamical systems via policy gradient methods. *arXiv preprint arXiv:2110.06418*, 2021.
- [17] Tankred Rautert and Ekkehard W. Sachs. Computational design of optimal output feedback controllers. *SIAM Journal on Optimization*, 7(3):837–852, 1997.
- [18] Karl Mårtensson and Anders Rantzer. Gradient methods for iterative distributed control synthesis. In *Proceedings of the 48th IEEE Conference on Decision and Control (CDC) held jointly with 2009 28th Chinese Control Conference*, pages 549–554. IEEE, 2009.

- [19] Dhruv Malik, Ashwin Pananjady, Kush Bhatia, Koulik Khamaru, Peter L. Bartlett, and Martin J. Wainwright. Derivative-free methods for policy optimization: Guarantees for linear quadratic systems. *arXiv preprint arXiv:1812.08305*, 2018.
- [20] Hesameddin Mohammadi, Armin Zare, Mahdi Soltanolkotabi, and Mihailo R. Jovanović. Convergence and sample complexity of gradient methods for the model-free linear quadratic regulator problem. *arXiv preprint arXiv:1912.11899*, 2019.
- [21] Benjamin Gravell, Peyman Mohajerin Esfahani, and Tyler Summers. Learning robust controllers for linear quadratic systems with multiplicative noise via policy gradient. *arXiv preprint arXiv:1905.13547*, 2019.
- [22] Zhuoran Yang, Yongxin Chen, Mingyi Hong, and Zhaoran Wang. On the global convergence of actor-critic: A case for linear quadratic regulator with ergodic cost. *arXiv preprint arXiv:1907.06246*, 2019.
- [23] Kaiqing Zhang, Zhuoran Yang, and Tamer Basar. Policy optimization provably converges to Nash equilibria in zero-sum linear quadratic games. In *Advances in Neural Information Processing Systems*, pages 11602–11614, 2019.
- [24] Kaiqing Zhang, Bin Hu, and Tamer Basar. Policy optimization for  $H_2$  linear control with  $H_\infty$  robustness guarantee: Implicit regularization and global convergence. In *Learning for Dynamics and Control*, pages 179–190, 2020.
- [25] Luca Furieri, Yang Zheng, and Maryam Kamgarpour. Learning the globally optimal distributed LQ regulator. In *Learning for Dynamics and Control*, pages 287–297, 2020.
- [26] Joao Paulo Jansch-Porto, Bin Hu, and Geir Dullerud. Convergence guarantees of policy optimization methods for Markovian jump linear systems. *arXiv preprint arXiv:2002.04090*, 2020.
- [27] Joao Paulo Jansch-Porto, Bin Hu, and Geir Dullerud. Policy learning of MDPs with mixed continuous/discrete variables: A case study on model-free control of Markovian jump systems. *arXiv preprint arXiv:2006.03116*, 2020.
- [28] Ilyas Fatkhullin and Boris Polyak. Optimizing static linear feedback: Gradient method. *arXiv preprint arXiv:2004.09875*, 2020.
- [29] Yujie Tang, Yang Zheng, and Na Li. Analysis of the optimization landscape of linear quadratic Gaussian (LQG) control. In *Learning for Dynamics and Control*, pages 599–610. PMLR, 2021.
- [30] Asaf B. Cassel and Tomer Koren. Online policy gradient for model free learning of linear quadratic regulators with  $\sqrt{T}$  regret. In *International Conference on Machine Learning*, pages 1304–1313. PMLR, 2021.
- [31] Mohamad K. S. Faradonbeh, Ambuj Tewari, and George Michailidis. Finite time analysis of optimal adaptive policies for linear-quadratic systems. *arXiv preprint arXiv:1711.07230*, 2017.
- [32] Yi Ouyang, Mukul Gagrani, and Rahul Jain. Learning-based control of unknown linear systems with Thompson sampling. *arXiv preprint arXiv:1709.04047*, 2017.
- [33] Sarah Dean, Horia Mania, Nikolai Matni, Benjamin Recht, and Stephen Tu. Regret bounds for robust adaptive control of the linear quadratic regulator. In *Advances in Neural Information Processing Systems*, pages 4188–4197, 2018.
- [34] Alon Cohen, Tomer Koren, and Yishay Mansour. Learning linear-quadratic regulators efficiently with only  $\sqrt{T}$  regret. *arXiv preprint arXiv:1902.06223*, 2019.
- [35] Horia Mania, Stephen Tu, and Benjamin Recht. Certainty equivalent control of LQR is efficient. *arXiv preprint arXiv:1902.07826*, 2019.
- [36] Max Simchowitz and Dylan J. Foster. Naive exploration is optimal for online LQR. *arXiv preprint arXiv:2001.09576*, 2020.

- [37] Max Simchowitz, Karan Singh, and Elad Hazan. Improper learning for non-stochastic control. *arXiv preprint arXiv:2001.09254*, 2020.
- [38] Yang Zheng, Luca Furieri, Maryam Kamgarpour, and Na Li. Sample complexity of linear quadratic Gaussian (LQG) control for output feedback systems. In *Learning for Dynamics and Control*, pages 559–570. PMLR, 2021.
- [39] Orestis Plevrakis and Elad Hazan. Geometric exploration for online control. *Advances in Neural Information Processing Systems*, 33:7637–7647, 2020.
- [40] Tze Leung Lai. Asymptotically efficient adaptive control in stochastic regression models. *Advances in Applied Mathematics*, 7(1):23–45, 1986.
- [41] Han-Fu Chen and Ji-Feng Zhang. Convergence rates in stochastic adaptive tracking. *International Journal of Control*, 49(6):1915–1935, 1989.
- [42] Tze Leung Lai and Zhiliang Ying. Parallel recursive algorithms in asymptotically efficient adaptive control of linear stochastic systems. *SIAM Journal on Control and Optimization*, 29(5):1091–1127, 1991.
- [43] Morteza Ibrahimi, Adel Javanmard, and Benjamin Van Roy. Efficient reinforcement learning for high dimensional linear quadratic systems. *arXiv preprint arXiv:1303.5984*, 2013.
- [44] Mohamad K. S. Faradonbeh, Ambuj Tewari, and George Michailidis. Finite-time adaptive stabilization of linear systems. *IEEE Transactions on Automatic Control*, 64(8):3498–3505, 2019.
- [45] Yang Zheng and Na Li. Non-asymptotic identification of linear dynamical systems using multiple trajectories. *IEEE Control Systems Letters*, 5(5):1693–1698, 2020.
- [46] Lennart Ljung. System identification. *Wiley Encyclopedia of Electrical and Electronics Engineering*, pages 1–19, 1999.
- [47] Max Simchowitz, Horia Mania, Stephen Tu, Michael I. Jordan, and Benjamin Recht. Learning without mixing: Towards a sharp analysis of linear system identification. *arXiv preprint arXiv:1802.08334*, 2018.
- [48] Samet Oymak and Necmiye Ozay. Non-asymptotic identification of LTI systems from a single trajectory. In *2019 American Control Conference (ACC)*, pages 5655–5661. IEEE, 2019.
- [49] Tuhin Sarkar, Alexander Rakhlin, and Munther A. Dahleh. Finite-time system identification for partially observed LTI systems of unknown order. *arXiv preprint arXiv:1902.01848*, 2019.
- [50] Salar Fattahi. Learning partially observed linear dynamical systems from logarithmic number of samples. In *Learning for Dynamics and Control*, pages 60–72. PMLR, 2021.
- [51] Han Wang and James Anderson. Large-scale system identification using a randomized svd. *arXiv preprint arXiv:2109.02703*, 2021.
- [52] Yu Xing, Benjamin Gravell, Xingkang He, Karl Henrik Johansson, and Tyler Summers. Identification of linear systems with multiplicative noise from multiple trajectory data. *arXiv preprint arXiv:2106.16078*, 2021.
- [53] Yuji Nakatsukasa. Off-diagonal perturbation, first-order approximation and quadratic residual bounds for matrix eigenvalue problems. In *Eigenvalue Problems: Algorithms, Software and Applications in Petascale Computing (EPASA)*, Lecture Notes in Computer Science, pages 233–249. Springer, 2015.
- [54] E. A. Rawashdeh. A simple method for finding the inverse matrix of Vandermonde matrix. *Matematicki Vesnik: MV19303*, 2019.
- [55] F. L. Bauer and C. T. Fike. Norms and exclusion theorems. *Numerische Mathematik*, 2:137–141, 1960.

- 530 [56] R. A. Horn and C. R. Johnson. *Matrix Analysis*. Cambridge University Press, 2nd edition,  
531 2013.
- 532 [57] Ioannis Chatzigeorgiou. Bounds on the Lambert function and their application to the outage  
533 analysis of user cooperation. *IEEE Communications Letters*, 17(8):1505—1508, 2013.

## Checklist

### (1) For all authors...

- (a) Do the main claims made in the abstract and introduction accurately reflect the paper's contributions and scope? [\[Yes\]](#)
- (b) Did you describe the limitations of your work? [\[Yes\]](#) See the "future work" part of the conclusions in Section 6.
- (c) Did you discuss any potential negative societal impacts of your work? [\[N/A\]](#) We don't see any potential societal impacts in such theoretical results.
- (d) Have you read the ethics review guidelines and ensured that your paper conforms to them? [\[Yes\]](#)

### (2) If you are including theoretical results...

- (a) Did you state the full set of assumptions of all theoretical results? [\[Yes\]](#) See Section 4.
- (b) Did you include complete proofs of all theoretical results? [\[Yes\]](#) See Appendix D, Appendix E, Appendix F and Appendix G.

### (3) If you ran experiments...

- (a) Did you include the code, data, and instructions needed to reproduce the main experimental results (either in the supplemental material or as a URL)? [\[N/A\]](#)
- (b) Did you specify all the training details (e.g., data splits, hyperparameters, how they were chosen)? [\[N/A\]](#)
- (c) Did you report error bars (e.g., with respect to the random seed after running experiments multiple times)? [\[N/A\]](#)
- (d) Did you include the total amount of compute and the type of resources used (e.g., type of GPUs, internal cluster, or cloud provider)? [\[N/A\]](#)

### (4) If you are using existing assets (e.g., code, data, models) or curating/releasing new assets...

- (a) If your work uses existing assets, did you cite the creators? [\[N/A\]](#)
- (b) Did you mention the license of the assets? [\[N/A\]](#)
- (c) Did you include any new assets either in the supplemental material or as a URL? [\[N/A\]](#)
- (d) Did you discuss whether and how consent was obtained from people whose data you're using/curating? [\[N/A\]](#)
- (e) Did you discuss whether the data you are using/curating contains personally identifiable information or offensive content? [\[N/A\]](#)

### (5) If you used crowdsourcing or conducted research with human subjects...

- (a) Did you include the full text of instructions given to participants and screenshots, if applicable? [\[N/A\]](#)
- (b) Did you describe any potential participant risks, with links to Institutional Review Board (IRB) approvals, if applicable? [\[N/A\]](#)
- (c) Did you include the estimated hourly wage paid to participants and the total amount spent on participant compensation? [\[N/A\]](#)

## Appendix

### A Decomposition of the State Space

#### A.1 The $E_u \oplus E_s$ -decomposition

It is evident that the following two subspaces of  $\mathbb{R}^n$  are invariant with respect to  $A$ , namely

$$E_u := \bigoplus_{i \leq k} E_i, \quad E_s := \bigoplus_{i > k} E_i$$

which we refer to as the *unstable subspace* and the *stable subspace* of  $A$ , respectively. Since the eigenspaces  $E_i$  sum to the whole  $\mathbb{R}^n$  space, one natural decomposition is  $\mathbb{R}^n = E_u \oplus E_s$ ; accordingly, each state can be uniquely decomposed as  $x = x_u + x_s$ , where  $x_u \in E_u$  is called the *unstable component*, and  $x_s \in E_s$  is called the *stable component*.

We also decompose  $A$  based on the  $E_u \oplus E_s$ -decomposition. Suppose  $E_u$  and  $E_s$  are represented by their *orthonormal* bases  $Q_1 \in \mathbb{R}^{n \times k}$  and  $Q_2 \in \mathbb{R}^{n \times (n-k)}$ , respectively, namely

$$E_u = \text{col}(Q_1), \quad E_s = \text{col}(Q_2).$$

Let  $Q = [Q_1 \ Q_2]$  (which is invertible as long as  $A$  is diagonalizable), and let  $R = [R_1^\top \ R_2^\top]^\top := Q^{-1}$ . Further, let  $\Pi_u := Q_1 R_1$  and  $\Pi_s := Q_2 R_2$  be the *oblique* projectors onto  $E_u$  and  $E_s$  (along the other subspace), respectively. Since  $E_u$  and  $E_s$  are both invariant with regard to  $A$ , we know there exists  $N_1 \in \mathbb{R}^{k \times k}$ ,  $N_2 \in \mathbb{R}^{(n-k) \times (n-k)}$ , such that

$$AQ = Q \begin{bmatrix} N_1 & \\ & N_2 \end{bmatrix} \Leftrightarrow N := \begin{bmatrix} N_1 & \\ & N_2 \end{bmatrix} = RAQ.$$

Let  $z = [z_1^\top \ z_2^\top]^\top$  be the coordinate representation of  $x$  in the basis  $Q$  (i.e.,  $x = Qz$ ). The system dynamics in  $z$ -coordinates can be expressed as

$$\begin{bmatrix} z_{1,t+1} \\ z_{2,t+1} \end{bmatrix} = RAQ \begin{bmatrix} z_{1,t} \\ z_{2,t} \end{bmatrix} + RBu_t = \begin{bmatrix} N_1 & \\ & N_2 \end{bmatrix} \begin{bmatrix} z_{1,t} \\ z_{2,t} \end{bmatrix} + \begin{bmatrix} R_1 B \\ R_2 B \end{bmatrix} u_t.$$

The major advantage of this decomposition is that the dynamical matrix in  $z$ -coordinate is block diagonal, so it would be simpler to study the behavior of the open-loop system.

#### A.2 Geometric Interpretation: Principle Angles

Before going any further, we emphasize that Definition 3.1 is well-defined by itself, since singular values are preserved under orthonormal transformations.

It might seem unintuitive to interpret  $\sigma_{\min}(P_2^\top Q_2)$  in Definition 3.1 as a measure of “closeness”. However, this is closely related to the *principle angles* between subspaces that generalize the standard angle measures in lower dimensional cases. More specifically, we can recursively define the  $i^{\text{th}}$  principle angle  $\theta_i$  ( $i = 1, \dots, n-k$ ) as

$$\theta_i := \min \left\{ \arccos \left( \frac{\langle x, y \rangle}{\|x\| \|y\|} \right) \mid \begin{array}{l} x \in E_u^\perp, x \perp \text{span}(x_1, \dots, x_{i-1}); \\ y \in E_s, y \perp \text{span}(y_1, \dots, y_{i-1}). \end{array} \right\} =: \angle(x_i, y_i), \quad (7)$$

where  $x_i$  and  $y_i$  ( $i = 1, \dots, n-k$ ) are referred to as the  $i^{\text{th}}$  principle vectors accordingly. Meanwhile, let  $P_2^\top Q_2 = U \Sigma V^\top$  be the singular value decomposition (SVD), where  $\Sigma = \text{diag}(\sigma_1, \dots, \sigma_{n-k})$  and  $\sigma_1 \geq \dots \geq \sigma_{n-k}$ . Then by an equivalent recursive characterization of singular values, we have

$$\sigma_i = \max_{\substack{\|x\|=\|y\|=1 \\ \forall j < i: x \perp x_j, y \perp y_j}} x^\top P_2^\top Q_2 y =: \bar{x}_i^\top P_2^\top Q_2 \bar{y}_i.$$

Since  $P_2$  and  $Q_2$  are orthonormal,  $\bar{x}_i$  and  $\bar{y}_i$  can be regarded as coordinate representations of  $x_i = P_2 \bar{x}_i$  and  $y_i = Q_2 \bar{y}_i$ , and it can be easily verified that  $x_i$  and  $y_i$  defined in this way are exactly the minimizers in (7). Hence we conclude that  $\sigma_i = \cos \theta_i$ . Therefore,  $E_u^\perp$  and  $E_s$  are  $\xi$ -close if and only if the all principle angles between  $E_u^\perp$  and  $E_s$  lie in the interval  $[0, \arccos(1 - \xi)]$ ; the above argument also shows that we can find orthonormal bases for  $E_u^\perp$  and  $E_s$  so that corresponding vectors form exactly the principle angles.

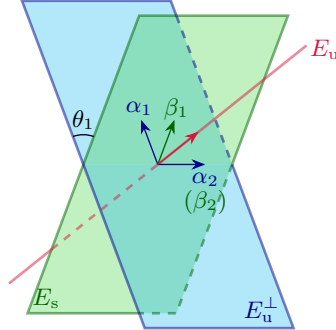

### A.3 Characterization of $\xi$ -close Subspaces

It is naturally expected that the geometric interpretation should inspire more relationships among  $P_1 = Q_1, P_2, Q_2, R_1, R_2$  and  $N_2$ . We would like to emphasize that  $P_1, P_2$  and  $Q_1$  are not confined to bases consisting of eigenvectors (since they are even not necessarily orthonormal). Meanwhile, since they are only used in the stability guarantee proof, we are granted the freedom to select any orthonormal bases. For simplicity, we will stick to the convention that  $P_1 = Q_1$  (and thus  $M_1 = N_1$ ). Further, in Lemma A.1, such freedom is utilized to establish fundamental relationships between the bases in the above two decompositions. The results are concluded as follows.

**Lemma A.1.** Suppose  $E_u^\perp$  and  $E_s$  are  $\xi$ -close. Then we shall select  $P_2$  and  $Q_2$  such that

- (1)  $\sigma_{\min}(P_2^\top Q_2) \geq 1 - \xi$ ,  $\|P_1^\top Q_2\| \leq \sqrt{2\xi}$ ,  $\|P_2 - Q_2\| \leq \sqrt{2\xi}$ .
- (2)  $\|R_2\| \leq \frac{1}{1-\xi}$ ,  $\|N_2\| \leq \frac{1}{1-\xi}\|A\|$ .
- (3)  $\|P_1^\top - R_1\| \leq \frac{\sqrt{2\xi}}{1-\xi}$ ,  $\|R_1\| \leq \frac{\sqrt{2\xi}}{1-\xi} + 1$ .
- (4)  $\|\Delta\| \leq \frac{2-\xi}{1-\xi}\sqrt{2\xi}\|A\|$ .

*Proof.* (1) Following the above interpretation, take arbitrary orthonormal bases  $\bar{P}_2$  and  $\bar{Q}_2$  of  $E_u^\perp$  and  $E_s$ , respectively, and let  $\bar{P}_2^\top \bar{Q}_2 = U \Sigma V^\top$  be the SVD, which translates to

$$(\bar{P}_2 U)^\top (\bar{Q}_2 V) = \Sigma =: \text{diag}(\sigma_1, \dots, \sigma_{n-k}).$$

Since  $U$  and  $V$  are orthonormal matrices, the columns of  $\bar{P}_2 U$  and  $\bar{Q}_2 V$  also form orthonormal bases of  $E_u^\perp$  and  $E_s$ , respectively. Then  $\xi$ -closeness basically says that there exist a basis  $\{\alpha_1, \dots, \alpha_{n-k}\}$  for  $E_u^\perp$ , and a basis  $\{\beta_1, \dots, \beta_{n-k}\}$  for  $E_s$  (both are assumed to be orthonormal), such that

$$\langle \alpha_i, \beta_j \rangle = \delta_{ij} \sigma_i = \begin{cases} \sigma_i \geq 1 - \xi & \text{for any } i = j \\ 0 & \text{for any } i \neq j \end{cases},$$

and we also have  $\Pi_2 \beta_i = \sigma_i \alpha_i$  and  $\Pi_1 \alpha_i = \sigma_i \beta_i$  (recall that  $\Pi_1, \Pi_2$  are orthogonal projectors onto subspaces  $E_u, E_u^\perp$ , respectively). Therefore, without loss of generality, we shall always select  $P_2 = [\alpha_1 \dots \alpha_{n-k}]$  and  $Q_2 = [\beta_1 \dots \beta_{n-k}]$ , such that  $P_2^\top Q_2 = \text{diag}(\sigma_1, \dots, \sigma_{n-k})$ , and

$$\sigma_{\min}(P_2^\top Q_2) = \min_i \sigma_i \geq 1 - \xi.$$

Equivalently speaking, for any  $\beta = Q_2 \eta \in E_s$ , we have (note that  $\|\eta\| = \|\beta\|$ )

$$\|P_2^\top \beta\| = \|P_2^\top Q_2 \eta\| \geq \sigma_{\min}(P_2^\top Q_2) \|\eta\| \geq (1 - \xi) \|\beta\|,$$

and consequently,

$$\|P_1^\top Q_2 \eta\| = \|P_1^\top \beta\| = \sqrt{\|\beta\|^2 - \|P_2^\top \beta\|^2} \leq \sqrt{2\xi} \|\beta\| = \sqrt{2\xi} \|\eta\|,$$

which further shows  $\|P_1^\top Q_2\| \leq \sqrt{2\xi}$ . To bound  $\|P_2 - Q_2\|$ , by definition we have

$$\begin{aligned} \|P_2 - Q_2\| &= \max_{\|\eta\|=1} \|(P_2 - Q_2)\eta\| = \max_{\|\eta\|=1} \left\| \sum_i \eta_i (\alpha_i - \beta_i) \right\| \\ &= \max_{\|\eta\|=1} \sqrt{\sum_{i,j} \eta_i \eta_j (\alpha_i - \beta_i)^\top (\alpha_j - \beta_j)} \\ &= \max_{\|\eta\|=1} \sqrt{\sum_i 2(1 - \mu_i) \eta_i^2} \\ &\leq \max_{\|\eta\|=1} \sqrt{2\xi \sum_i \eta_i^2} = \sqrt{2\xi}. \end{aligned}$$

Here  $\eta = [\eta_1, \dots, \eta_{n-k}]$  is an arbitrary vector in  $\mathbb{R}^{n-k}$ .

(2) By definition,  $I = QR = Q_1 R_1 + Q_2 R_2$ . Also recall that  $P_1 = Q_1$ , so we have  $P_1^\top Q_1 = I$  and  $P_2^\top Q_1 = \mathbf{0}$ . Then by left-multiplying  $P_2^\top$  to the equality, we have

$$P_2^\top = P_2^\top Q_1 R_1 + P_2^\top Q_2 R_2 = P_2^\top Q_2 R_2,$$



636 which further shows

$$\|R_2\| = \|(P_2^\top Q_2)^{-1} P_2^\top\| \leq \|(P_2^\top Q_2)^{-1}\| = \frac{1}{\sigma_{\min}(P_2^\top Q_2)} \leq \frac{1}{1-\xi}.$$

637 Therefore, since  $N_2 = R_2 A Q_2$ , we have

$$\|N_2\| = \|R_2 A Q_2\| \leq \|R_2\| \|A\| \|Q_2\| \leq \frac{1}{1-\xi} \|A\|.$$

638 (3) Similarly, by left-multiplying  $P_1^\top$  to the equality, we have

$$P_1^\top = P_1^\top Q_1 R_1 + P_1^\top Q_2 R_2 = R_1 + P_1^\top Q_2 R_2,$$

639 which further shows

$$\|P_1^\top - R_1\| = \|P_1^\top Q_2 R_2\| \leq \|P_1^\top Q_2\| \|R_2\| \leq \frac{\sqrt{2\xi}}{1-\xi},$$

640 and therefore  $\|R_1\| \leq \|P_1^\top - R_1\| + \|P_1^\top\| = 1 + \frac{\sqrt{2\xi}}{1-\xi}$ .

641 (4) A combination of the above results gives

$$\begin{aligned} \|\Delta\| &= \|P_1^\top A P_2\| = \|P_1^\top A P_2 - R_1 A Q_2\| \\ &\leq \|P_1^\top A (P_2 - Q_2)\| + \|(P_1^\top - R_1) A Q_2\| \\ &\leq \|P_1^\top\| \|A\| \|P_2 - Q_2\| + \|P_1^\top - R_1\| \|A\| \|Q_2\| \\ &\leq \|A\| \sqrt{2\xi} + \frac{\sqrt{2\xi}}{1-\xi} \|A\| = \frac{2-\xi}{1-\xi} \sqrt{2\xi} \|A\|. \end{aligned}$$

642 This completes the proof. □

## 643 B Solution to the Least Squares Problem in Stage 2

644 Lemma B.1 gives the explicit form for the solution to the least squares problem (see Algorithm 1).

645 **Lemma B.1.** Given  $D := [x_{t_0+1} \cdots x_{t_0+k}]$  and  $\hat{P}_1 \hat{P}_1^\top = \hat{\Pi}_1 = D(D^\top D)^{-1} D^\top$ , the solution

$$\hat{M}_1 = \arg \min_{M_1} \sum_{t=t_0+1}^{t_0+k} \|\hat{P}_1^\top x_{t+1} - M_1 \hat{P}_1^\top x_t\|^2$$

646 is uniquely given by  $\hat{M}_1 = \hat{P}_1^\top A \hat{P}_1$ .

647 *Proof.* Here we assume by default that the summation over  $t$  sums from  $t_0 + 1$  to  $t_0 + k$ . Since  $M_1$   
648 is a stationary point of  $\mathcal{L}$ , for any  $\Delta$  in the neighbourhood of  $O$ , we have

$$\begin{aligned} 0 \leq \mathcal{L}(M_1 + \Delta) - \mathcal{L}(M_1) &= \sum_t \|\hat{y}_{1,t+1} - M_1 \hat{y}_{1,t} - \Delta \hat{y}_{1,t}\|^2 - \sum_t \|\hat{y}_{1,t+1} - M_1 \hat{y}_{1,t}\|^2 \\ &= \sum_t \langle \Delta \hat{y}_{1,t}, \hat{y}_{1,t+1} - M_1 \hat{y}_{1,t} \rangle + O(\|\Delta\|^2) \\ &= \sum_t \text{tr}(\hat{y}_{1,t}^\top \Delta^\top (\hat{y}_{1,t+1} - M_1 \hat{y}_{1,t})) + O(\|\Delta\|^2) \\ &= \sum_t \text{tr}(\Delta^\top (\hat{y}_{1,t+1} - M_1 \hat{y}_{1,t}) \hat{y}_{1,t}^\top) + O(\|\Delta\|^2) \\ &= \text{tr}\left(\Delta^\top \sum_t (\hat{y}_{1,t+1} - M_1 \hat{y}_{1,t}) \hat{y}_{1,t}^\top\right) + O(\|\Delta\|^2). \end{aligned}$$

649 Since it always holds for any  $\Delta$ , we must have

$$\sum_t (\hat{y}_{1,t+1} - M_1 \hat{y}_{1,t}) \hat{y}_{1,t}^\top \Leftrightarrow M_1 \sum_t \hat{y}_{1,t} \hat{y}_{1,t}^\top = \sum_t \hat{y}_{1,t+1} \hat{y}_{1,t}^\top.$$

650 Plugging in  $\hat{y}_{1,t} = \hat{P}_1^\top x_t$  and  $\hat{y}_{1,t+1} = \hat{P}_1^\top A x_t$ , we further have

$$M_1 \hat{P}_1^\top X \hat{P}_1 = M_1 \sum_t \hat{P}_1^\top x_t x_t^\top \hat{P}_1 = \sum_t \hat{P}_1^\top A x_t x_t^\top \hat{P}_1 = \hat{P}_1^\top A X \hat{P}_1,$$

651 where  $X := \sum_t x_t x_t^\top = D D^\top$ . Since the columns of  $\hat{P}_1$  form an orthonormal basis of  $\hat{E}_u$ , for any  
 652  $x \in \hat{E}_u$ ,  $\hat{P}_1^\top x$  is the coordinate of  $x$  under that basis. The columns of  $D$  are linearly independent,  
 653 so the columns of  $\hat{P}_1^\top D$  are also linearly independent, which further yields

$$\text{rank}(\hat{P}_1^\top X \hat{P}_1) = \text{rank}((\hat{P}_1^\top D)(\hat{P}_1^\top D)^\top) = \text{rank}(\hat{P}_1^\top D) = k.$$

654 Therefore,  $\hat{P}_1^\top X \hat{P}_1$  is invertible, and  $M_1$  is explicitly given by

$$M_1 = (\hat{P}_1^\top A X \hat{P}_1)(\hat{P}_1^\top X \hat{P}_1)^{-1}.$$

655 Note that  $\hat{H}_1 = \hat{P}_1 \hat{P}_1^\top$  is the projector onto subspace  $\text{col}(D)$ , we must have

$$\hat{P}_1 \hat{P}_1^\top X = (\hat{H}_1 D) D^\top = D D^\top = X,$$

656 which yields

$$M_1 = (\hat{P}_1^\top A (\hat{P}_1 \hat{P}_1^\top X) \hat{P}_1)(\hat{P}_1^\top X \hat{P}_1)^{-1} = (\hat{P}_1^\top A \hat{P}_1)(\hat{P}_1^\top X \hat{P}_1)(\hat{P}_1^\top X \hat{P}_1)^{-1} = \hat{P}_1^\top A \hat{P}_1.$$

657 This completes the proof of Lemma B.1.  $\square$

658 It might help understanding to note that, when  $\hat{P}_1 = P_1$ , for any  $x_t, x_{t+1} \in E_u$  we have

$$P_1^\top A x_t = y_{t+1} = M_1 y_t = M_1 P_1^\top x_t,$$

659 which requires  $P_1^\top A = M_1 P_1^\top$ , or equivalently  $M_1 = P_1^\top A P_1$  (recall  $P_1^\top P_1 = I$ ).

## 660 C Transformation of $B$ with Arbitrary Columns

661 In the remaining sections of this paper, we have always regarded  $B$  as an  $n$ -by- $k$  matrix (i.e.,  $m =$   
 662  $k$ ). In this section, we will show that other cases can be handled in a similar way under proper  
 663 transformations. This is trivial for the case where  $m > k$ , since we can simply select  $k$  linearly  
 664 independent columns from  $B$ , and pad 0's in  $u_t$  for all unselected entries.

665 For the case where  $m < k$ , let  $d = \lceil k/m \rceil$ . Intuitively, we can “pack” every  $d$  consecutive steps to  
 666 obtain a system with sufficient number of control inputs. More specifically, let

$$\tilde{x}_t = \begin{bmatrix} x_{td} \\ x_{td+1} \\ \vdots \\ x_{(t+1)d-1} \end{bmatrix}, \quad \tilde{u}_t = \begin{bmatrix} u_{td-1} \\ u_{td} \\ \vdots \\ u_{(t+1)d-2} \end{bmatrix},$$

$$\tilde{A} = \begin{bmatrix} \mathbf{0} & & A \\ & \ddots & \vdots \\ & & \mathbf{0} & A^{d-1} \\ & & & A^d \end{bmatrix}, \quad \tilde{B} = \begin{bmatrix} B & & & \\ AB & B & & \\ \vdots & \vdots & \ddots & \\ A^{d-1}B & A^{d-2}B & \dots & B \end{bmatrix},$$

667 and consider the transformed system with dynamics

$$\tilde{x}_{t+1} = \tilde{A} \tilde{x}_t + \tilde{B} \tilde{u}_t.$$

668 The instability index of  $\tilde{A}$  is still  $k$ , with  $|\tilde{\lambda}_i| = |\lambda_i|^d$  ( $i = 1, \dots, n$ ). Norms of  $\tilde{A}$  and  $\tilde{B}$  satisfy

$$\|\tilde{A}\| \leq \sqrt{\sum_{i=1}^d \|A^i\|^2} = \|A^d\| O(d), \quad \|\tilde{B}\| \leq \|B\| \sqrt{\sum_{i=1}^d (d-i) \|A^i\|^2} = \|A^d\| \|B\| O(d).$$

669 Since  $d \leq k \ll n$ , the above transformation only multiplies the bounds by a small constant.

## D Proof of Lemma 5.3

Lemma 5.3 is actually a direct corollary of the following lemma, for which we first need to define  $\text{gap}_i(A)$ , the (bipartite)spectral gap around  $\lambda_i$  with respect to  $A$ , namely

$$\text{gap}_i(A) := \begin{cases} \min_{\lambda_j \in \lambda(A_2)} |\lambda_i - \lambda_j| & \lambda_i \in \lambda(A_1) \\ \min_{\lambda_j \in \lambda(A_1)} |\lambda_i - \lambda_j| & \lambda_i \in \lambda(A_2) \end{cases},$$

where  $\lambda(A)$  denotes the spectrum of  $A$ .

**Lemma D.1.** For 2-by-2 block matrices  $A$  and  $E$  in the form

$$A = \begin{bmatrix} A_1 & \mathbf{0} \\ \mathbf{0} & A_2 \end{bmatrix}, \quad E = \begin{bmatrix} \mathbf{0} & E_{12} \\ E_{21} & \mathbf{0} \end{bmatrix},$$

we have

$$|\lambda_i(A + E) - \lambda_i(A)| \leq \frac{\kappa_d(A)\kappa_d(A + E)}{\text{gap}_i(A)} \|E_{12}\| \|E_{21}\|.$$

Here  $\kappa_d(A)$  is the condition number of the matrix consisting of  $A$ 's eigenvectors as columns.

*Proof.* The proof of the lemma can be found in existing literature like [53].  $\square$

*Proof of Lemma 5.3.* Lemma D.1 basically guarantees that every eigenvalue of  $A + E$  is within a distance of  $O(\|E_{12}\| \|E_{21}\|)$  from some eigenvalue of  $A$ . Hence, by defining  $\chi(A + E)$  as the maximum coefficient, namely

$$\chi(A + E) := \frac{\kappa_d(A)\kappa_d(A + E)}{\min_i \{\text{gap}_i(A)\}},$$

we shall guarantee  $|\rho(A + E) - \rho(A)| \leq \chi(A + E) \|E_{12}\| \|E_{21}\|$ .  $\square$

## E Proof of Theorem 5.1 and its Corollary

The main idea of this proof is to diagonalize  $A$  and write the open-loop system dynamics using the basis formed by the eigenvectors of  $A$ . Then, we provide an explicit expression for  $\hat{\Pi}_1$  and  $\Pi_1$ , based on which we can bound the error. To further derive a bound for  $\|\hat{P}_1 - P_1\|$ , one only needs to notice that norms are preserved under orthonormal coordinate transformations, so it only suffices to find a specific pair of bases of  $E_u^\perp$  and  $E_s$  that are close to each other — and the pair of bases formed by principle vectors (see Appendix A) is exactly what we want. This leads to Corollary 5.2 that is repeatedly used in subsequent proofs.

Without loss of generality, we shall write all matrices in the basis formed by unit eigenvectors  $\{w_1, \dots, w_n\}$  of  $A$ . Otherwise, let  $W = [w_1 \dots w_n]$ , and perform change-of-coordinate by setting  $\tilde{D} := W^{-1}DW$ ,  $\tilde{\Pi}_1 := W^{-1}\Pi_1W$ , which further gives

$$\tilde{\Pi}_1 = \tilde{D}(\tilde{D}^\top \tilde{D})^{-1} \tilde{D}^\top = (W^{-1}DW)(W^{-1}D^\top DW)^{-1}(W^{-1}D^\top W) = W^{-1}\hat{\Pi}_1W.$$

Note that  $\|W^{-1}\hat{\Pi}_1W - W^{-1}\Pi_1W\| \leq \|W\| \|W^{-1}\| \|\hat{\Pi}_1 - \Pi_1\|$ , where the upper bound is only magnified by a constant factor of  $\kappa_d(A) = \|W\| \|W^{-1}\|$  that is completely determined by  $A$ . Therefore, it is largely equivalent to consider  $(\tilde{D}, \tilde{\Pi}_1, \tilde{\hat{\Pi}}_1)$  instead of  $(D, \Pi_1, \hat{\Pi}_1)$ .

Note that the matrix  $D = [x_{t_0+1} \dots x_{t_0+k}]$  can be written as

$$D = \begin{bmatrix} d_1 & \lambda_1 d_1 & \dots & \lambda_1^{k-1} d_1 \\ d_2 & \lambda_2 d_2 & \dots & \lambda_2^{k-1} d_2 \\ \vdots & \vdots & \ddots & \vdots \\ d_n & \lambda_n d_n & \dots & \lambda_n^{k-1} d_n \end{bmatrix},$$

where  $x_{t_0+1} = [d_1, \dots, d_n]^\top$ . We first present a lemma characterizing some well-known properties of Vandermonde matrices that we need in the proof.

699 **Lemma E.1.** Given a Vandermonde matrix in variables  $x_1, \dots, x_n$  of order  $n$

$$V := V_n(x_1, \dots, x_n) = \begin{bmatrix} 1 & 1 & \dots & 1 \\ x_1 & x_2 & \dots & x_n \\ \vdots & \vdots & \ddots & \vdots \\ x_1^{n-1} & x_2^{n-1} & \dots & x_n^{n-1} \end{bmatrix},$$

700 its determinant is given by

$$\det(V) = \sum_{\pi} (-1)^{\text{sgn}(\pi)} x_{\pi(i_1)}^0 x_{\pi(i_2)}^1 \dots x_{\pi(i_n)}^{n-1} = \prod_{j < \ell} (x_\ell - x_j), \quad (8)$$

701 and its  $(u, v)$ -cofactor is given by

$$\text{cof}_{u,v}(V) = \begin{vmatrix} 1 & \dots & 1 & 1 & \dots & 1 \\ \vdots & \ddots & \vdots & \vdots & \ddots & \vdots \\ x_1^{u-2} & \dots & x_{v-1}^{u-2} & x_{v+1}^{u-2} & \dots & x_n^{u-2} \\ x_1^u & \dots & x_{v-1}^u & x_{v+1}^u & \dots & x_n^u \\ \vdots & \ddots & \vdots & \vdots & \ddots & \vdots \\ x_1^{n-1} & \dots & x_{v-1}^{n-1} & x_{v+1}^{n-1} & \dots & x_n^{n-1} \end{vmatrix} = \sigma_{u,v} \prod_{j < \ell \neq v} (x_\ell - x_j). \quad (9)$$

702 Here coefficients  $\sigma_{u,v}$  are given by  $\sigma_{u,v} := s_{n-u}(x_1, \dots, x_{v-1}, x_{v+1}, \dots, x_n)$ , where function  $s_m$   
703 is defined by  $s_m(y_1, \dots, y_n) := \sum_{i_1 < \dots < i_m} y_{i_1} \dots y_{i_m}$ .

704 *Proof of Lemma E.1.* The proof of (8) can be found in any standard linear algebra textbook, and that  
705 of (9) can be found in [54].  $\square$

706 It is evident that the entries in  $D$  display a similar pattern as those of a Vandermonde matrix. Based  
707 on this observation, we shall further derive the explicit form of  $\hat{H}_1$  as in the next lemma.

708 **Lemma E.2.** The projector  $\hat{H}_1 = D(D^\top D)^{-1} D^\top$  has explicit form

$$(\hat{H}_1)_{uv} = \frac{\sum_{\substack{i_2 < \dots < i_k \\ \forall j: i_j \neq u, v}} \alpha_{u, i_2, \dots, i_k} \alpha_{v, i_2, \dots, i_k}}{\sum_{i_1 < \dots < i_k} \alpha_{i_1, \dots, i_k}^2},$$

709 where the summand  $\alpha_{i_1, \dots, i_k}$  (with ordered subscript) is defined as

$$\alpha_{i_1, \dots, i_k} := \prod_j d_{i_j} \prod_{j < \ell} (\lambda_{i_\ell} - \lambda_{i_j}).$$

710 *Proof of Lemma E.2.* We start by deriving the explicit form of  $(D^\top D)^{-1}$ . Note that the determinant  
711 (which is also the denominator in the lemma) is given by

$$\begin{aligned} \det(D^\top D) &= \sum_{i_1, \dots, i_k} \begin{vmatrix} \lambda_{i_1}^0 d_{i_1}^2 & \lambda_{i_2}^1 d_{i_2}^2 & \dots & \lambda_{i_k}^{k-1} d_{i_k}^2 \\ \lambda_{i_1}^1 d_{i_1}^2 & \lambda_{i_2}^2 d_{i_2}^2 & \dots & \lambda_{i_k}^k d_{i_k}^2 \\ \vdots & \vdots & \ddots & \vdots \\ \lambda_{i_1}^{k-1} d_{i_1}^2 & \lambda_{i_2}^k d_{i_2}^2 & \dots & \lambda_{i_k}^{2k-2} d_{i_k}^2 \end{vmatrix} \\ &= \sum_{i_1, \dots, i_k} d_{i_1}^2 \dots d_{i_k}^2 \lambda_{i_1}^0 \lambda_{i_2}^1 \dots \lambda_{i_k}^{k-1} \prod_{j < \ell} (\lambda_{i_\ell} - \lambda_{i_j}) \\ &= \sum_{i_1 < \dots < i_k} d_{i_1}^2 \dots d_{i_k}^2 \prod_{j < \ell} (\lambda_{i_\ell} - \lambda_{i_j}) \sum_{\pi} (-1)^{\text{sgn}(\pi)} \lambda_{\pi(j_1)}^0 \lambda_{\pi(j_2)}^1 \dots \lambda_{\pi(j_k)}^{k-1} \\ &= \sum_{i_1 < \dots < i_k} d_{i_1}^2 \dots d_{i_k}^2 \prod_{j < \ell} (\lambda_{i_\ell} - \lambda_{i_j})^2 \\ &= \sum_{i_1 < \dots < i_k} \alpha_{i_1, \dots, i_k}^2, \end{aligned}$$

712 and the  $(u, v)$ -cofactor  $\text{cof}_{u,v}(D^\top D)$  is given by

$$\begin{aligned}
\text{cof}_{u,v}(D^\top D) &= (-1)^{u+v} \sum_{i_1, \dots, i_{k-1}} \begin{vmatrix} \lambda_{i_1}^0 d_{i_1}^2 & \cdots & \lambda_{i_{v-1}}^{v-2} d_{i_{v-1}}^2 & \lambda_{i_v}^v d_{i_v}^2 & \cdots & \lambda_{i_{k-1}}^{k-1} d_{i_{k-1}}^2 \\ \vdots & \ddots & \vdots & \vdots & \ddots & \vdots \\ \lambda_{i_1}^{u-2} d_{i_1}^2 & \cdots & \lambda_{i_{v-1}}^{u+v-4} d_{i_{v-1}}^2 & \lambda_{i_v}^{u+v-2} d_{i_v}^2 & \cdots & \lambda_{i_{k-1}}^{u+k-3} d_{i_{k-1}}^2 \\ \lambda_{i_1}^u d_{i_1}^2 & \cdots & \lambda_{i_{v-1}}^{u+v-2} d_{i_{v-1}}^2 & \lambda_{i_v}^{u+v} d_{i_v}^2 & \cdots & \lambda_{i_{k-1}}^{u+k-1} d_{i_{k-1}}^2 \\ \vdots & \ddots & \vdots & \vdots & \ddots & \vdots \\ \lambda_{i_1}^{k-1} d_{i_1}^2 & \cdots & \lambda_{i_{u+v-2}}^{k+v-3} d_{i_{v-1}}^2 & \lambda_{i_v}^{k+v-1} d_{i_v}^2 & \cdots & \lambda_{i_{k-1}}^{2k-2} d_{i_{k-1}}^2 \end{vmatrix} \\
&= (-1)^{u+v} \sum_{i_1, \dots, i_{k-1}} d_{i_1}^2 \cdots d_{i_{k-1}}^2 \lambda_{i_1}^0 \cdots \lambda_{i_{v-1}}^{v-2} \lambda_{i_v}^v \cdots \lambda_{i_{k-1}}^{k-1} s_{k-u} \prod_{j < \ell} (\lambda_{i_\ell} - \lambda_{i_j}) \\
&= (-1)^{u+v} \sum_{i_1 < \dots < i_{k-1}} s_{k-u} \cdot d_{i_1}^2 \cdots d_{i_{k-1}}^2 \prod_{j < \ell} (\lambda_{i_\ell} - \lambda_{i_j}) \cdot \\
&\quad \sum_{\pi} (-1)^{\text{sgn}(\pi)} \lambda_{\pi(i_1)}^0 \cdots \lambda_{\pi(i_{v-1})}^{v-2} \lambda_{\pi(i_v)}^v \cdots \lambda_{\pi(i_{k-1})}^{k-1} \\
&= (-1)^{u+v} \sum_{i_1 < \dots < i_{k-1}} s_{k-u} s_{k-v} \cdot d_{i_1}^2 \cdots d_{i_{k-1}}^2 \prod_{j < \ell} (\lambda_{i_\ell} - \lambda_{i_j})^2,
\end{aligned}$$

713 where  $s_{k-u}(\lambda_{i_1}, \dots, \lambda_{i_{k-1}})$  is abbreviated to  $s_{k-u}$ .

714 Note that symmetry of  $D^\top D$  guarantees  $\text{cof}_{v,u}(D^\top D) = \text{cof}_{u,v}(D^\top D)$ , so we have

$$(D^\top D)_{u,v}^{-1} = \frac{\text{cof}_{v,u}(D^\top D)}{\det(D^\top D)} = \frac{\text{cof}_{u,v}(D^\top D)}{\det(D^\top D)}.$$

715 And eventually we shall derive that

$$\begin{aligned}
\hat{P}_{u,v} &= \sum_{p,q} D_{u,p} (D^\top D)_{p,q}^{-1} D_{q,v}^\top \\
&= \frac{1}{\det(D^\top D)} \sum_{p,q} D_{u,p} D_{v,q} \text{cof}_{u,v}(D^\top D) \\
&= \frac{1}{\det(D^\top D)} \sum_{p,q} \lambda_u^{p-1} d_u \lambda_v^{q-1} d_v \cdot (-1)^{p+q} \sum_{i_1 < \dots < i_{k-1}} s_{k-p} s_{k-q} \cdot d_{i_1}^2 \cdots d_{i_{k-1}}^2 \prod_{j < \ell} (\lambda_{i_\ell} - \lambda_{i_j})^2 \\
&= \frac{1}{\det(D^\top D)} \sum_{i_1 < \dots < i_{k-1}} d_u d_v d_{i_1}^2 \cdots d_{i_{k-1}}^2 \prod_{j < \ell} (\lambda_{i_\ell} - \lambda_{i_j})^2 \sum_{p=1}^k (-1)^p \lambda_u^{p-1} s_{k-p} \sum_{q=1}^k (-1)^q \lambda_v^{q-1} s_{k-q} \\
&= \frac{1}{\det(D^\top D)} \sum_{i_1 < \dots < i_{k-1}} d_u d_{i_1} \cdots d_{i_{k-1}} \prod_{j < \ell} (\lambda_{i_\ell} - \lambda_{i_j}) \prod_{\ell} (\lambda_{i_\ell} - \lambda_u) \cdot \\
&\quad d_v d_{i_1} \cdots d_{i_{k-1}} \prod_{j < \ell} (\lambda_{i_\ell} - \lambda_{i_j}) \prod_{\ell} (\lambda_{i_\ell} - \lambda_v) \\
&= \frac{1}{\det(D^\top D)} \sum_{\substack{i_2 < \dots < i_k \\ \forall j: i_j \neq u, v}} \alpha_{u, i_2, \dots, i_k} \alpha_{v, i_2, \dots, i_k},
\end{aligned}$$

716 which is in exact the same form as stated in the lemma.  $\square$

717 Now we shall go back to the proof of the main result of this section.

718 *Proof of Theorem 5.1.* Recall that  $d_i = \lambda_i^{t_0+1} x_{0,i}$ . For the clarity of notations, let

$$\theta_{i_1, i_2, \dots, i_k} := \frac{\alpha_{i_1, i_2, \dots, i_k}}{\alpha_{1, 2, \dots, k}},$$

719 and it is evident that  $|\theta_{i_1, i_2, \dots, i_k}| = 1$  only if  $(i_1, i_2, \dots, i_k)$  is a permutation of  $(1, 2, \dots, k)$ . For  
 720 any other  $(i_1, i_2, \dots, i_k)$ , by the definition in Lemma E.2 we have

$$|\theta_{i_1, i_2, \dots, i_k}| \leq c_{i_1, i_2, \dots, i_k} \cdot r^{\sum_j \mathbf{1}_{i_j > k} t_0} \leq c \cdot r^{t_0},$$

721 where  $r = \frac{|\lambda_{k+1}|}{|\lambda_k|}$  and  $c := \max_{i_1, \dots, i_k} \{c_{i_1, i_2, \dots, i_k}\}$ . Therefore, since there are  $\binom{n}{k}$  different  $k$ -tuples  
 722  $(i_1, \dots, i_k)$  such that  $i_1 < \dots < i_k$ , we have

$$\sum_{i_1 < \dots < i_k} \theta_{i_1, \dots, i_k}^2 - \theta_{1, \dots, k}^2 < c \binom{n}{k} r^{2t_0}.$$

723 Now we can bound the entries in  $\hat{\Pi}_1$ . For any  $\varepsilon > 0$ , we shall select  $t_0$  such that  $c \binom{n}{k} r^{2t_0} < \frac{\varepsilon}{n^2}$ ,  
 724 where the denominator is always bounded by

$$1 \leq \sum_{i_1 < \dots < i_k} \theta_{i_1, \dots, i_k}^2 \leq 1 + \frac{\varepsilon}{n^2}.$$

725 For the nominator, note that for each  $\delta$  there are fewer entries with exponent  $\delta$  in the nominator than  
 726 in the denominator, so we can bound the denominator as

$$\left| \sum_{\substack{i_2 < \dots < i_k \\ \forall j: i_j \neq u, v}} \theta_{u, i_2, \dots, i_k} \theta_{v, i_2, \dots, i_k} \right| \leq \begin{cases} c \binom{n}{k} r^{2t_0} + 1 & u = v \leq k \\ c \binom{n}{k} r^{2t_0} & \text{otherwise} \end{cases}.$$

727 Therefore, when  $u = v \leq k$ , we have  $\sum_{\substack{i_2 < \dots < i_k \\ \forall j: i_j \neq u}} \theta_{u, i_2, \dots, i_k}^2 \geq 1$ , which shows

$$\left. \begin{aligned} (\hat{\Pi}_1)_{uv} &\geq \left(1 + \frac{\varepsilon}{n^2}\right)^{-1} \geq 1 - \frac{\varepsilon}{n^2} \\ (\hat{\Pi}_1)_{uv} &\leq 1 + \frac{\varepsilon}{n^2} \end{aligned} \right\} \Rightarrow |(\hat{\Pi}_1)_{uv} - (\Pi_1)_{uv}| \leq \frac{\varepsilon}{n^2};$$

728 for all other cases, the nominator cannot sum over a permutation of  $(1, \dots, k)$ , which gives

$$|(\hat{\Pi}_1)_{uv} - (\Pi_1)_{uv}| = |(\hat{\Pi}_1)_{uv}| \leq \frac{\varepsilon}{n^2}.$$

729 Therefore, the overall estimation error is bounded by

$$\|\hat{\Pi}_1 - \Pi_1\| \leq \sum_{u, v} |(\hat{\Pi}_1)_{uv} - (\Pi_1)_{uv}| \leq \varepsilon.$$

730 Recall that the bound is subject to a change-of-basis transformation, and in the general scenario  
 731 where the eigenvectors of  $A$  are not mutually orthogonal, the original prediction error bound should  
 732 be multiplied by  $\kappa_d(A)$ . Therefore, to achieve error threshold  $\varepsilon$  for predictions on  $\Pi_i$ , it is required  
 733 that  $c \binom{n}{k} r^{2t_0} < \frac{\varepsilon}{\kappa_d(A) n^2}$ , or equivalently, by *Stirling's Formula*,

$$t_0 > \frac{\log \kappa_d(A) + \log \frac{cn^2}{\varepsilon} + \log \binom{n}{k}}{2 \log \frac{1}{r}} = O \left( \frac{k \log n - \log \varepsilon + \log \kappa_d(A)}{2 \log \frac{|\lambda_k|}{|\lambda_{k+1}|}} \right). \quad (10)$$

734 This completes the proof.  $\square$

735 *Proof of Corollary 5.2.* We first construct a specific pair of orthonormal bases  $(P_1^*, \hat{P}_1^*)$  that satisfy  
 736 the corollary. To start with, take an arbitrary initial pair of orthonormal basis  $(P_1^\circ, \hat{P}_1^\circ)$ , and consider  
 737 the SVD  $(P_1^\circ)^\top \hat{P}_1^\circ = U \Sigma V^\top$ , which is equivalent to  $(P_1^\circ U)^\top (\hat{P}_1^\circ V) = \Sigma$ . Note that the columns  
 738 of  $P_1^\circ U = [w_1 \dots w_k]$  and  $\hat{P}_1^\circ V = [\hat{w}_1 \dots \hat{w}_k]$  form orthonormal bases of  $\text{col}(\Pi_1)$  and  $\text{col}(\hat{\Pi}_1)$ ,  
 739 respectively; furthermore, these bases project onto each other accordingly by subscripts, namely

$$\Pi_1 \hat{w}_i = \sigma_i w_i, \quad \hat{\Pi}_1 w_i = \sigma_i \hat{w}_i.$$

740 Now we set  $P_1^* := P_1^\circ U$  and  $\hat{P}_1^* := \hat{P}_1^\circ V$ . Note that

$$|1 - \sigma_i| = \|(\hat{\Pi}_1 - \Pi_1) \hat{w}_i\| < \varepsilon,$$

741 which shows, by properties of projection matrix  $\Pi_1$ ,

$$\|w_i - \hat{w}_i\| = \sqrt{\|w_i - \Pi_1 \hat{w}_i\|^2 + \|\Pi_1 \hat{w}_i - \hat{w}_i\|^2} = \sqrt{|1 - \sigma_i|^2 + \|(\hat{\Pi}_1 - \Pi_1) \hat{w}_i\|^2} < \sqrt{2}\varepsilon,$$

742 and thus

$$\|P_1^* - \hat{P}_1^*\| = \max_{\|z\|=1} \|(P_1^* - \hat{P}_1^*)z\| = \max_{\|z\|=1} \left\| \sum_i z_i (w_i - \hat{w}_i) \right\| \leq \sqrt{k} \cdot \sqrt{2}\varepsilon.$$

743 To further generalize the proposition to any arbitrary  $\hat{P}_1$ , we only have to note that there exists an  
 744 orthonormal matrix  $T$  that maps the basis  $\hat{P}_1^*$  to  $\hat{P}_1 = \hat{P}_1^* T$ . Now take  $P_1 = P_1^* T$ , and we have

$$\|\hat{P}_1 - P_1\| = \|(\hat{P}_1^* - P_1^*)T\| = \|\hat{P}_1^* - P_1^*\| < \sqrt{2k}\varepsilon.$$

745 As for the estimation error bound for  $M_1$ , we can directly write

$$\begin{aligned} \|P_1^\top A P_1 - \hat{P}_1^\top A \hat{P}_1\| &\leq \|P_1^\top A P_1 - P_1^\top A \hat{P}_1\| + \|P_1^\top A \hat{P}_1 - \hat{P}_1^\top A \hat{P}_1\| \\ &\leq \|A\| \|P_1 - \hat{P}_1\| + \|A\| \|P_1 - \hat{P}_1\| \\ &< 2\|A\|\delta, \end{aligned}$$

746 This completes the proof of the corollary.  $\square$

747 Recall that we are allowed to take any orthonormal basis  $P_1$  for  $E_u$ . Hence we shall always assume  
 748 by default that  $P_1$  in the proofs are selected as shown in the proof above.

749 We finish this section with simple but frequently-used bounds on  $\|\hat{P}_1^\top P_1\|$  and  $\|\hat{P}_1^\top P_2\|$ . These  
 750 factors represent an additional error introduced by using the inaccurate projector  $\hat{P}_1$ .

751 **Proposition E.1.** *Under the premises of Corollary 5.2,  $\|I_k - \hat{P}_1^\top P_1\| < \delta$ ,  $\|\hat{P}_1^\top P_2\| < \delta$ .*

752 *Proof.* Note that  $P_1^\top P_1 = I_k$  and  $P_1^\top P_2 = O$ , it is evident that

$$\begin{aligned} \|I_k - \hat{P}_1^\top P_1\| &= \|(P_1 - \hat{P}_1)^\top P_1\| < \delta, \\ \|\hat{P}_1^\top P_2\| &= \|(\hat{P}_1 - P_1)^\top P_2\| = \|\hat{P}_1 - P_1\| < \delta. \end{aligned}$$

753 This finishes the proof.  $\square$

## 754 F Proof of Theorem 4.2

755 We first consider a warm-up case where  $A$  is symmetric, which provides some intuition for the  
 756 general case. In this case, the eigenvectors of  $A$  are mutually orthogonal, which guarantees  $E_u^\perp = E_s$   
 757 (i.e., they are 0-close to each other) and thus  $\Delta = \mathbf{0}$ . This allows us to select  $\tau = 1$ ,  $\omega = 0$  and  
 758  $\alpha = 1$ , and the closed-loop dynamical matrix simplifies to

$$\hat{L}_1 = \begin{bmatrix} M_1 + P_1^\top B \hat{K}_1 \hat{P}_1^\top P_1 & P_1^\top B \hat{K}_1 \hat{P}_1^\top P_2 \\ P_2^\top B \hat{K}_1 \hat{P}_1^\top P_1 & M_2 + P_2^\top B \hat{K}_1 \hat{P}_1^\top P_2 \end{bmatrix}. \quad (11)$$

759 The norm of the top-left block is in the order of  $O(\delta)$  based on the estimation error bound (see  
 760 Theorem F.1)  $\|\hat{B}_1 - B_1\| = O(\sqrt{k}\delta)$ , which characterizes how well the controller can eliminate the  
 761 unstable component. The spectrum of the bottom-right block can be viewed as a perturbation (note  
 762 that  $\|\hat{P}_1^\top P_2\| = O(\delta)$  is small by Proposition E.1) to a stable matrix  $M_2$  (recall  $\rho(M_2) = |\lambda_{k+1}|$ ),  
 763 which should also be stable as long as  $\delta$  is small enough. Meanwhile, the top-right block is also  
 764 approximately zero, since only projection error contributes to the top-right block (again  $\|\hat{P}_1^\top P_2\| =$   
 765  $O(\delta)$ ). The above observations together show that  $\hat{L}_1$  is in the order of

$$\hat{L}_1 = \begin{bmatrix} O(\delta) & O(\delta) \\ O(1) & |\lambda_{k+1}| + O(\delta) \end{bmatrix}, \quad (12)$$

766 which is almost lower-triangular. Therefore, we can apply the block perturbation bound to bound  
 767 the spectrum of  $\hat{L}_1$ .

768 We start by showing the estimation error bound for  $B_1$ , which is straight-forward since  $\Delta = \mathbf{0}$ . Note  
 769 that the upper bound of the norm of our controller  $\hat{K}_1$  appears as a natural corollary of it.

770 **Proposition F.1.** *Under the premises of Theorem 4.2,  $\|\hat{B}_1 - B_1\| < 4\|A\|\sqrt{k}\delta$ .*

771 *Proof.* Note that the column vector  $b_i$  has estimation error bound

$$\begin{aligned} \|b_i - \hat{b}_i\| &= \frac{1}{\|x_{t_i}\|} \left\| (P_1^\top x_{t_{i+1}} - M_1 P_1^\top x_{t_i}) - (\hat{P}_1^\top x_{t_{i+1}} - \hat{M}_1 \hat{P}_1^\top x_{t_i}) \right\| \\ &\leq \frac{1}{\|x_{t_i}\|} \left( \|(P_1^\top - \hat{P}_1^\top) A x_{t_i}\| + \|(M_1 P_1^\top - \hat{M}_1 \hat{P}_1^\top) x_{t_i}\| \right) \\ &\leq \|P_1^\top - \hat{P}_1^\top\| \|A\| + \|M_1 P_1^\top - \hat{M}_1 \hat{P}_1^\top\| + \|M_1 \hat{P}_1^\top - \hat{M}_1 \hat{P}_1^\top\| \\ &< \|A\| \delta + \|M_1\| \|P_1^\top - \hat{P}_1^\top\| + \|M_1 - \hat{M}_1\| \\ &< \|A\| \delta + \|A\| \delta + 2\|A\| \delta = 4\|A\| \delta, \end{aligned}$$

772 where we repeatedly apply Corollary 5.2 and the fact that  $\|M_1\| \leq \|A\|$ . Then, to bound the error  
773 of the whole matrix, we simply apply the definition

$$\|\hat{B}_1 - B_1\| = \max_{\|u\|=1} \|(\hat{B}_1 - B_1)u\| \leq \max_{\|u\|=1} \sum_{i=1}^k |u_i| \|\hat{b}_i - b_i\| < 4\|A\|\sqrt{k}\delta.$$

774 This completes the proof. □

775 **Corollary F.1.** *Under the premises of Theorem 4.2, when (13) holds,  $\|\hat{K}_1\| < \frac{2\|A\|}{c\|B\|}$ .*

776 *Proof.* By Proposition F.1, it is evident that

$$\sigma_{\min}(\hat{B}_1) \geq \sigma_{\min}(B_1) - \|\hat{B}_1 - B_1\| > (c - 4\|A\|\sqrt{k}\delta)\|B\| > \frac{c}{2}\|B\|,$$

777 where the last inequality requires

$$\delta < \frac{c}{8\|A\|\sqrt{k}}. \quad (13)$$

778 Recall that  $\hat{K}_1 = \hat{B}_1^{-1} \hat{M}_1$ , and note that  $\|\hat{B}_1^{-1}\| \leq \frac{1}{\sigma_{\min}(\hat{B}_1)}$ , so we have

$$\|\hat{K}_1\| = \|\hat{B}_1^{-1} \hat{M}_1\| \leq \frac{\|\hat{P}_1^\top A \hat{P}_1\|}{\sigma_{\min}(\hat{B}_1)} < \frac{2\|A\|}{c\|B\|}.$$

779 This completes the proof. □

780 Recall that to apply Lemma 5.3, we need a bound on the spectral radii of diagonal blocks. The  
781 top-left block has already been eliminated to approximately  $\mathbf{0}$  by the design of  $\hat{K}_1$ , but the bottom-  
782 right block needs some extra work — although  $M_2$  is known to be stable, the inaccurate projection  
783 introduces an extra error that perturbs the spectrum. To bound the perturbed spectral radius, we will  
784 apply the following perturbation bound known as Bauer-Fike Theorem.

785 **Lemma F.2** (Bauer-Fike). *Suppose  $A \in \mathbb{R}^{n \times n}$  is diagonalizable, then for any  $E \in \mathbb{R}^{n \times n}$ , we have*

$$|\rho(A) - \rho(A + E)| \leq \max_{\hat{\lambda} \in \lambda(A+E)} \min_{\lambda \in \lambda(A)} |\lambda - \hat{\lambda}| \leq \kappa_d(A) \|E\|,$$

786 where  $\kappa_d(A)$  is the condition number of the matrix consisting of  $A$ 's eigenvectors as columns (i.e.,  
787 if  $A = SAS^{-1}$  with diagonal  $\Lambda$ , then  $\kappa_d(A) = \text{cond}(S)$ ), and  $\lambda(A)$  denotes the spectrum of  $A$ .

788 *Proof.* The proof is well-known and can be found in, e.g., [55]. □

789 Now we are ready to prove the main theorem for any symmetric dynamical matrix  $A$ .

790 *Proof of Theorem 4.2.* With  $\tau = 1$ , the controlled dynamics under estimated controller  $\hat{K}_1$  becomes

$$\hat{L}_1 = \begin{bmatrix} M_1 + P_1^\top B \hat{K}_1 \hat{P}_1^\top P_1 & P_1^\top B \hat{K}_1 \hat{P}_1^\top P_2 \\ P_2^\top B \hat{K}_1 \hat{P}_1^\top P_1 & M_2 + P_2^\top B \hat{K}_1 \hat{P}_1^\top P_2 \end{bmatrix}.$$



791 We first guarantee that the diagonal blocks are stable. For the top-left block,

$$\begin{aligned}
\|M_1 + P_1^\top B \hat{K}_1\| &= \|M_1 - B_1 \hat{B}_1^{-1} \hat{M}_1 \hat{P}_1^\top P_1\| \\
&\leq \|M_1 - \hat{M}_1\| + \|\hat{M}_1 - B_1 \hat{B}_1^{-1} \hat{M}_1\| + \|B_1 \hat{B}_1^{-1} \hat{M}_1 (I_k - \hat{P}_1^\top P_1)\| \\
&\leq \|M_1 - \hat{M}_1\| + \|\hat{B}_1 - B_1\| \|\hat{K}_1\| + \|B\| \|\hat{K}_1\| \|I_k - \hat{P}_1^\top P_1\| \\
&< 2\|A\|\delta + \frac{8\|A\|^2 \sqrt{k}}{c\|B\|} \delta + \frac{2\|A\|}{c} \delta \\
&= \frac{2(4\sqrt{k}\|A\| + (c+1)\|B\|)\|A\|}{c\|B\|} \delta,
\end{aligned} \tag{14}$$

792 where in (14) we apply Corollary 5.2, Corollary F.1, and Proposition E.1. Meanwhile, for the  
793 bottom-right block, note that the norm of the error term is bounded by

$$\|P_2^\top B \hat{K}_1 \hat{P}_1^\top P_2\| \leq \|B\| \|\hat{B}_1^{-1}\| \|\hat{M}_1\| \|\hat{P}_1^\top P_2\| \leq \frac{2\|A\|}{c} \delta.$$

794 Hence, by Lemma F.2, the spectral radius of the bottom-right block is bounded by

$$\rho(M_2 + P_2^\top B \hat{K}_1 \hat{P}_1^\top P_2) \leq \rho(M_2) + \frac{2}{c} \kappa_d(M_2) \|A\| \delta < 1,$$

795 where we require (recall that  $\rho(M_2) = |\lambda_{k+1}|$ )

$$\delta < \frac{c(1 - |\lambda_{k+1}|)}{2\kappa_d(M_2)\|A\|}. \tag{15}$$

796 To apply the lemma, it only suffices to bound the spectral norms of off-diagonal blocks. Note that  
797 the top-right block is bounded by

$$\|P_1^\top B \hat{K}_1 \hat{P}_1^\top P_2\| \leq \|B\| \|\hat{K}_1\| \|\hat{P}_1^\top P_2\| < \frac{2\|A\|}{c} \delta,$$

798 and the bottom-left block is bounded by

$$\|P_2^\top B \hat{K}_1 \hat{P}_1^\top P_1\| \leq \|B\| \|\hat{K}_1\| \leq \frac{2\|A\|}{c}.$$

799 Now, by Lemma 5.3, we can guarantee that

$$\rho(\hat{L}_1) \leq \max \left\{ \frac{2(4\sqrt{k}\|A\| + 2(c+1)\|B\|)\|A\|}{c\|B\|} \delta, |\lambda_{k+1}| + \|B\| \|\hat{K}_1\| \delta \right\} + \frac{4\|A\|^2 \chi(\hat{L}_1)}{c^2} \delta < 1,$$

800 where we require

$$\delta < \min \left\{ \frac{1}{\frac{2(4\sqrt{k}\|A\| + 2(c+1)\|B\|)\|A\|}{c\|B\|} + \frac{4\|A\|^2 \chi(\hat{L}_1)}{c^2}}, \frac{1 - |\lambda_{k+1}|}{\frac{2\|A\|}{c} + \frac{4\|A\|^2 \chi(\hat{L}_1)}{c^2}} \right\}. \tag{16}$$

801 So far, it is still left to recollect all the constraints we need on  $\delta$  (see (13), (15) and (16)), i.e.,

$$\delta < \min \left\{ \frac{c}{8\|A\|\sqrt{k}}, \frac{c(1 - |\lambda_{k+1}|)}{2\kappa_d(M_2)\|A\|}, \frac{1 - |\lambda_{k+1}|}{\frac{2\|A\|}{c} + \frac{4\|A\|^2 \chi(\hat{L}_1)}{c^2}}, \frac{1}{\frac{2(4\sqrt{k}\|A\| + 2(c+1)\|B\|)\|A\|}{c\|B\|} + \frac{4\|A\|^2 \chi(\hat{L}_1)}{c^2}} \right\},$$

802 which can be simplified (but weakened) to

$$\delta < \frac{c^2(1 - |\lambda_{k+1}|)}{16\sqrt{k}\kappa_d(M_2)\|A\|(\|A\| + \|B\|)\chi(\hat{L}_1)} = O(k^{-1/2}). \tag{17}$$

803 We shall rewrite the bound equivalently in terms of  $t_0$  (recall (10) in Appendix E) as

$$t_0 > \frac{\log(cn^2 \binom{n}{k}) - \log \frac{c^2(1 - |\lambda_{k+1}|)}{16\sqrt{k}\kappa_d(M_2)\|A\|(\|A\| + \|B\|)\chi(\hat{L}_1)}}{2 \log \frac{|\lambda_k|}{|\lambda_{k+1}|}} = O \left( \frac{k \log n}{\log \frac{|\lambda_k|}{|\lambda_{k+1}|}} \right), \tag{18}$$

804 since  $\kappa_d(A) = 1$ . This completes the proof of Theorem 4.2.  $\square$

## G Proof of the Main Theorem

For the general case, the analysis becomes more challenging for two reasons: on the one hand, we have to apply  $\tau$ -hop control with  $\tau$  possibly larger than 1, which potentially increases the norm of  $B_\tau$  and  $\hat{K}_1$ ; on the other hand, the top-right corner will no longer be  $O(\delta)$  with a non-zero  $\Delta$  (in fact,  $\Delta_\tau$  is in the order of  $|\lambda_1|^\tau$  that grows exponentially with respect to  $\tau$ ). To settle these issues, we first introduce two key observations on bounds of major factors:

- (1) For an arbitrary matrix  $X$ , although  $\|X\|$  might be significantly larger than  $\rho(X)$ , we always have  $\|X^t\| = O(\rho(X)^t)$  when  $t$  is large enough. This is formally proven as Gelfand's Formula (see Lemma G.1), and helps to establish bounds like  $\|M_1\| = O(|\lambda_1|^\tau)$ ,  $\|M_2\| = O(|\lambda_{k+1}|^\tau)$ ,  $\|\Delta_\tau\| = O(|\lambda_1|^\tau)$ ,  $\|P_2^\top A^{\tau-1}\| = O(|\lambda_{k+1}|^\tau)$ , and  $\|\hat{M}_1^\tau - M_1^\tau\| = O(|\lambda_1|^\tau \delta)$ .
- (2) When the system runs with 0 control inputs for a long period (specifically, for  $\omega$  time steps), eventually we will see the unstable component expanding and the stable component shrinking, and consequently  $\frac{\|P_2^\top A^\omega x\|}{\|A^\omega x\|} = O(|\lambda_k|^{-\omega})$ . This cancels out the exponentially exploding  $\|\Delta_\tau\|$ , and helps to establish the estimation bound  $\|\hat{B}_\tau - B_\tau\| = O(|\lambda_1|^\tau \delta)$ .

With these in hand, we are ready to upper bound the norms of the blocks in  $\hat{L}_\tau$ :

- (1) *The top-left and bottom-right blocks:* similar to the warm-up case, only to note that dynamical matrices are lifted to their  $\tau^{\text{th}}$  power, and thus  $\|\hat{B}_\tau - B_\tau\|$  carries an additional factor of  $|\lambda_1|^\tau$ .
- (2) *The bottom-left block:*  $P_2^\top A^{\tau-1}$  contributes an  $O(|\lambda_{k+1}|^\tau)$  factor that decays exponentially, while  $\hat{K}_1$  contributes an  $O(|\lambda_1|^\tau)$  factor that explodes exponentially. The overall bound is in the order of  $O(|\lambda_1 \lambda_{k+1} / \lambda_k|^\tau)$ , and decays with respect to  $\tau$  if  $|\lambda_1 \lambda_{k+1}| < 1$ .
- (3) *The top-right block:* the first term is in the order of  $O(|\lambda_1|^\tau)$ , and the second term is in the order of  $O(|\lambda_1 \lambda_{k+1} / \lambda_k|^\tau \delta)$ . This block is in the order of  $O(|\lambda_1|^\tau)$  when  $\delta$  is small enough.

Therefore, the closed-loop dynamical matrix is actually in the order of

$$\hat{L}_\tau = \begin{bmatrix} O(|\lambda_1|^{2\tau} \delta) & O(|\lambda_1|^\tau + |\lambda_1 \lambda_{k+1} / \lambda_k|^\tau \delta) \\ O(|\lambda_1 \lambda_{k+1} / \lambda_k|^\tau) & O(|\lambda_{k+1}|^\tau + |\lambda_1 \lambda_{k+1}|^\tau \delta) \end{bmatrix}. \quad (19)$$

Finally, by Lemma 5.3, asymptotic stability is guaranteed when  $|\lambda_1|^2 |\lambda_{k+1}| < |\lambda_k|$  (i.e., the norm of the bottom-left block decays faster than the norm of the top-right block grows), in which case we can set  $\tau$  to be some constant determined by  $A$  and  $B$ , and  $\delta$  in the order of  $O(|\lambda_1|^{-2\tau})$ .

Technically, we would like to bound the spectral radius of the matrix

$$\hat{L}_\tau = \begin{bmatrix} M_1^\tau + P_1^\top A^{\tau-1} B \hat{K}_1 \hat{P}_1^\top P_1 & \Delta_\tau + P_1^\top A^{\tau-1} B \hat{K}_1 \hat{P}_1^\top P_2 \\ P_2^\top A^{\tau-1} B \hat{K}_1 \hat{P}_1^\top P_1 & M_2^\tau + P_2^\top A^{\tau-1} B \hat{K}_1 \hat{P}_1^\top P_2 \end{bmatrix}$$

using Lemma 5.3. The proof is split into two major building blocks: on the one hand, we introduce the well-known Gelfand's Formula to bound matrices appearing with exponents; on the other hand, we establish the estimation error bound for  $B_\tau$  (parallel to Lemma F.1) and proceed to bound  $\|\hat{K}_1\|$ , for which we rely on the instability results shown in Section G.2. Finally, a combination of these building blocks naturally establishes the main theorem.

### G.1 Gelfand's Formula

In this section, we will show norm bounds for factors that contain matrix exponents. It is natural to apply the well-known Gelfand's formula as stated below.

**Lemma G.1** (Gelfand's formula). *For any square matrix  $X$ , we have*

$$\rho(X) = \lim_{t \rightarrow \infty} \|X^t\|^{1/t}. \quad (20)$$

*In other words, for any  $\varepsilon > 0$ , there exists a constant  $\zeta_\varepsilon(X)$  such that*

$$\sigma_{\max}(X^t) = \|X^t\| \leq \zeta_\varepsilon(X) (\rho(X) + \varepsilon)^t. \quad (21)$$

*Further, if  $X$  is invertible, let  $\lambda_{\min}(X)$  denote the eigenvalue of  $X$  with minimum modulus, then*

$$\sigma_{\min}(X^t) \geq \frac{1}{\zeta_\varepsilon(X^{-1})} \left( \frac{|\lambda_{\min}(X)|}{1 + \varepsilon |\lambda_{\min}(X)|} \right)^t. \quad (22)$$

843 *Proof.* The proof of (20) can be easily found in existing literature (e.g., [56], Corollary 5.6.14), and  
 844 (21) follows by the definition of limits. For (22), note that

$$\sigma_{\min}(X^t) = \frac{1}{\sigma_{\max}((X^{-1})^t)} \geq \frac{1}{\zeta_{\varepsilon}(X^{-1})(\rho(X^{-1}) + \varepsilon)^t} = \frac{1}{\zeta_{\varepsilon}(X^{-1})} \left( \frac{|\lambda_{\min}(X)|}{1 + \varepsilon|\lambda_{\min}(X)|} \right)^t,$$

845 where we apply  $\sigma_{\min}(X^t) = \sigma_{\max}((X^{-1})^t)^{-1}$  and  $\rho(X^{-1}) = |\lambda_{\min}(X)|^{-1}$ .  $\square$

846 It is evident that  $\rho(A) = \rho(M_1) = \rho(N_1) = |\lambda_1|$ ,  $\lambda_{\min}(M_1) = \lambda_{\min}(N_1) = |\lambda_k|$  and  $\rho(M_2) =$   
 847  $\rho(N_2) = |\lambda_{k+1}|$  (recall that  $M_1$  and  $M_2$  inherits the unstable and stable eigenvalues, respectively).  
 848 Therefore, we can use Gelfand's formula to bound the relevant factors appearing in  $\hat{L}_{\tau}$ .

849 **Proposition G.1.** *Under the premises of Theorem 4.1, the following results hold for any  $t \in \mathbb{N}$ :*

- 850 (1)  $\|B_t\| \leq \zeta_{\varepsilon_1}(A)(|\lambda_1| + \varepsilon_1)^{t-1}\|B\|$ ;  
 851 (2)  $\|P_2^{\top} A^t\| \leq \zeta_{\varepsilon_2}(M_2)(|\lambda_{k+1}| + \varepsilon_2)^t$ ;  
 852 (3)  $\|\Delta_t\| \leq C_{\Delta}(|\lambda_1| + \varepsilon_1)^t$ , where  $C_{\Delta} = \zeta_{\varepsilon_1}(M_1)\zeta_{\varepsilon_2}(M_2)\frac{(2-\xi)\sqrt{2\xi}\|A\|}{1-\xi}\frac{2|\lambda_{k+1}|}{|\lambda_1|+\varepsilon_1-|\lambda_{k+1}|-\varepsilon_2}$ .  
 853 Here (and below)  $\varepsilon_1$  and  $\varepsilon_2$  are selected to be sufficiently small constants (see (47)).

854 *Proof.* (1) This is a direct corollary of Gelfand's Formula, since

$$\|B_t\| = \|P_1^{\top} A^{t-1} B\| \leq \|A^{t-1}\| \|B\| \leq \zeta_{\varepsilon_1}(A)(|\lambda_1| + \varepsilon_1)^{t-1}\|B\|.$$

855 (2) It only suffices to recall  $\rho(M_2) = |\lambda_{k+1}|$ , and note that

$$P_2^{\top} A^t = P_2^{\top} P M^t P^{-1} = [0 \ I_{n-k}] M^t P^{\top} = M_2^t P_2^{\top}.$$

856 Hence by Gelfand's formula we have  $\|P_2^{\top} A^t\| = \|M_2^t\| \leq \zeta_{\varepsilon_2}(M_2)(|\lambda_{k+1}| + \varepsilon_2)^t$ .

857 (3) This is a direct corollary of Lemma A.1(4) and Gelfand's formula, since

$$\begin{aligned} \|\Delta_t\| &= \left\| \sum_i M_1^i \Delta M_2^{t-1-i} \right\| \leq \|\Delta\| \sum_i \|M_1^i\| \|M_2^{t-1-i}\| \\ &\leq \zeta_{\varepsilon_1}(M_1)\zeta_{\varepsilon_2}(M_2)\frac{(2-\xi)\sqrt{2\xi}\|A\|}{1-\xi} \sum_i (\varepsilon_1 + |\lambda_1|)^i (|\lambda_{k+1}| + \varepsilon_2)^{t-1-i} \\ &= C_{\Delta}(|\lambda_1| + \varepsilon_1)^t. \end{aligned}$$

858 This finishes the proof of the proposition.  $\square$

859 **Proposition G.2.** *Under the premises of Theorem 4.1,*

$$\|\hat{M}_1^{\tau} - M_1^{\tau}\| < 2\tau\|A\|\zeta_{\varepsilon_1}(A)^2(|\lambda_1| + \varepsilon_1)^{\tau-1}\delta.$$

860 *Proof.* Recall that Corollary 5.2 gives  $\|M_1 - \hat{M}_1\| < 2\|A\|\delta$ . Meanwhile, by Gelfand's Formula,

$$\begin{aligned} \|M_1^t\| &= \|P^{\top} A^t P\| \leq \|A^t\| \leq \zeta_{\varepsilon_1}(A)(|\lambda_1| + \varepsilon_1)^t, \\ \|\hat{M}_1^t\| &= \|\hat{P}^{\top} A^t \hat{P}\| \leq \|A^t\| \leq \zeta_{\varepsilon_1}(A)(|\lambda_1| + \varepsilon_1)^t. \end{aligned}$$

861 Then we have the following bound by telescoping

$$\begin{aligned} \|M_1^{\tau} - \hat{M}_1^{\tau}\| &= \left\| \sum_{i=1}^{\tau} (M_1^i \hat{M}_1^{\tau-i} - M_1^{i-1} \hat{M}_1^{\tau-i+1}) \right\| \\ &\leq \sum_{i=1}^{\tau} \|M_1^{i-1}\| \|\hat{M}_1^{\tau-i}\| \|M_1 - \hat{M}_1\| \\ &< \tau \cdot \zeta_{\varepsilon_1}(A)^2(|\lambda_1| + \varepsilon_1)^{\tau-1} \cdot 2\|A\|\delta \\ &= 2\tau\|A\|\zeta_{\varepsilon_1}(A)^2(|\lambda_1| + \varepsilon_1)^{\tau-1}\delta. \end{aligned}$$

862 This finishes the proof.  $\square$

863 **Corollary G.2.** *Under the premises of Theorem 4.1, when  $\delta < \frac{1}{\tau}$ ,*

$$\|\hat{M}_1^\tau\| < (\zeta_{\varepsilon_1}(M_1)(|\lambda_1| + \varepsilon_1) + 2\|A\|\zeta_{\varepsilon_1}(A))(|\lambda_1| + \varepsilon_1)^{\tau-1}.$$

864 *Proof.* A combination of Gelfand's Formula and Proposition G.2 yields

$$\begin{aligned} \|\hat{M}_1^\tau\| &\leq \|M_1^\tau\| + \|\hat{M}_1^\tau - M_1^\tau\| \\ &\leq \zeta_{\varepsilon_1}(M_1)(|\lambda_1| + \varepsilon_1)^\tau + 2\tau\|A\|\zeta_{\varepsilon_1}(A)^2(|\lambda_1| + \varepsilon_1)^{\tau-1}\delta \\ &< (\zeta_{\varepsilon_1}(M_1)(|\lambda_1| + \varepsilon_1) + 2\tau\|A\|\zeta_{\varepsilon_1}(A)\delta)(|\lambda_1| + \varepsilon_1)^{\tau-1}, \end{aligned}$$

865 where the last inequality requires  $\delta < \frac{1}{\tau}$ . This completes the proof.  $\square$

## 866 G.2 Instability of the Unstable Component

867 We have been referring to  $E_s$  (and approximately,  $E_u^\perp$ ) as “stable”, and  $E_u$  as “unstable”. This leads  
868 us to think that the unstable component will constitute an increasing proportion of the state as the  
869 system evolves with zero control input. However, in some cases it might happen that the proportion  
870 of unstable component does not increase within the first few time steps, although eventually it will  
871 explode. This motivates us to formally characterize such instability of the unstable component.

872 In this section, we aim to establish a fundamental property of  $A^\omega$  (for large enough  $\omega$ , of course)  
873 that it “almost surely” increases the norm of the state. By “almost surely” we mean that the initial  
874 state should have non-negligible unstable component, which happens with probability  $1 - \varepsilon$  when  
875 we uniformly sample the initial state from the surface of unit hyper-sphere in  $\mathbb{R}^n$ .

876 Throughout this section, we use  $\gamma$  to denote the ratio of the unstable component over the stable  
877 component within some state  $x$  (i.e.,  $\frac{\|R_1x\|}{\|R_2x\|}$ ). Note that

$$x = \Pi_u x + \Pi_s x = Q_1 R_1 x + Q_2 R_2 x,$$

878 where  $Q_1, Q_2$  are orthonormal. Hence

$$\|R_1x\| - \|R_2x\| \leq \|x\| \leq \|R_1x\| + \|R_2x\|.$$

879 As a consequence, when  $\frac{\|R_1x\|}{\|R_2x\|} > \gamma > 1$ , we also know that

$$\frac{\|R_1x\|}{\|x\|} \geq \frac{\|R_1x\|}{\|R_1x\| + \|R_2x\|} > \frac{\gamma}{\gamma + 1}, \quad \frac{\|R_2x\|}{\|x\|} \leq \frac{\|R_2x\|}{\|R_1x\| - \|R_2x\|} < \frac{1}{\gamma - 1}.$$

880 The following results are presented to fit in the framework of an inductive proof. We first establish  
881 the inductive step, where Proposition G.3 shows that the unstable component eventually becomes  
882 dominant with a non-negligible initial  $\gamma$ , and Proposition G.4 shows that the unstable component will  
883 still constitute a non-negligible part after a control input of mild magnitude is injected. Meanwhile,  
884 Proposition G.5 shows that the initial unstable component is non-negligible with large probability.

885 **Proposition G.3.** *Given a dynamical matrix  $A$  and some constant  $\gamma > 0$ , for any state  $x$  such that*  
886  *$\frac{\|R_1x\|}{\|R_2x\|} > \gamma$ , for any  $\omega \in \mathbb{N}$ , we have*

$$\frac{\|R_1A^\omega x\|}{\|R_2A^\omega x\|} > \gamma_\omega := C_\gamma \left( \frac{|\lambda_k|}{(1 + \varepsilon_3|\lambda_k|)(|\lambda_{k+1}| + \varepsilon_2)} \right)^\omega,$$

887 where  $C_\gamma := \frac{1}{(1 + \frac{1}{\gamma})\zeta_{\varepsilon_3}(N_1^{-1})\zeta_{\varepsilon_2}(N_2)\|R_2\|}$  is a constant related to  $\gamma$ . Specifically, for any  $\gamma_+ > 0$ ,

888 there exists a constant  $\omega_0(\gamma, \gamma_+) = O(\log \frac{\gamma_+}{\gamma})$ , such that for any  $\omega > \omega_0(\gamma, \gamma_+)$ ,  $\frac{\|R_1x\|}{\|R_2x\|} > \gamma_+$ .

889 *Proof.* Recall that  $R_1A^\omega = N_1^\omega R_1$  and  $R_2A^\omega = N_2^\omega R_2$ . By Gelfand's Formula we have

$$\begin{aligned} \frac{\|R_1A^\omega x\|}{\|R_2A^\omega x\|} &= \frac{\|N_1^\omega R_1x\|}{\|N_2^\omega R_2x\|} \geq \frac{\sigma_{\min}(N_1^\omega)\|R_1x\|}{\|N_2^\omega\|\|R_2\|\|x\|} > \frac{\sigma_{\min}(N_1^\omega)}{(1 + \frac{1}{\gamma})\|N_2^\omega\|\|R_2\|} \\ &\geq \frac{(|\lambda_k|/(1 + \varepsilon_3|\lambda_k|))^\omega}{(1 + \frac{1}{\gamma})\zeta_{\varepsilon_3}(N_1^{-1})\zeta_{\varepsilon_2}(N_2)(|\lambda_{k+1}| + \varepsilon_2)^\omega\|R_2\|} \end{aligned}$$

$$= \frac{1}{(1 + \frac{1}{\gamma})\zeta_{\varepsilon_3}(N_1^{-1})\zeta_{\varepsilon_2}(N_2)\|R_2\|} \left( \frac{|\lambda_k|}{(1 + \varepsilon_3|\lambda_k|)(|\lambda_{k+1}| + \varepsilon_2)} \right)^\omega.$$

Therefore, we shall take

$$\omega_0(\gamma, \gamma_+) = \frac{\log \gamma_+ / C_\gamma}{\log(|\lambda_k|) / ((1 + \varepsilon_3|\lambda_k|)(|\lambda_{k+1}| + \varepsilon_2))} = O\left(\log \frac{\gamma_+}{\gamma}\right),$$

and the proof is completed.  $\square$

**Corollary G.3.** Under the premises of Proposition G.3, for any  $\omega > \omega_0(\gamma, \gamma_+)$ ,

$$\frac{\|P_1^\top A^\omega x\|}{\|A^\omega x\|} > 1 - \frac{2}{\gamma_\omega - 1}, \quad \frac{\|P_2^\top A^\omega x\|}{\|A^\omega x\|} < \frac{1}{\gamma_\omega - 1}.$$

*Proof.* Note that we have decomposition  $x = \Pi_u x + \Pi_1 \Pi_s x + \Pi_2 \Pi_s x$ , where  $\|\Pi_u x\| = \|R_1 x\|$  and  $\|\Pi_s x\| = \|R_2 x\|$ . Hence, for any  $\omega > \omega_0(\gamma, \gamma_+)$ , we can show that

$$\begin{aligned} \frac{\|P_1^\top A^\omega x\|}{\|A^\omega x\|} &= \frac{\|\Pi_u A^\omega x + \Pi_1 \Pi_s A^\omega x\|}{\|A^\omega x\|} \\ &\geq \frac{\|\Pi_u A^\omega x\| - \|\Pi_1 \Pi_s A^\omega x\|}{\|A^\omega x\|} \\ &\geq \frac{\|R_1 A^\omega x\| - \|R_2 A^\omega x\|}{\|A^\omega x\|} \\ &> \frac{\gamma_\omega}{\gamma_\omega + 1} - \frac{1}{\gamma_\omega - 1} > 1 - \frac{2}{\gamma_\omega - 1}, \end{aligned}$$

and similarly,

$$\frac{\|P_2^\top A^\omega x\|}{\|A^\omega x\|} = \frac{\|\Pi_2 \Pi_s A^\omega x\|}{\|A^\omega x\|} \leq \frac{\|\Pi_s A^\omega x\|}{\|A^\omega x\|} < \frac{1}{\gamma_\omega - 1}.$$

The proof is completed.  $\square$

**Proposition G.4.** Given dynamical matrices  $A, B$  and constants  $\gamma > 0, \gamma_+ > 1$ , for any state  $x$  such that  $\frac{\|R_1 x\|}{\|R_2 x\|} > \gamma_+$ , suppose we feed a control input  $\|u\| \leq \alpha \|x\|$  and observe the next state  $x' = Ax + Bu$ , where  $\alpha$  satisfies

$$\alpha < \frac{\frac{\gamma_+}{\gamma_+ + 1} \sigma_{\min}(M_1) - \frac{\gamma}{\gamma_+ - 1} \frac{1}{1 - \xi} \|A\|}{(1 + \frac{\sqrt{2\xi}}{1 - \xi} + \frac{\gamma}{1 - \xi}) \|B\|}. \quad (23)$$

Then we can guarantee that  $\frac{\|R_1 x'\|}{\|R_2 x'\|} > \gamma$ .

*Proof.* The proposition can be shown by direct calculation. Let  $z = Rx = [z_1^\top, z_2^\top]^\top$ . Recall that

$$Rx' = z' = \begin{bmatrix} N_1 z_1 + R_1 B u \\ N_2 z_2 + R_2 B u \end{bmatrix},$$

and note that  $\frac{\|z_1\|}{\|x\|} > \frac{\gamma_+}{\gamma_+ + 1}$ ,  $\frac{\|z_2\|}{\|x\|} < \frac{1}{\gamma_+ - 1}$  under the assumptions, so we have

$$\begin{aligned} \frac{\|R_1 x'\|}{\|R_2 x'\|} &= \frac{\|N_1 z_1 + R_1 B u\|}{\|N_2 z_2 + R_2 B u\|} \geq \frac{\|N_1 z_1\| - \|R_1 B u\|}{\|N_2 z_2\| + \|R_2 B u\|} \\ &\geq \frac{\sigma_{\min}(N_1) \|z_1\| - \|R_1 B\| \|u\|}{\|N_2\| \|z_2\| + \|R_2 B\| \|u\|} \\ &\geq \frac{\sigma_{\min}(N_1) \frac{\gamma_+}{\gamma_+ + 1} \|x\| - \alpha \|R_1\| \|B\| \|x\|}{\|N_2\| \frac{1}{\gamma_+ - 1} \|x\| + \alpha \|R_2\| \|B\| \|x\|} \\ &\geq \frac{\sigma_{\min}(M_1) \frac{\gamma_+}{\gamma_+ + 1} \|x\| - \alpha (1 + \frac{\sqrt{2\xi}}{1 - \xi}) \|B\| \|x\|}{\frac{1}{1 - \xi} \|A\| \frac{1}{\gamma_+ - 1} \|x\| + \alpha \frac{1}{1 - \xi} \|B\| \|x\|} \\ &> \gamma, \end{aligned}$$

where we apply Lemma A.1 and the convention of taking  $N_1 = M_1$ .  $\square$

904 **Proposition G.5.** Suppose a state  $x$  is sampled uniformly randomly from the unit hyper-sphere  
 905 surface  $\mathbb{B}_n \subset \mathbb{R}^n$ , then for any constant  $\gamma < \min \left\{ \frac{1}{2}, \frac{1}{\sqrt{2/(\sigma_{\min}(R_1)k)+1}} \right\}$ , we have

$$\Pr_{x \sim \mathcal{U}(\mathbb{B}_n)} \left[ \frac{\|R_1 x\|}{\|R_2 x\|} > \gamma \right] > 1 - \theta(\gamma),$$

906 where  $\theta(\gamma) = \frac{8\sqrt{2}}{B(\frac{1}{2}, \frac{n-1}{2})\sqrt{\sigma_{\min}(R_1)}}\gamma = O(\gamma)$  is a constant bounded linearly by  $\gamma$ .

907 *Proof.* Note that

$$\|R_1 x\| > \frac{\gamma}{1-\gamma}\|x\| \Rightarrow \|R_2 x\| < \|x\| + \|R_1 x\| < \frac{1}{1-\gamma}\|x\| \Rightarrow \frac{\|R_1 x\|}{\|R_2 x\|} > \gamma.$$

908 so we only have to show that  $\Pr_{x \sim \mathcal{U}(\mathbb{B}_n)} \left[ \frac{\|R_1 x\|}{\|R_2 x\|} \leq \frac{\gamma}{1-\gamma} \right] < \theta(\gamma)$ . Now let  $R_1^\top R_1 = S^\top D S$  be the  
 909 eigen-decomposition of  $R_1^\top R_1$ , where  $S$  is selected to be orthonormal such that

$$D = \text{diag}(d_1, \dots, d_k, 0, \dots, 0).$$

910 Note that the vector  $y = Sx =: [y_1, \dots, y_n]$  also obeys a uniform distribution over  $\mathbb{B}_n$ , so we have

$$\begin{aligned} \Pr \left[ \|R_1 x\| \leq \frac{\gamma}{1-\gamma} \|x\| \right] &= \Pr \left[ x^\top R_1^\top R_1 x \leq \left( \frac{\gamma}{1-\gamma} \right)^2 \right] = \Pr \left[ y^\top D y \leq \left( \frac{\gamma}{1-\gamma} \right)^2 \right] \\ &\leq \Pr \left[ d_i y_i^2 \leq \frac{1}{k} \left( \frac{\gamma}{1-\gamma} \right)^2, \forall i = 1, \dots, k \right] \\ &\leq \sum_{i=1}^k \Pr \left[ y_i^2 \leq \frac{1}{d_i k} \left( \frac{\gamma}{1-\gamma} \right)^2 \right]. \end{aligned}$$

911 It suffices to bound the probability  $\Pr_{y \sim \mathcal{U}(B)} [y_i^2 \leq \eta]$ . Note that  $y$  can be obtained by first sampling  
 912 a Gaussian random vector  $z \sim \mathcal{N}(0, I_n)$ , and then normalize it to get  $y = \frac{z}{\|z\|}$ . Hence

$$\Pr_{y \sim \mathcal{U}(\mathbb{B}_n)} [y_i^2 \leq \eta] = \Pr_{z \sim \mathcal{N}(0, I_n)} [z_i^2 \leq \eta \|z\|^2] = \Pr_{z \sim \mathcal{N}(0, I_n)} \left[ \frac{z_i^2}{\sum_{j \neq i} z_j^2} \leq \frac{\eta}{1-\eta} \right],$$

913 where  $w := \frac{z_i^2}{\sum_{j \neq i} z_j^2}$  is known to obey an F-distribution  $w \sim \mathcal{F}(1, n-1)$ . The c.d.f. of  $w$  is known  
 914 to be  $I_{w/(w+n-1)}(\frac{1}{2}, \frac{n-1}{2})$ , where  $I$  denotes the *regularized incomplete Beta function*. Note that

$$I_{w/(w+n-1)} \left( \frac{1}{2}, \frac{n-1}{2} \right) = \frac{2w^{1/2}}{(n-1)^{1/2} B(\frac{1}{2}, \frac{n-1}{2})} - \frac{nw^{3/2}}{3(n-1)^{3/2} B(\frac{1}{2}, \frac{n-1}{2})} + O(n^{5/2}),$$

915 it can be shown that  $I_{w/(w+n-1)}(\frac{1}{2}, \frac{n-1}{2}) < \frac{4\sqrt{w}}{\sqrt{n-1} B(\frac{1}{2}, \frac{n-1}{2})}$ . Hence

$$\Pr_{y \sim \mathcal{U}(\mathbb{B}_n)} [y_i^2 \leq \eta] = \Pr_{z \sim \mathcal{N}(0, I_n)} \left[ \frac{z_i^2}{\sum_{j \neq i} z_j^2} \leq \frac{\eta}{1-\eta} \right] < \frac{4\sqrt{\frac{\eta}{1-\eta}}}{\sqrt{n-1} B(\frac{1}{2}, \frac{n-1}{2})},$$

916 which further gives

$$\Pr \left[ \|R_1 x\| \leq \frac{\gamma}{1-\gamma} \|x\| \right] < \sum_{i=1}^k \frac{4\sqrt{\frac{2}{d_i k} \left( \frac{\gamma}{1-\gamma} \right)^2}}{\sqrt{n-1} B(\frac{1}{2}, \frac{n-1}{2})} < \frac{8\sqrt{2}}{B(\frac{1}{2}, \frac{n-1}{2})\sqrt{\sigma_{\min}(R_1)}}\gamma = O(\gamma)$$

917 where we require  $\gamma < \min \left\{ \frac{1}{2}, \frac{1}{\sqrt{2/(\sigma_{\min}(R_1)k)+1}} \right\}$ . □

918 Combining the previous three propositions, we have shown in an inductive way that the algorithm  
 919 guarantees  $\frac{\|P_2^\top x_{t_i}\|}{\|x_{t_i}\|}$  is constantly upper bounded at each time step  $t_i$  ( $i = 1, \dots, k$ ), which is critical  
 920 to the estimation error bound of  $B_\tau$ . This is concluded as the following lemma.

921 **Lemma G.4.** *Under the premises of Theorem 4.1, for any constants  $\omega, \gamma$  such that  $\omega < t_0$  and*  
 922  *$\gamma < \min \left\{ \frac{1}{2}, \frac{1}{\sqrt{2/(\sigma_{\min}(R_1)k)+1}} \right\}$ , the algorithm guarantees*

$$\frac{\|P_2^\top x_{t_i}\|}{\|x_{t_i}\|} < \frac{1}{\gamma_\omega - 1}, \quad \forall i = 1, \dots, k$$

923 *with probability  $1 - \theta(\gamma)$  over the initialization of  $x_0$  on the unit hyper-sphere surface  $\mathbb{B}_n$ , where*

$$\gamma_\omega := C_\gamma \left( \frac{|\lambda_k|}{(1 + \varepsilon_3 |\lambda_k|)(|\lambda_{k+1}| + \varepsilon_2)} \right)^\omega.$$

924 *Proof.* We proceed by showing that  $\frac{\|R_1 x_{t_i}\|}{\|R_2 x_{t_i}\|} > \gamma_\omega$  for  $i = 1, \dots, k$  in an inductive way.

925 For the base case, it is guaranteed by Proposition G.5 that  $x_0$  satisfies  $\frac{\|R_1 x_0\|}{\|R_2 x_0\|} > \gamma$  with probability  
 926  $1 - \theta(\gamma)$ , and Proposition G.3 further guarantees  $\frac{\|R_1 x_{t_1}\|}{\|R_2 x_{t_1}\|} > \gamma_\omega$ . Here we require  $t_0 > \omega$ .

927 For the inductive step, suppose we have shown  $\frac{\|R_1 x_{t_i}\|}{\|R_2 x_{t_i}\|} > \gamma_\omega$ . Since  $\|u_{t_i}\| = \alpha \|x_{t_i}\|$ , we have  
 928  $\frac{\|R_1 x_{t_i+1}\|}{\|R_2 x_{t_i+1}\|} > \gamma$  by Proposition G.4, and again Proposition G.3 guarantees  $\frac{\|R_1 x_{t_{i+1}}\|}{\|R_2 x_{t_{i+1}}\|} > \gamma_\omega$ .

929 Now it only suffices to apply Corollary G.3 to complete the proof.  $\square$

### 930 G.3 Estimation Error of $B_\tau$

931 **Proposition G.6.** *Under the premises of Theorem 4.1 and Lemma G.4, when (29) holds,*

$$\|\hat{B}_\tau - B_\tau\| < C_B(|\lambda_1| + \varepsilon_1)^{\tau-1} \delta,$$

932 *where  $C_B := \frac{2\sqrt{k}\zeta_{\varepsilon_1}(A)^2((2\tau+2)\|A\| + \|B\|)}{\alpha}$ .*

933 *Proof.* This is parallel to Lemma F.1. Note that we have to subtract an additional term (induced by  
 934 non-zero  $\Delta_\tau$  in  $M^\tau$ ) to calculate the actual  $b_i$ , so we have

$$\begin{aligned} \|b_i - \hat{b}_i\| &= \frac{1}{\alpha \|x_{t_i}\|} \left\| (P_1^\top x_{t_i+\tau} - M_1^\tau P_1^\top x_{t_i} - \Delta_\tau P_2^\top x_{t_i}) - (\hat{P}_1^\top x_{t_i+\tau} - \hat{M}_1^\tau \hat{P}_1^\top x_{t_i}) \right\| \\ &\leq \frac{1}{\alpha \|x_{t_i}\|} \left( \|(P_1 - \hat{P}_1)^\top (A^\tau x_{t_i} + B_\tau u_{t_i})\| + \|M_1^\tau P_1^\top x_{t_i} - \hat{M}_1^\tau \hat{P}_1^\top x_{t_i}\| + \|\Delta_\tau P_2^\top x_{t_i}\| \right) \\ &< \frac{1}{\alpha} (\zeta_{\varepsilon_1}(A)^2(|\lambda_1| + \varepsilon_1)^{\tau-1}((2\tau+2)\|A\| + \|B\|)\delta + \delta). \end{aligned}$$

935 Here the first term is bounded by

$$\begin{aligned} \|(P_1 - \hat{P}_1)^\top (A^\tau x_{t_i} + B_\tau u_{t_i})\| &\leq \|P_1 - \hat{P}_1\|(\|A^\tau\| + \|A^{\tau-1}B\|)\|x_{t_i}\| \\ &< \|x_{t_i}\|\zeta_{\varepsilon_1}(A)(|\lambda_1| + \varepsilon_1)^{\tau-1}(\|A\| + \|B\|)\delta, \end{aligned}$$

936 where in the last inequality we apply Corollary 5.2; the second term is bounded by

$$\begin{aligned} \|M_1^\tau P_1^\top x_{t_i} - \hat{M}_1^\tau \hat{P}_1^\top x_{t_i}\| &\leq (\|M_1^\tau (P_1^\top - \hat{P}_1^\top)\| + \|(M_1^\tau - \hat{M}_1^\tau) \hat{P}_1^\top\|)\|x_{t_i}\| \\ &< (\zeta_{\varepsilon_1}(A)(|\lambda_1| + \varepsilon_1)^{\tau-1}\|A\|\delta \\ &\quad + 2\tau\|A\|\zeta_{\varepsilon_1}(A)^2(|\lambda_1| + \varepsilon_1)^{\tau-1}\delta)\|x_{t_i}\| \end{aligned} \quad (24)$$

$$\leq \|x_{t_i}\|\zeta_{\varepsilon_1}(A)^2(|\lambda_1| + \varepsilon_1)^{\tau-1}(2\tau+1)\|A\|\delta, \quad (25)$$

937 where in (24) we apply Proposition G.2, and in (25) we apply a simple fact that  $\zeta_{\varepsilon_1}(A) \geq 1$ ; the  
 938 third term is bounded by

$$\frac{\|\Delta_\tau\| \|P_2^\top x_{t_i}\|}{\|x_{t_i}\|} \leq \frac{C_\Delta(|\lambda_1| + \varepsilon_1)^\tau}{\left[ C_\gamma \left( \frac{|\lambda_k|}{(1+\varepsilon_3|\lambda_k|)(|\lambda_{k+1}|+\varepsilon_2)} \right)^\omega - 1 \right]} \quad (26)$$

$$< \frac{2C_\Delta(|\lambda_1| + \varepsilon_1)^\tau}{C_\gamma \left( \frac{|\lambda_k|}{(1+\varepsilon_3|\lambda_k|)(|\lambda_{k+1}|+\varepsilon_2)} \right)^\omega} \quad (27)$$

$$< \delta, \quad (28)$$

939 where in (26) we apply Lemma G.4, while in (27) and (28) we require

$$\omega > \max \left\{ \frac{\log 2/C_\gamma}{\log(|\lambda_k|/(1+\varepsilon_3|\lambda_k|)(|\lambda_{k+1}|+\varepsilon_2))}, \frac{\log(2C_\Delta)/(C_\gamma\delta) + \tau \log(|\lambda_1|+\varepsilon_1)}{\log(|\lambda_k|/(1+\varepsilon_3|\lambda_k|)(|\lambda_{k+1}|+\varepsilon_2))} \right\}. \quad (29)$$

940 Finally, to bound the error of the whole matrix, we simply apply the definition

$$\begin{aligned} \|\hat{B}_\tau - B_\tau\| &= \max_{\|u\|=1} \|(\hat{B}_\tau - B_\tau)u\| \leq \max_{\|u\|=1} \sum_{i=1}^k |u_i| \|\hat{b}_i - b_i\| \\ &< \frac{\sqrt{k}}{\alpha} (\zeta_{\varepsilon_1}(A)^2(|\lambda_1|+\varepsilon_1)^{\tau-1}((2\tau+2)\|A\|+\|B\|)+1) \delta \\ &< \frac{2\sqrt{k}\zeta_{\varepsilon_1}(A)^2((2\tau+2)\|A\|+\|B\|)}{\alpha} (|\lambda_1|+\varepsilon_1)^{\tau-1} \delta. \end{aligned}$$

941 This completes the proof.  $\square$

942 **Corollary G.5.** *Under the premises of Theorem 4.1 and Lemma G.4, when (29), (30) and (31) hold,*

$$\sigma_{\min}(\hat{B}_\tau) > \frac{c\|B\|}{4\zeta_{\varepsilon_3}(N_1^{-1})} \left( \frac{|\lambda_k|}{1+\varepsilon_3|\lambda_k|} \right)^{\tau-1}.$$

943 *Proof.* We apply the  $E_u \oplus E_s$ -decomposition. Note that

$$B_\tau = P_1^\top A^{\tau-1} B = P_1^\top (Q_1 N_1^{\tau-1} R_1 + Q_2 N_2^{\tau-1} R_2) B = N_1^{\tau-1} R_1 B + P_1^\top Q_2 N_2^{\tau-1} R_2 B,$$

944 so by Gelfand's Formula and Lemma A.1 we have

$$\begin{aligned} \sigma_{\min}(B_\tau) &= \sigma_{\min}(N_1^{\tau-1} R_1 B + P_1^\top Q_2 N_2^{\tau-1} R_2 B) \\ &\geq \sigma_{\min}(N_1^{\tau-1}) \sigma_{\min}(R_1 B) - \|P_1^\top Q_2\| \|N_2^{\tau-1}\| \|R_2\| \|B\| \\ &\geq \frac{c\|B\|}{\zeta_{\varepsilon_3}(N_1^{-1})} \left( \frac{|\lambda_k|}{1+\varepsilon_3|\lambda_k|} \right)^{\tau-1} - \frac{\sqrt{2\xi}\zeta_{\varepsilon_2}(N_2)\|B\|}{1-\xi} (|\lambda_{k+1}|+\varepsilon_2)^{\tau-1} \\ &> \frac{c\|B\|}{2\zeta_{\varepsilon_3}(N_1^{-1})} \left( \frac{|\lambda_k|}{1+\varepsilon_3|\lambda_k|} \right)^{\tau-1} \end{aligned}$$

945 where the last inequality requires

$$\frac{\sqrt{2\xi}\zeta_{\varepsilon_2}(N_2)\zeta_{\varepsilon_3}(N_1^{-1})}{c(1-\xi)} \left( \frac{(|\lambda_{k+1}|+\varepsilon_2)(1+\varepsilon_3|\lambda_k|)}{|\lambda_k|} \right)^{\tau-1} < \frac{1}{2},$$

946 or equivalently,

$$\tau > \frac{\log \frac{c(1-\xi)}{2\sqrt{2\xi}\zeta_{\varepsilon_2}(N_2)\zeta_{\varepsilon_3}(N_1^{-1})}}{\log \frac{(|\lambda_{k+1}|+\varepsilon_2)(1+\varepsilon_3|\lambda_k|)}{|\lambda_k|}} + 1. \quad (30)$$

947 Therefore, using Proposition G.6,  $\sigma_{\min}(\hat{B}_\tau)$  is lower bounded by

$$\begin{aligned} \sigma_{\min}(\hat{B}_\tau) &\geq \sigma_{\min}(B_\tau) - \|\hat{B}_\tau - B_\tau\| \\ &> \frac{c\|B\|}{2\zeta_{\varepsilon_3}(N_1^{-1})} \left( \frac{|\lambda_k|}{1+\varepsilon_3|\lambda_k|} \right)^{\tau-1} - C_B (|\lambda_1|+\varepsilon_1)^{\tau-1} \delta \\ &> \frac{c\|B\|}{4\zeta_{\varepsilon_3}(N_1^{-1})} \left( \frac{|\lambda_k|}{1+\varepsilon_3|\lambda_k|} \right)^{\tau-1}, \end{aligned}$$

948 where the last inequality requires

$$\delta < \frac{c\|B\|}{4\zeta_{\varepsilon_3}(N_1^{-1})C_B} \left( \frac{|\lambda_k|}{(1+\varepsilon_3|\lambda_k|)(|\lambda_1|+\varepsilon_1)} \right)^{\tau-1}. \quad (31)$$

949 This completes the proof.  $\square$



950 Finally, using the above bounds, we can easily upper bound the norm of our controller  $\hat{K}_1$ .

951 **Proposition G.7.** *Under the premises of Theorem 4.1, when (29), (30), (31) and  $\delta < \frac{1}{\tau}$  hold,*

$$\|\hat{K}_1\| < C_K \left( \frac{(|\lambda_1| + \varepsilon_1)(1 + \varepsilon_3|\lambda_k|)}{|\lambda_k|} \right)^{\tau-1},$$

952 where  $C_K := \frac{4\zeta_{\varepsilon_3}(N_1^{-1})(\zeta_{\varepsilon_1}(M_1)(|\lambda_1| + \varepsilon_1) + 2\|A\|\zeta_{\varepsilon_1}(A))}{c\|B\|}$ .

953 *Proof.* Recall that the controller is constructed as  $\hat{K}_1 = \hat{B}_\tau^{-1} \hat{M}_1^\tau \hat{P}_1^\top$ , so we have

$$\|\hat{K}_1\| \leq \|\hat{B}_\tau^{-1}\| \|\hat{M}_1^\tau\| = \frac{\|\hat{M}_1^\tau\|}{\sigma_{\min}(\hat{B}_\tau)},$$

954 and the bound is merely a combination of Corollary G.2 and Corollary G.5 whenever  $\delta < \frac{1}{\tau}$ .  $\square$

#### 955 G.4 Proof of Theorem 4.1

956 Now we are ready to combine the above building blocks and present the complete proof of Theorem  
957 4.1. Note that, with all the bounds established above, the proof structure parallels that of Theorem  
958 4.2, the special case with a symmetric dynamical matrix  $A$ .

959 *Proof of Theorem 4.1.* The proof is again based on Lemma 5.3. We first guarantee that the diagonal  
960 blocks are stable. For the top-left block,

$$\begin{aligned} \|M_1^\tau + P_1^\top A^{\tau-1} B \hat{K}_1\| &= \|M_1^\tau - B_\tau \hat{B}_\tau^{-1} \hat{M}_1^\tau \hat{P}_1^\top P_1\| \\ &\leq \|M_1^\tau - \hat{M}_1^\tau\| + \|(B_\tau - \hat{B}_\tau) \hat{B}_\tau^{-1} \hat{M}_1^\tau\| + \|B_\tau \hat{B}_\tau^{-1} \hat{M}_1^\tau (I - \hat{P}_1^\top P_1)\| \\ &\leq \|M_1^\tau - \hat{M}_1^\tau\| + \|B_\tau - \hat{B}_\tau\| \|\hat{K}_1\| + \|B_\tau\| \|\hat{K}_1\| \|I - \hat{P}_1^\top P_1\| \\ &\leq 2\tau \|A\| \zeta_{\varepsilon_1}(A)^2 (|\lambda_1| + \varepsilon_1)^{\tau-1} \delta \\ &\quad + C_B C_K \left( \frac{(|\lambda_1| + \varepsilon_1)^2 (1 + \varepsilon_3 |\lambda_k|)}{|\lambda_k|} \right)^{\tau-1} \delta \end{aligned} \quad (32)$$

$$\begin{aligned} &\quad + \zeta_{\varepsilon_1}(A) \|B\| C_K \left( \frac{(|\lambda_1| + \varepsilon_1)^2 (1 + \varepsilon_3 |\lambda_k|)}{|\lambda_k|} \right)^{\tau-1} \delta \\ &< (C_B C_K + \zeta_{\varepsilon_1}(A) \|B\| C_K + 1) \left( \frac{(|\lambda_1| + \varepsilon_1)^2 (1 + \varepsilon_3 |\lambda_k|)}{|\lambda_k|} \right)^{\tau-1} \delta \end{aligned} \quad (33)$$

$$< \frac{1}{2}, \quad (34)$$

961 where in (32) we apply Propositions G.2, G.6, G.7, and E.1; in (33) we require

$$\frac{1}{\tau} \left( \frac{(|\lambda_1| + \varepsilon_1)^2 (1 + \varepsilon_3 |\lambda_k|)}{|\lambda_k|} \right)^{\tau-1} > 2 \|A\| \zeta_{\varepsilon_1}(A)^2; \quad (35)$$

962 and in (34) we require

$$\delta < \frac{1}{2(C_B C_K + \zeta_{\varepsilon_1}(A) \|B\| C_K + 1)} \left( \frac{(|\lambda_1| + \varepsilon_1)^2 (1 + \varepsilon_3 |\lambda_k|)}{|\lambda_k|} \right)^{-(\tau-1)}. \quad (36)$$

963 For the bottom-right block, it is straight-forward to see that

$$\begin{aligned} \|M_2^\tau + P_2^\top A^{\tau-1} B \hat{K}_1 \hat{P}_1^\top P_2\| &\leq \|M_2^\tau\| + \|P_2^\top A^{\tau-1}\| \|B\| \|\hat{K}_1\| \|\hat{P}_1^\top P_2\| \\ &\leq \zeta_{\varepsilon_2}(M_2) (|\lambda_{k+1}| + \varepsilon_2)^\tau \\ &\quad + \zeta_{\varepsilon_2}(M_2) \|B\| C_K \left( \frac{(|\lambda_1| + \varepsilon_1)(|\lambda_{k+1}| + \varepsilon_2)(1 + \varepsilon_3 |\lambda_k|)}{|\lambda_k|} \right)^{\tau-1} \delta \\ &< 1 \end{aligned}$$

964 where the last inequality requires

$$\tau > \frac{\log 1/(4\zeta_{\varepsilon_2}(M_2))}{\log(|\lambda_{k+1}| + \varepsilon_2)}, \quad (37)$$

$$\delta < \frac{1}{4\zeta_{\varepsilon_2}(M_2)\|B\|C_K} \left( \frac{(|\lambda_1| + \varepsilon_1)(|\lambda_{k+1}| + \varepsilon_2)(1 + \varepsilon_3|\lambda_k|)}{|\lambda_k|} \right)^{-(\tau-1)}. \quad (38)$$

965 Now it only suffices to bound the spectral norms of off-diagonal blocks. Note that, by applying  
966 Proposition G.7 and Proposition G.1, the top-right block is bounded as

$$\begin{aligned} \|\Delta_\tau + P_1^\top A^{\tau-1} B \hat{K}_1 \hat{P}_1^\top P_2\| &\leq \|\Delta_\tau\| + \|B_\tau\| \|\hat{K}_1\| \|\hat{P}_1^\top P_2\| \\ &< C_\Delta (|\lambda_1| + \varepsilon_1)^\tau \\ &\quad + \zeta_{\varepsilon_1}(A) \|B\| C_K \left( \frac{(|\lambda_1| + \varepsilon_1)^2 (1 + \varepsilon_3|\lambda_k|)}{|\lambda_k|} \right)^{\tau-1} \delta \\ &< (C_\Delta + 1) (|\lambda_1| + \varepsilon_1)^\tau \end{aligned}$$

967 where the last inequality requires

$$\delta < \frac{(|\lambda_1| + \varepsilon_1)^2}{\zeta_{\varepsilon_1}(A) \|B\| C_K} \left( \frac{(|\lambda_1| + \varepsilon_1)^2 (1 + \varepsilon_3|\lambda_k|)}{|\lambda_k|} \right)^{-\tau}; \quad (39)$$

968 and the bottom-left block is bounded as

$$\begin{aligned} \|P_2^\top A^{\tau-1} B \hat{K}_1 \hat{P}_1^\top P_1\| &\leq \|P_2^\top A^{\tau-1}\| \|B\| \|\hat{K}_1\| \\ &< \zeta_{\varepsilon_2}(M_2) \|B\| C_K \left( \frac{(|\lambda_1| + \varepsilon_1)(|\lambda_{k+1}| + \varepsilon_2)(1 + \varepsilon_3|\lambda_k|)}{|\lambda_k|} \right)^{\tau-1}. \end{aligned}$$

969 Now, by Lemma 5.3, we can guarantee that

$$\rho(\hat{L}_\tau) \leq \frac{1}{2} + \chi(\hat{L}_\tau) \frac{(C_\Delta + 1)\zeta_{\varepsilon_2}(M_2)\|B\|C_K}{|\lambda_1| + \varepsilon_1} \left( \frac{(|\lambda_1| + \varepsilon_1)^2 (|\lambda_{k+1}| + \varepsilon_2)(1 + \varepsilon_3|\lambda_k|)}{|\lambda_k|} \right)^{\tau-1} < 1,$$

970 which requires

$$\tau > \frac{\log \frac{2(|\lambda_1| + \varepsilon_1)}{\chi(\hat{L}_\tau)(C_\Delta + 1)\zeta_{\varepsilon_2}(M_2)\|B\|C_K}}{\log \frac{(|\lambda_1| + \varepsilon_1)^2 (|\lambda_{k+1}| + \varepsilon_2)(1 + \varepsilon_3|\lambda_k|)}{|\lambda_k|}}. \quad (40)$$

971 Note that the above constraint makes sense only if  $|\lambda_1|^2 |\lambda_{k+1}| < |\lambda_k|$ .

972 So far, it is still left to recollect all the constraints we need on the parameters  $\tau, \alpha, \delta, \gamma$  and  $\omega$ . To  
973 start with, all constraints on  $\tau$  (see (30), (35), (37) and (40)) can be summarized as

$$\begin{aligned} \tau > \max \left\{ \frac{\log \frac{c(1-\xi)}{2\sqrt{2\xi}\zeta_{\varepsilon_2}(N_2)\zeta_{\varepsilon_3}(N_1^{-1})}}{\log \frac{(|\lambda_{k+1}| + \varepsilon_2)(1 + \varepsilon_3|\lambda_k|)}{|\lambda_k|}} + 1, \frac{\log 1/(4\zeta_{\varepsilon_2}(M_2))}{\log(|\lambda_{k+1}| + \varepsilon_2)}, \frac{\log \frac{2(|\lambda_1| + \varepsilon_1)}{\chi(\hat{L}_\tau)(C_\Delta + 1)\zeta_{\varepsilon_2}(M_2)\|B\|C_K}}{\log \frac{(|\lambda_1| + \varepsilon_1)^2 (|\lambda_{k+1}| + \varepsilon_2)(1 + \varepsilon_3|\lambda_k|)}{|\lambda_k|}}, \right. \\ \left. - \frac{1}{\log \frac{(|\lambda_1| + \varepsilon_1)^2 (1 + \varepsilon_3|\lambda_k|)}{|\lambda_k|}} W_{-1} \left( - \frac{\log \frac{(|\lambda_1| + \varepsilon_1)^2 (1 + \varepsilon_3|\lambda_k|)}{|\lambda_k|}}{2\|A\|\zeta_{\varepsilon_1}(A)^2 \frac{(|\lambda_1| + \varepsilon_1)^2 (1 + \varepsilon_3|\lambda_k|)}{|\lambda_k|}} \right) \right\}, \end{aligned}$$

974 where  $W_{-1}$  denotes the non-principle branch of the Lambert-W function. Here we utilize the fact  
975 that, for  $x > \frac{1}{\log a}$ ,  $y = \frac{a^x}{x}$  is monotone increasing with inverse function  $x = -\frac{1}{\log a} W_{-1} \left( -\frac{\log a}{y} \right)$ ,  
976 which can be upper bounded by Theorem 1 in [57] as

$$-\frac{1}{\log a} W_{-1} \left( -\frac{\log a}{y} \right) < \frac{\log y - \log \log a + \sqrt{2(\log y - \log \log a)}}{\log a} < \frac{3(\log y - \log \log a)}{\log a}.$$

977 By gathering different constants, we have

$$\tau > \frac{\log \frac{\sqrt{\xi}}{1-\xi} + \log \frac{1}{c} + \log \chi(\hat{L}_\tau) + 5 \log \bar{\zeta} + \log \frac{\|A\|}{|\lambda_1| - |\lambda_{k+1}|} + C_\tau}{\log \frac{|\lambda_k|}{|\lambda_1|^2 |\lambda_{k+1}|}} = O(1), \quad (41)$$

978 where we define  $\bar{\zeta} := \max\{\zeta_{\varepsilon_1}(A), \zeta_{\varepsilon_2}(M_2), \zeta_{\varepsilon_2}(N_2), \zeta_{\varepsilon_3}(N_1^{-1})\}$ , and  $C_\tau$  is a numerical constant.  
 979 Note that we have to guarantee the denominator to be positive, which gives rise to the additional  
 980 assumption  $|\lambda_1|^2|\lambda_{k+1}| < |\lambda_k|$ . Meanwhile, for any  $\ell \in \mathbb{N}$ , we shall select  $\gamma$  such that

$$\gamma = O(k^{-\ell}), \quad \gamma < \min \left\{ \frac{1}{2}, \frac{1}{\sqrt{2/(\sigma_{\min}(R_1)k) + 1}} \right\}, \quad (42)$$

981 and select  $\alpha$  such that (see (23), and we have already guaranteed  $\gamma_\omega > 2$  in (29))

$$\alpha < \frac{\frac{2}{3}\sigma_{\min}(M_1) - \frac{\gamma}{1-\xi}\|A\|}{(1 + \frac{\sqrt{2\xi}}{1-\xi} + \frac{\gamma}{1-\xi})\|B\|} = O(1). \quad (43)$$

982 Now constraints on  $\delta$  (see (31), (36), (38) and (39)) can be summarized as

$$\begin{aligned} \delta < \min \left\{ \frac{c\|B\|}{4\zeta_{\varepsilon_3}(N_1^{-1})C_B} \left( \frac{|\lambda_k|}{(1 + \varepsilon_3|\lambda_k|)(|\lambda_1| + \varepsilon_1)} \right)^{\tau-1}, \right. \\ & \quad \frac{1}{2(C_B C_K + \zeta_{\varepsilon_1}(A)\|B\|C_K + 1)} \left( \frac{(|\lambda_1| + \varepsilon_1)^2(1 + \varepsilon_3|\lambda_k|)}{|\lambda_k|} \right)^{-(\tau-1)}, \\ & \quad \frac{1}{4\zeta_{\varepsilon_2}(M_2)\|B\|C_K} \left( \frac{(|\lambda_1| + \varepsilon_1)(|\lambda_{k+1}| + \varepsilon_2)(1 + \varepsilon_3|\lambda_k|)}{|\lambda_k|} \right)^{-(\tau-1)}, \\ & \quad \left. \frac{(|\lambda_1| + \varepsilon_1)^2}{\zeta_{\varepsilon_1}(A)\|B\|C_K} \left( \frac{(|\lambda_1| + \varepsilon_1)^2(1 + \varepsilon_3|\lambda_k|)}{|\lambda_k|} \right)^{-\tau} \right\}, \end{aligned}$$

983 which can be simplified to ( $C_\delta$  is a constant collecting minor factors)

$$\delta < \frac{C_\delta \alpha c}{\sqrt{k}\bar{\zeta}^3(\|A\| + \|B\|)} |\lambda_1|^{-2\tau} = O(k^{-1/2}|\lambda_1|^{-2\tau}), \quad (44)$$

984 or we can rewrite the bound equivalently in terms of  $t_0$  (recall (10) in Appendix E) as

$$\begin{aligned} t_0 &> \frac{\log(n^2 \binom{n}{k}) + \log k + \log \kappa_d(A) + 2\tau \log |\lambda_1| + 3 \log \bar{\zeta} + \log(\|A\| + \|B\|) + \log \frac{\sqrt{2}}{C_\delta \alpha}}{2 \log \frac{|\lambda_k|}{|\lambda_{k+1}|}} \\ &= O \left( \frac{2\tau \log |\lambda_1| + k \log n + \log \kappa_d(A)}{\log \frac{|\lambda_k|}{|\lambda_{k+1}|}} \right), \end{aligned} \quad (45)$$

985 Finally, we select  $\omega$  such that (see (29), and note that  $C_\gamma = O(\gamma) = O(k^{-\ell})$ )

$$\omega > \max \left\{ \frac{\log \frac{2}{C_\gamma}}{\log \frac{|\lambda_k|}{(1 + \varepsilon_3|\lambda_k|)(|\lambda_{k+1}| + \varepsilon_2)}}, \frac{\log \frac{2C_A}{C_\gamma \delta} + \tau \log(|\lambda_1| + \varepsilon_1)}{\log \frac{|\lambda_k|}{(1 + \varepsilon_3|\lambda_k|)(|\lambda_{k+1}| + \varepsilon_2)}} \right\},$$

986 which can be reorganized as

$$\omega > \frac{\log \frac{1}{C_\gamma} + \log \frac{\sqrt{\xi}}{1-\xi} + 2 \log \bar{\zeta} + \log \frac{\|A\|}{|\lambda_1| - |\lambda_{k+1}|} + \log \frac{1}{\delta} + C_\omega}{\log \frac{|\lambda_k|}{|\lambda_{k+1}|}} = O(\ell \log k). \quad (46)$$

987 Note that here  $\varepsilon_1, \varepsilon_2, \varepsilon_3$  are taken to be small enough, so that

$$|\lambda_{k+1}| + \varepsilon_2 < 1, \quad |\lambda_1| + \varepsilon_1)^2(|\lambda_{k+1}| + \varepsilon_2) < \frac{|\lambda_k|}{1 + \varepsilon_3|\lambda_k|}, \quad \varepsilon_3|\lambda_k| < 1. \quad (47)$$

988 Also, the probability of sampling an admissible  $x_0$  is  $1 - \theta(\gamma) = 1 - O(k^{-\ell})$  by the union bound.

989 Finally, by (41), (45) and (46), we conclude that Algorithm 1 terminates within

$$t_0 + k(1 + \omega + \tau) > \frac{1}{2 \log \frac{|\lambda_k|}{|\lambda_{k+1}|}} \left( \underbrace{\log(n^2 \binom{n}{k})}_{O(k \log n)} + \underbrace{2k \log \frac{1}{C_\gamma} + \log k}_{O(k \log k)} \right) + k$$

$$\begin{aligned}
& + \frac{\log \kappa_d(A) + 2\tau \log |\lambda_1| + 3 \log \bar{\zeta} + \log(\|A\| + \|B\|) + \log \frac{\sqrt{2}}{C_\delta \alpha}}{2 \log \frac{|\lambda_k|}{|\lambda_{k+1}|}} \\
& + \frac{k \left( \log \frac{\sqrt{\xi}}{1-\xi} + 2 \log \bar{\zeta} + \log \frac{\|A\|}{|\lambda_1| - |\lambda_{k+1}|} + \log \frac{1}{\delta} + C_\omega \right)}{\log \frac{|\lambda_k|}{|\lambda_{k+1}|}} \\
& + \frac{k \left( \log \frac{\sqrt{\xi}}{1-\xi} + \log \frac{1}{c} + \log \chi(\hat{L}_\tau) + 5 \log \bar{\zeta} + \log \frac{\|A\|}{|\lambda_1| - |\lambda_{k+1}|} + C_\tau \right)}{\log \frac{|\lambda_k|}{|\lambda_1|^2 |\lambda_{k+1}|}} \\
& = O(k \log n),
\end{aligned}$$

time steps, which completes the proof.  $\square$

For the convenience of readers, we provide a table summarizing all constants appearing in the bound.

Table 1: Lists of parameters and constants appearing in the bound.

| (a) Algorithmic parameters (introduced in Algorithm algorithm 1). |                  |                                                                                                                                                                                                  |
|-------------------------------------------------------------------|------------------|--------------------------------------------------------------------------------------------------------------------------------------------------------------------------------------------------|
| Constant                                                          | Appearance       | Explanation                                                                                                                                                                                      |
| $t_0$                                                             | Stage 1          | $t_0$ initialization steps to separate unstable components                                                                                                                                       |
| $\omega$                                                          | Stage 3          | $\omega$ heat-up steps in each iteration of learning $B_\tau$                                                                                                                                    |
| $\alpha$                                                          | Stage 3          | $\ u_{t_i}\  = \alpha \ x_{t_i}\ $ to keep non-negligible unstable component                                                                                                                     |
| $\tau$                                                            | Stage 4          | $\tau$ steps between consecutive control inputs are injected                                                                                                                                     |
| (b) System parameters (as functions of dynamical matrices).       |                  |                                                                                                                                                                                                  |
| Constant                                                          | Definition       | Explanation                                                                                                                                                                                      |
| $\lambda_i$                                                       | Assumption 4.1   | (complex) eigenvalue of $A$ with $i^{\text{th}}$ largest modulus                                                                                                                                 |
| $\ A\ , \ B\ $                                                    | Notation         | 2-norm of dynamical matrices $A$ and $B$                                                                                                                                                         |
| $c$                                                               | Assumption 4.3   | $c$ effective controllability over the unstable subspace $E_u$ , i.e., $\sigma_{\min}(R_1 B) > c \ B\ $                                                                                          |
| $\xi$                                                             | Definition 3.1   | $E_u^\perp$ and $E_s$ are $\xi$ -close subspaces, i.e., $\sigma_{\min}(P_2^\top Q_2) > 1 - \xi$                                                                                                  |
| $\chi(\cdot)$                                                     | Lemma D.1        | perturbation constant for 2-by-2 block diagonal matrices                                                                                                                                         |
| $\zeta_\varepsilon(\cdot)$                                        | Lemma G.1        | Gelfand constant for the norm of matrix exponents                                                                                                                                                |
| $\kappa_d(\cdot)$                                                 | Notation         | the diagonalization condition number, i.e., condition number of the matrix formed by eigenvectors as columns                                                                                     |
| (c) Shorthand notations (introduced in proofs).                   |                  |                                                                                                                                                                                                  |
| Constant                                                          | Definition       | Explanation                                                                                                                                                                                      |
| $C_\Delta$                                                        | Proposition G.1  | $C_\Delta := \zeta_{\varepsilon_1}(M_1) \zeta_{\varepsilon_2}(M_2) \frac{(2-\xi)\sqrt{2\xi}\ A\ }{1-\xi} \frac{2 \lambda_{k+1} }{ \lambda_1  + \varepsilon_1 -  \lambda_{k+1}  - \varepsilon_2}$ |
| $C_\gamma$                                                        | Proposition G.3  | $C_\gamma := \frac{1}{(1+\frac{1}{\gamma})\zeta_{\varepsilon_3}(N_1^{-1})\zeta_{\varepsilon_2}(N_2)\ R_2\ }$ ( $\gamma$ is taken according to (42))                                              |
| $C_B$                                                             | Proposition G.6  | $C_B := \frac{2\sqrt{k}\zeta_{\varepsilon_1}(A)^2 \left( (2\tau+2)\ A\  + \ B\  \right)}{\alpha}$                                                                                                |
| $C_K$                                                             | Proposition G.7  | $C_K := \frac{4\zeta_{\varepsilon_3}(N_1^{-1}) \left( \zeta_{\varepsilon_1}(M_1)( \lambda_1  + \varepsilon_1) + 2\ A\ \zeta_{\varepsilon_1}(A) \right)}{c\ B\ }$                                 |
| $\zeta$                                                           | below (41)       | $\zeta := \max\{\zeta_{\varepsilon_1}(A), \zeta_{\varepsilon_2}(M_2), \zeta_{\varepsilon_2}(N_2), \zeta_{\varepsilon_3}(N_1^{-1})\}$                                                             |
| $C_\tau, C_\delta, C_\omega$                                      | (41), (44), (46) | collection of numerical constants in (41), (44), (46)                                                                                                                                            |

## H An Illustrative Example with Additive Noise

Finally, we include an illustrative experiment that shows the performance of our LTS<sub>0</sub> algorithm.

**Settings.** We evaluate the algorithm in LTI systems with additive noise

$$x_{t+1} = Ax_t + Bu_t + w_t, \quad \text{where } w_t \stackrel{\text{i.i.d.}}{\sim} \mathcal{N}(0, \sigma_w^2 I).$$

Here  $\sigma_w$  characterizes the variance (and thus the magnitude) of the noise. The dynamical matrices are randomly generated:  $A$  is generated based on its eigen-decomposition  $A = V\Lambda V^{-1}$ , where the

997 eigenvalues  $\Lambda = \text{diag}(\lambda_1, \dots, \lambda_n)$  are randomly generated by selecting  $\lambda_{1:k} \sim \mathcal{U}(1, \lambda_{\max})$  and  
 998  $\lambda_{k+1:n} \sim \frac{|\lambda_k|}{|\lambda_1|^2} \cdot \mathcal{U}(-1, 1)$  (to ensure  $|\lambda_1|^2 |\lambda_{k+1}| < |\lambda_k|$ ), and the eigenvectors  $V = [v_1, \dots, v_n]$   
 999 are generated by random perturbation to a random orthogonal matrix (to avoid tiny  $\xi$ ); meanwhile,  $B$   
 1000 is generated by random sampling i.i.d. entries from  $\mathcal{U}(0, 1)$ . For comparability and reproducibility,  
 1001 throughout the experiment we set  $k = 3$  and use 0 as the initial random seed.

1002 To compare the performance in different settings, 30 data points are collected for each pair of  $\sigma_w$   
 1003 and  $n$ . It is observed that our algorithm might cause numerical instability issues (e.g.,  $\text{cond}(D^\top D)$   
 1004 could be large), so we simply ignore such cases and repeat until 30 data points are collected. The  
 1005 parameters of the algorithm are determined in an adaptive way that minimizes the number of running  
 1006 steps: we search for the minimum  $t_0$  that yields estimation error smaller than  $\delta$ , search for the  
 1007 minimum  $\tau$  such that  $K = B_\tau^{-1} M_1^\top P_1^\top$  stabilizes the system, and the  $\omega$  heat-up steps in Stage 3  
 1008 could be ended earlier if we already observe  $\|\hat{P}_1^\top x\|/\|x\|$  larger than a certain threshold.

1009 Our experimental results are presented in Figure 1 below.

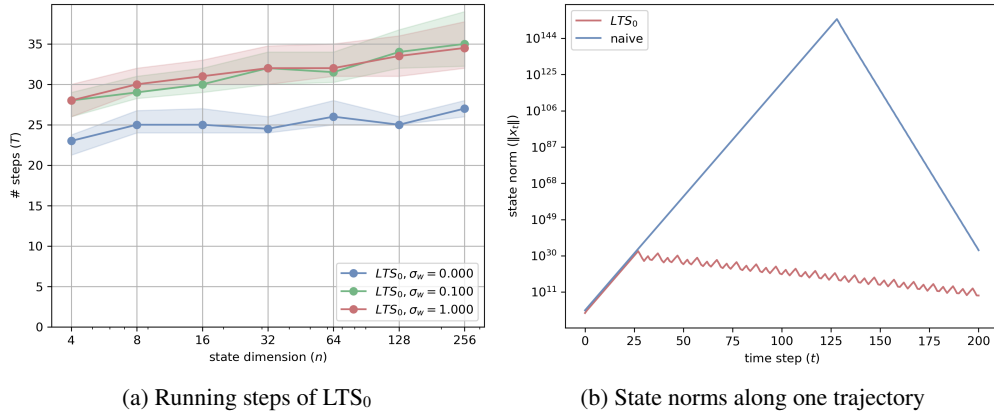

Figure 1: Experimental results. In (a) the line shows the median of running steps, and the shadow marks the range between upper and lower quartiles (the horizontal axis is in log scale). In (b) the trajectories of our algorithm and the naive approach are compared in a randomly-generated system with  $n = 128$  and  $\sigma_w = 0$  (the vertical axis is in log scale).

1010 **Performance under different  $n$  and  $\sigma_w$ .** Figure 1a shows the number of running steps of  $LTS_0$   
 1011 that is needed to learn a stabilizing controller. It is evident that the number of running steps grow  
 1012 almost linearly with regard to  $\log n$ , which is in accordance with Theorem 4.1.

1013 As for the effect of noise, it is observed that the algorithm needs more steps in systems with noise  
 1014 than in those without noise; nevertheless, the magnitude of noise does not have much influence on  
 1015 the number of running steps. This is also reasonable since the increase is mainly attributed to  $t_0$  —  
 1016 it takes more initial steps to push the state close enough to  $E_u$ , such that the estimation error of  $P_1$   
 1017 drops to acceptable level; however, as the  $E_u$ -component grows exponentially fast over time while  
 1018  $w_t$  is i.i.d., the magnitude of noise only plays a minor role in the increase. Noise becomes negligible  
 1019 in later stages due to the disproportionate magnitudes of states and noise.

1020 **Analysis of comparison of trajectories.** In Figure 1b we study an exemplary trajectory of our  $LTS_0$   
 1021 algorithm, and compare it against that of the naive approach, which first identifies the system and  
 1022 then designs a controller to nullify the unstable eigenvalues by standard pole-placement method.  
 1023 It is evident that our algorithm needs significantly fewer steps, and thus induces far smaller state  
 1024 norms, to learn a controller that effectively stabilizes the system. It is also observed that our con-  
 1025 troller decreases state norm in a zig-zag manner, which is due to the  $\tau$ -hop design our algorithm  
 1026 adopts. Nevertheless, a potential drawback of our controller design is that the spectral radius of the  
 1027 controlled system is larger (since we cannot precisely nullify all unstable eigenvalues), resulting in  
 1028 a slower stabilizing rate than the naive approach (compare the decreasing parts of the curves).
